# Supplementary material for: Identification of Novel Potential Inhibitors of Pteridine Reductase 1 in Trypanosoma brucei via Computational Structure-Based Approaches and in Vitro Inhibition Assays
Source: PubMed Central journal article supplement (PMC6337619; doi:10.3390/molecules24010142), 2019-01-01
Supplement: molecules-24-00142-s001.pdf [file molecules-24-00142-s001.pdf]

# Identification of Novel Potential Inhibitors of Pteridine Reductase 1 in *Trypanosoma brucei* via Computational Structure-Based Approaches and *in vitro* Inhibition Assays

Magambo Phillip Kimuda <sup>1,2,3</sup>, Dustin Laming <sup>4,5</sup>, Heinrich C. Hoppe <sup>4,5</sup> and Özlem Tastan Bishop<sup>1,\*</sup>

<sup>1</sup> Research Unit in Bioinformatics (RUBi), Department of Biochemistry and Microbiology, Rhodes University, P.O. Box 94, Grahamstown 6140, South Africa; [pjkanywa@gmail.com](mailto:pjkanywa@gmail.com) (M.P.K.); [o.tastanbishop@ru.ac.za](mailto:o.tastanbishop@ru.ac.za) (O.T.B.)

<sup>2</sup> College of Veterinary Medicine, Animal Resources and Biosecurity (COVAB), Makerere University, P.O. Box 7062, Kampala, Uganda

<sup>3</sup> Member of the Trypanogen Consortium, [www.trypanogen.net](http://www.trypanogen.net)

<sup>4</sup> Department of Biochemistry and Microbiology, Rhodes University, Grahamstown 6140, South Africa; [dustinlaming89@gmail.com](mailto:dustinlaming89@gmail.com) (D.L.); [H.Hoppe@ru.ac.za](mailto:H.Hoppe@ru.ac.za) (H.C.H.)

<sup>5</sup> Centre for Chemico- and Biomedical Research, Rhodes University, Grahamstown 6140, South Africa;

\*Correspondence: [o.tastanbishop@ru.ac.za](mailto:o.tastanbishop@ru.ac.za); Tel.: +27-46-603-8072

**Supplementary Figure S1:** Analysis of the apo protein during 200 ns all atom MD simulation at 300 K. A) Root Mean Square Deviation of the protein back bone heavy atoms, B) Radius of Gyration, C) Per residue Root Mean Square Deviation, D) Average Shortest Path, and E) Average Betweenness Centrality

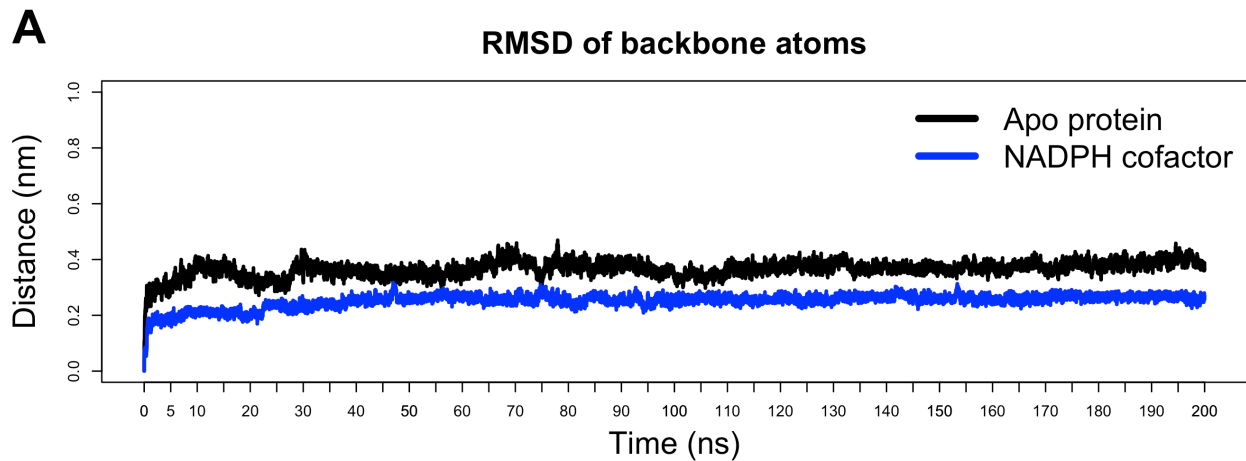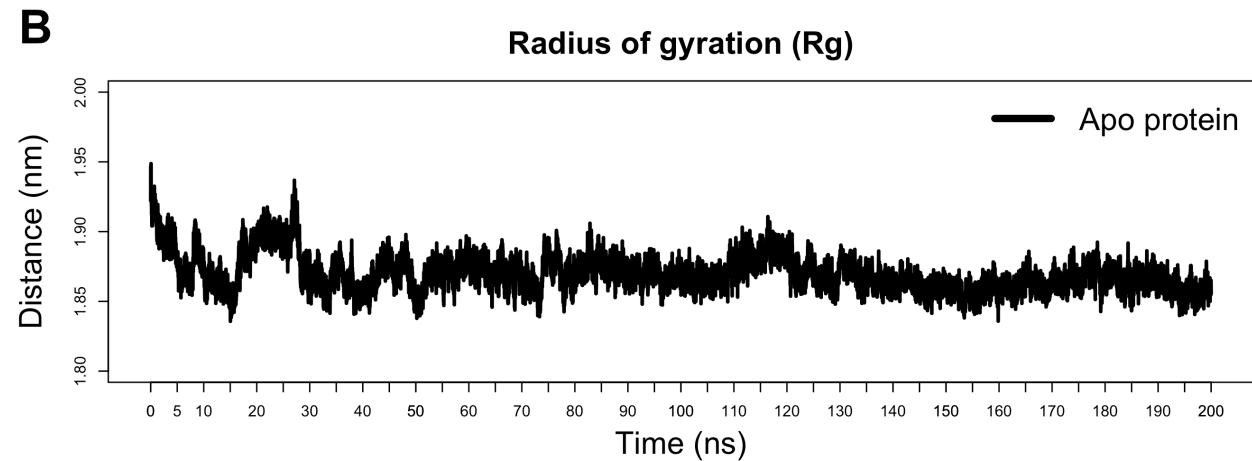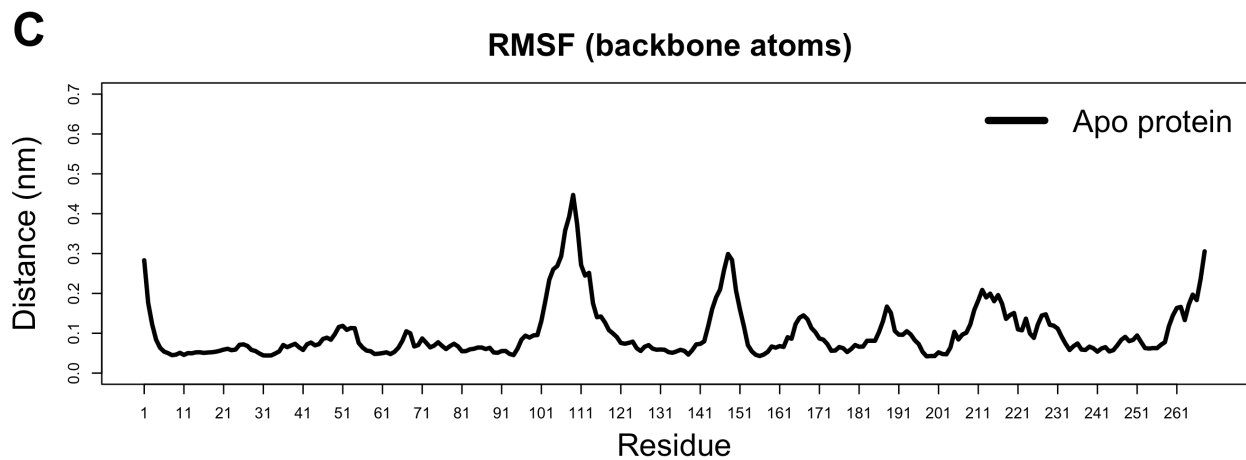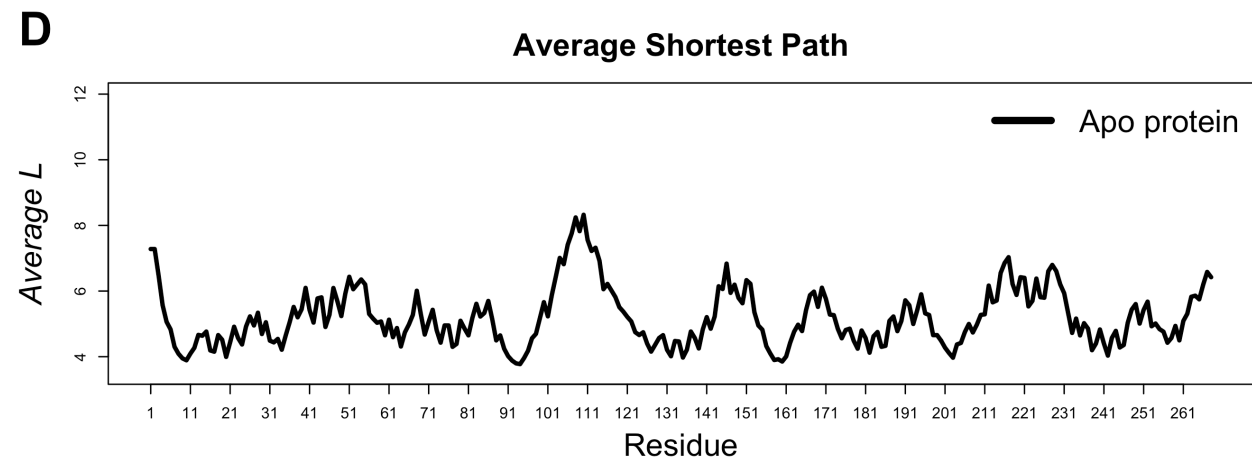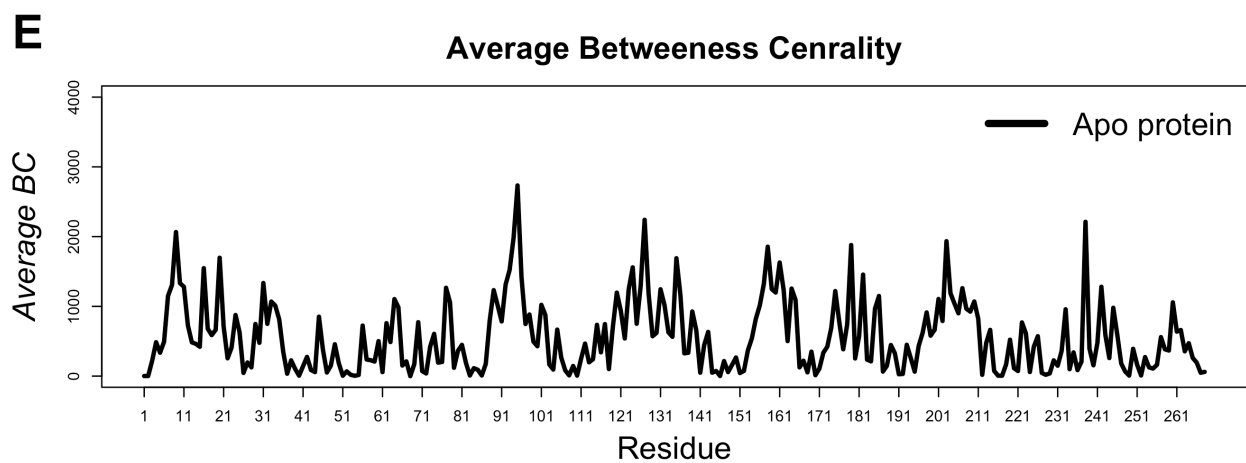

**Supplementary Figure S2:** Analysis of the TbPTR1-RUBi004 complex during 200 ns all atom MD simulation at 300 K. A) Root Mean Square Deviation of the protein back bone heavy atoms, B) Radius of Gyration, C) Protein-ligand Hydrogen bond analysis, D) Per residue Root Mean Square Deviation, E) Average Shortest Path, and F) Average Betweenness Centrality

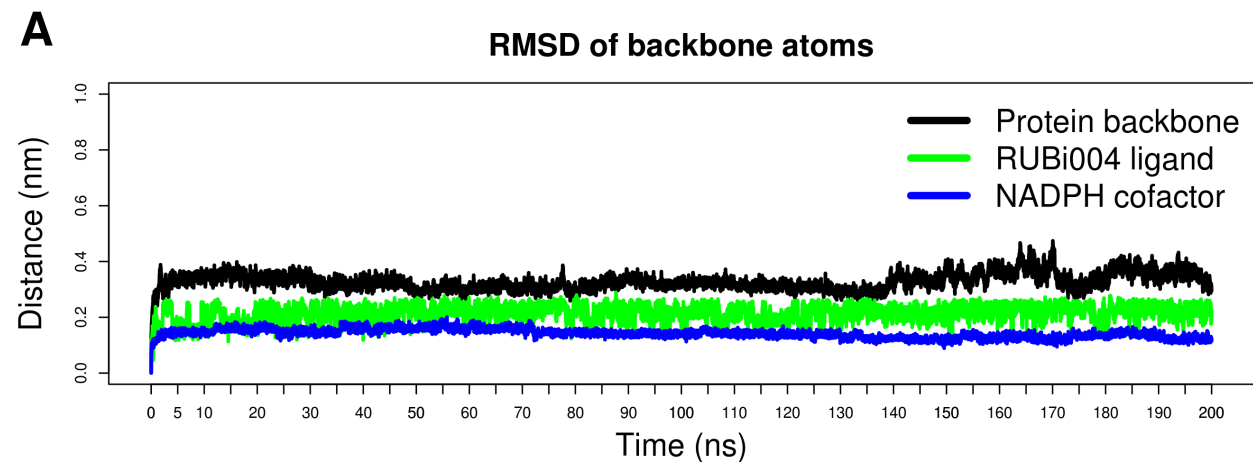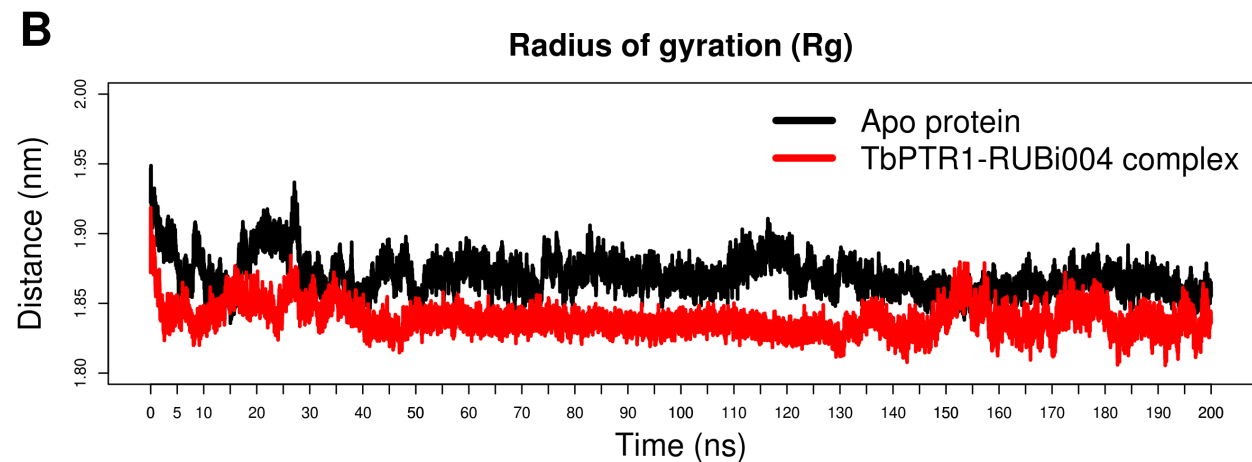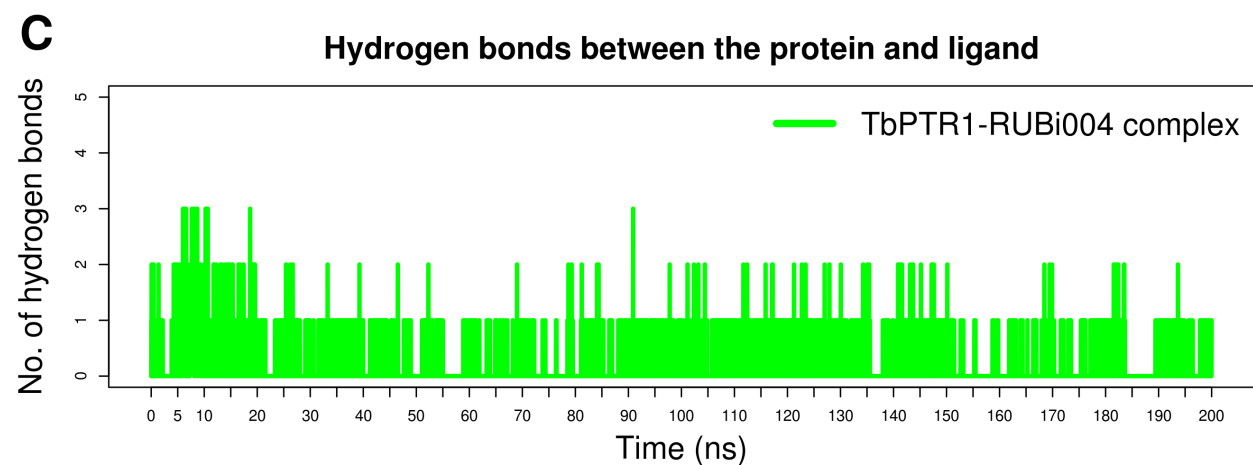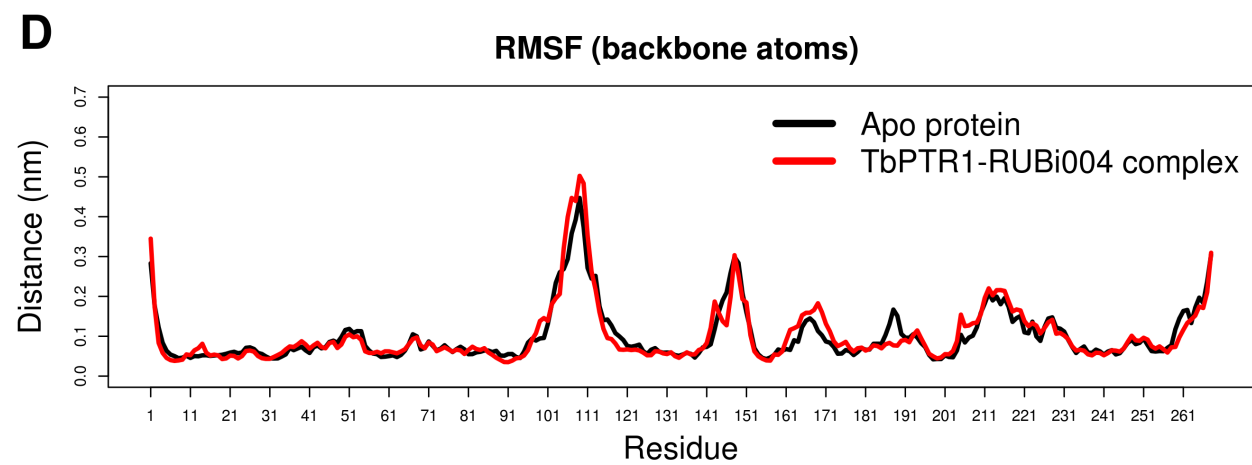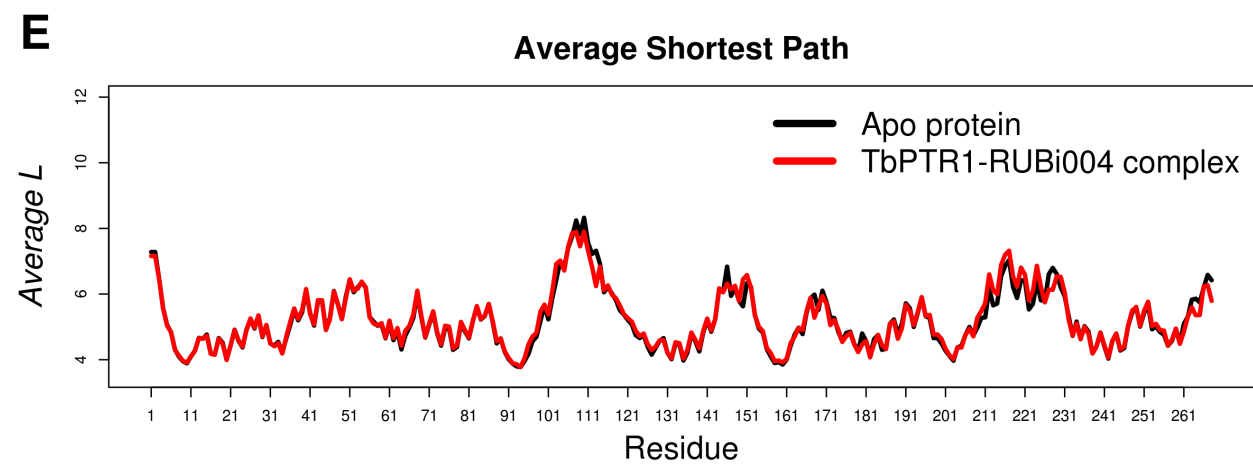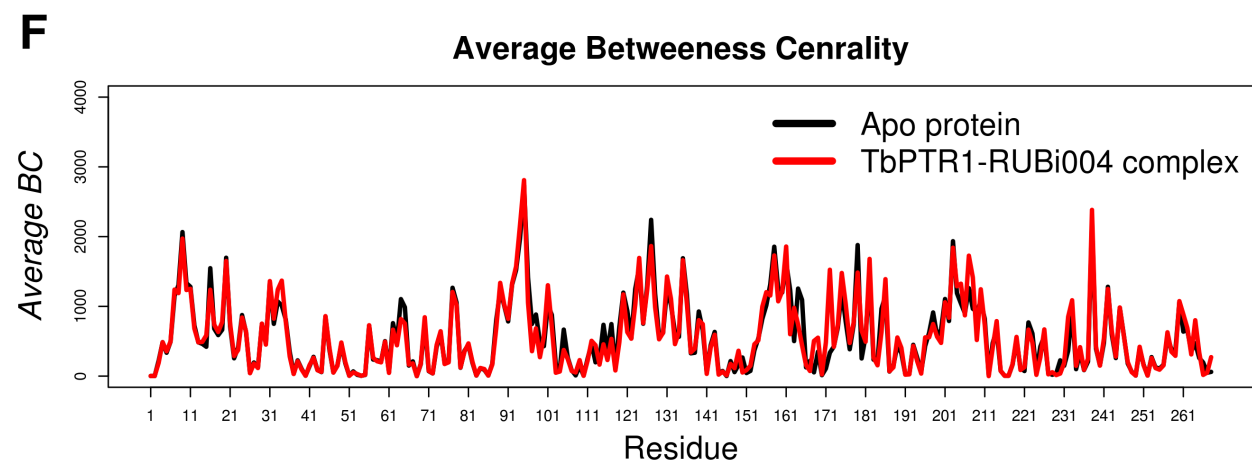

**Supplementary Figure S3:** Analysis of the TbPTR1-RUBi007 complex during 200 ns all atom MD simulation at 300 K. A) Root Mean Square Deviation of the protein backbone heavy atoms, B) Radius of Gyration, C) Protein-ligand Hydrogen bond analysis, D) Per residue Root Mean Square Deviation, E) Average Shortest Path, and F) Average Betweenness Centrality

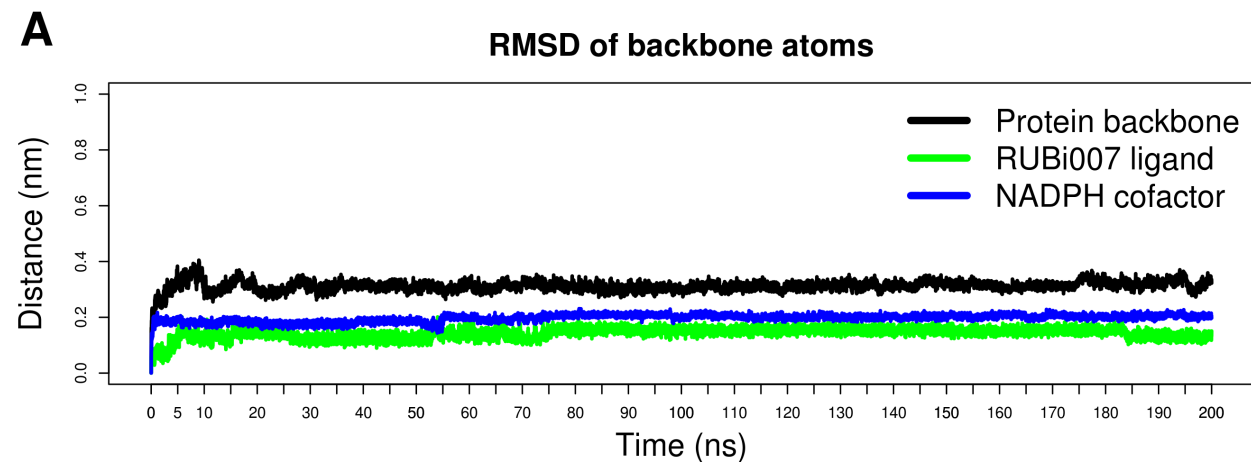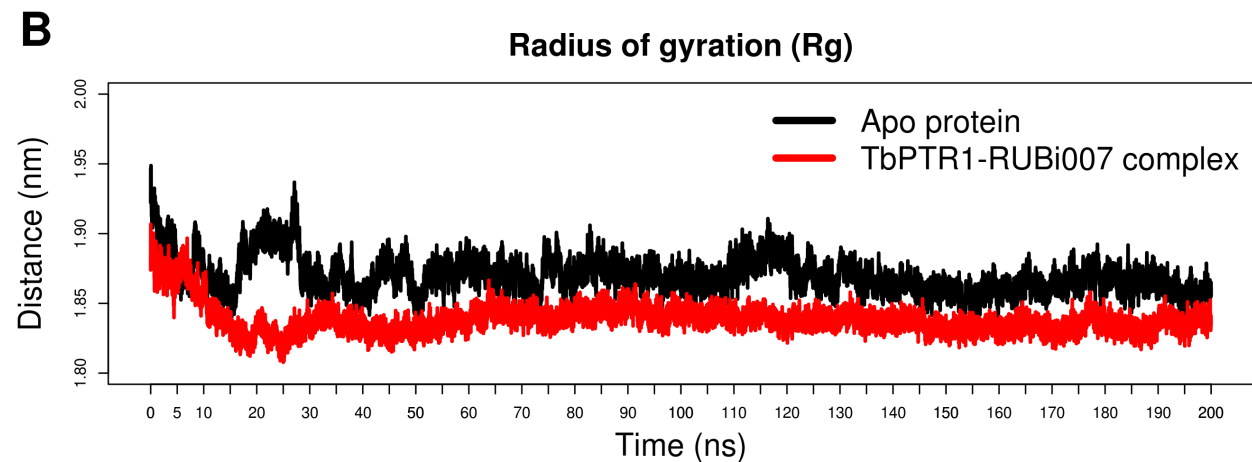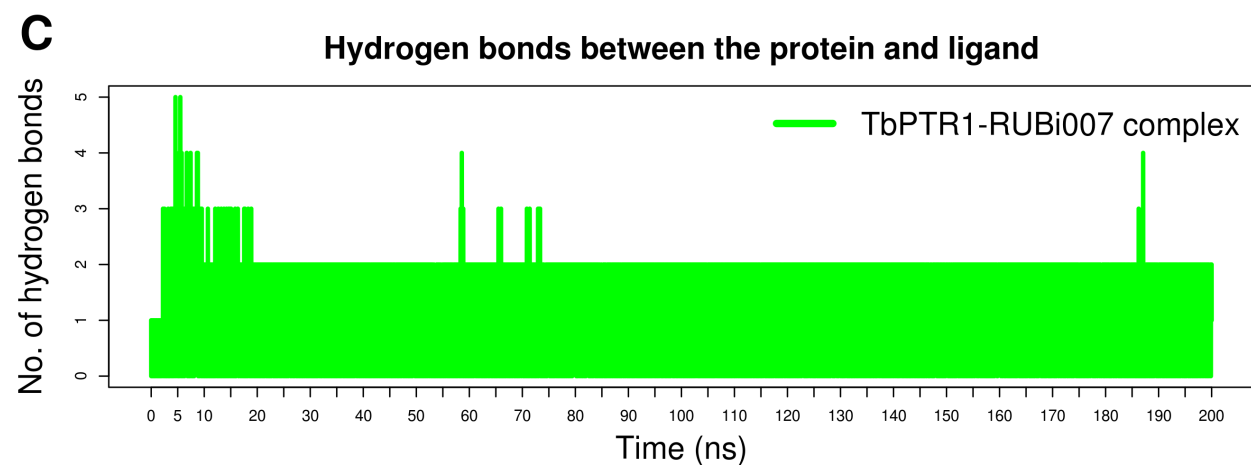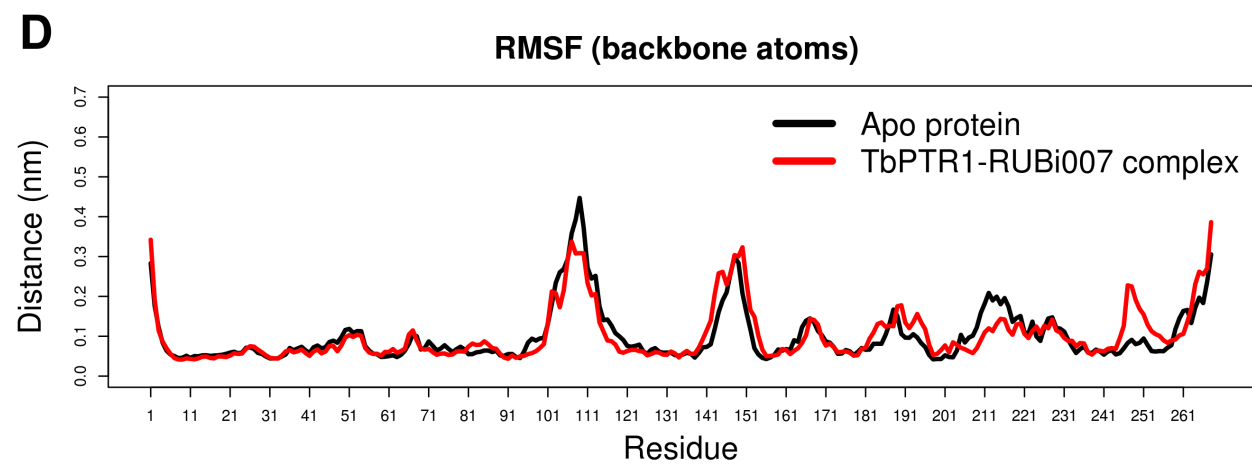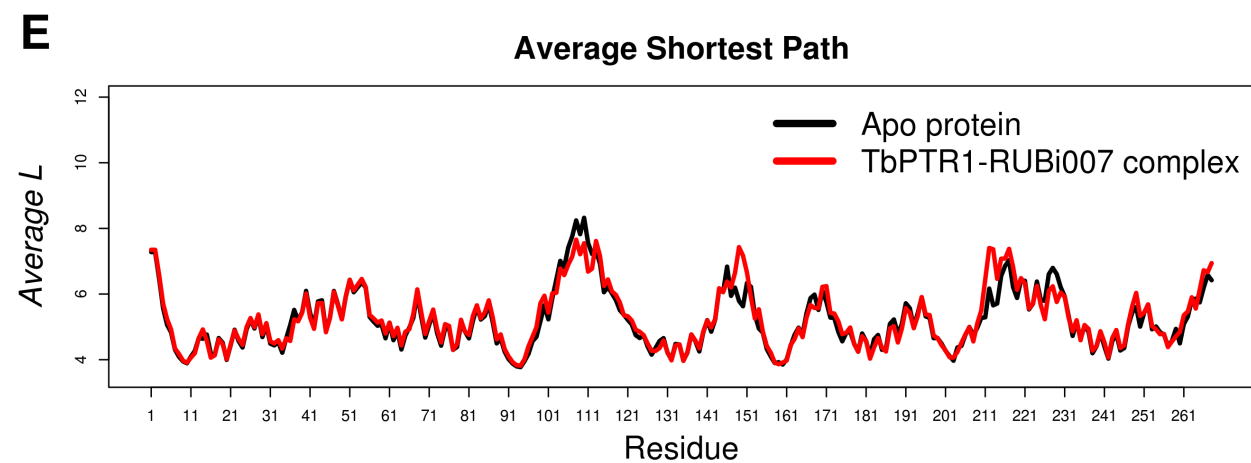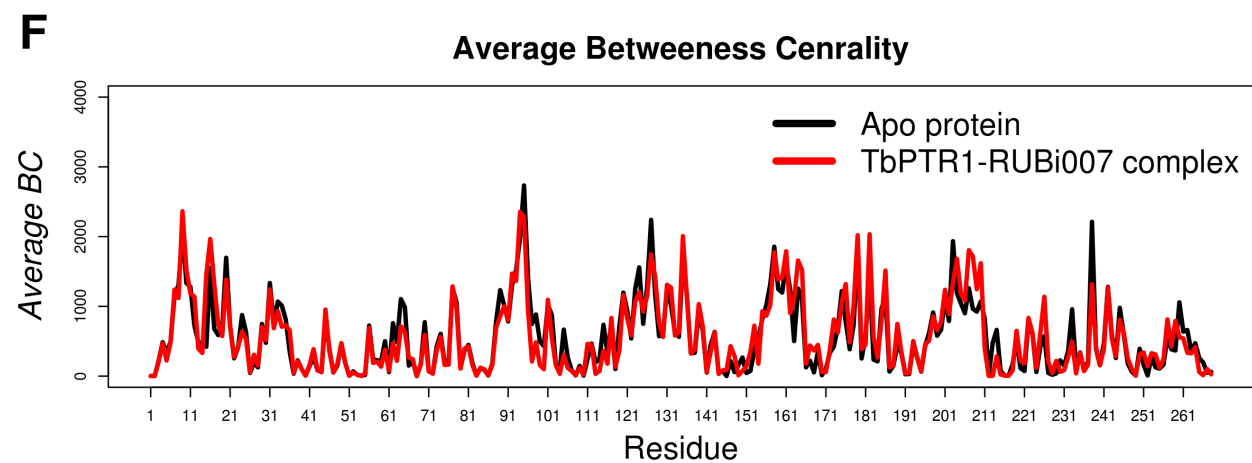

**Supplementary Figure S4:** Analysis of the TbPTR1-RUBi014 complex during 200 ns all atom MD simulation at 300 K. A) Root Mean Square Deviation of the protein backbone heavy atoms, B) Radius of Gyration, C) Protein-ligand Hydrogen bond analysis, D) Per residue Root Mean Square Deviation, E) Average Shortest Path, and F) Average Betweenness Centrality

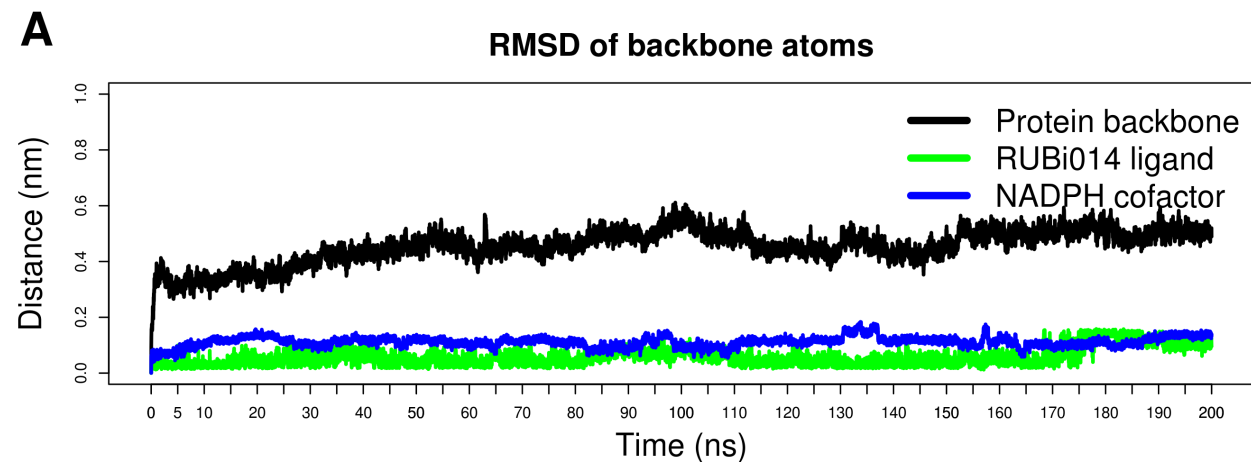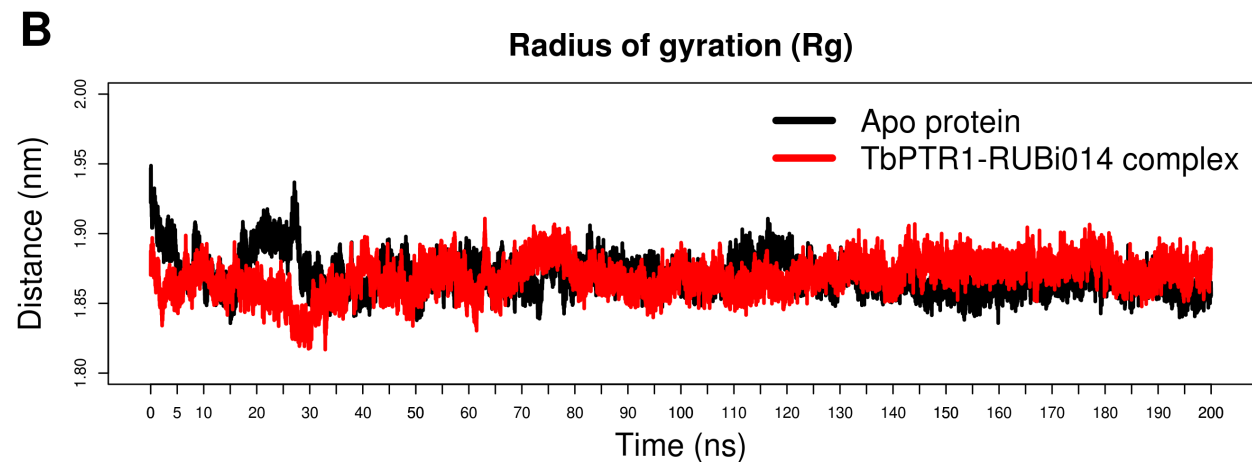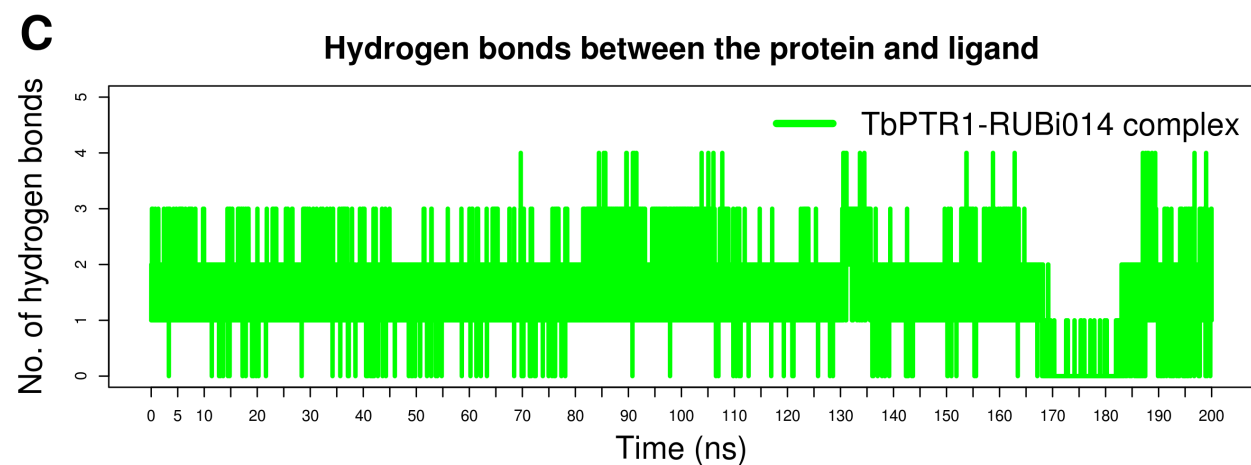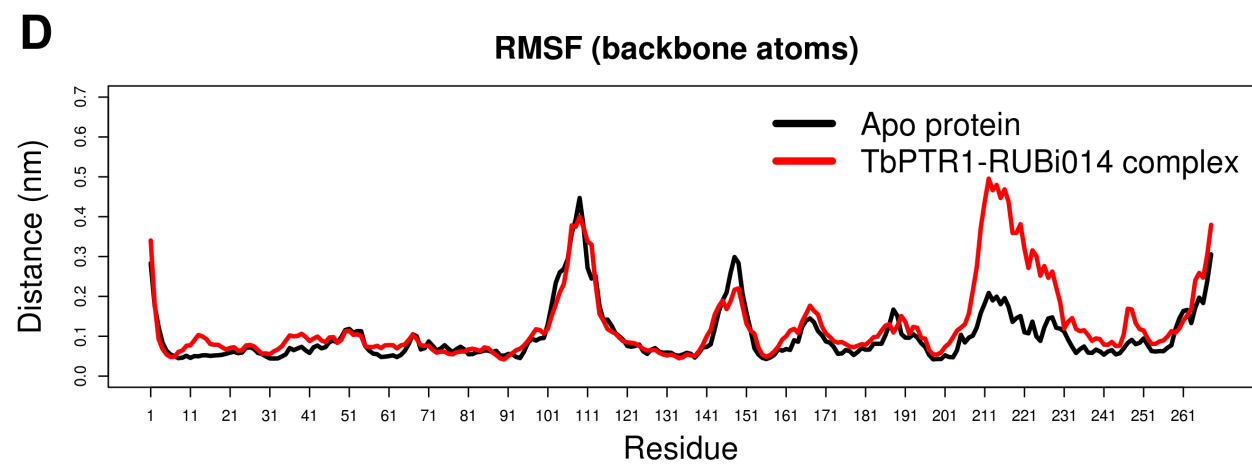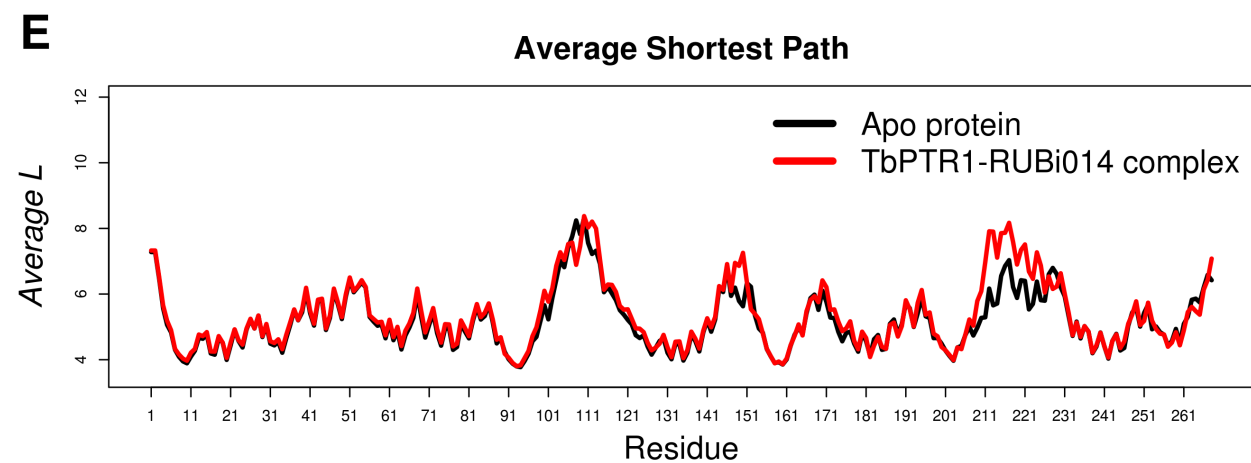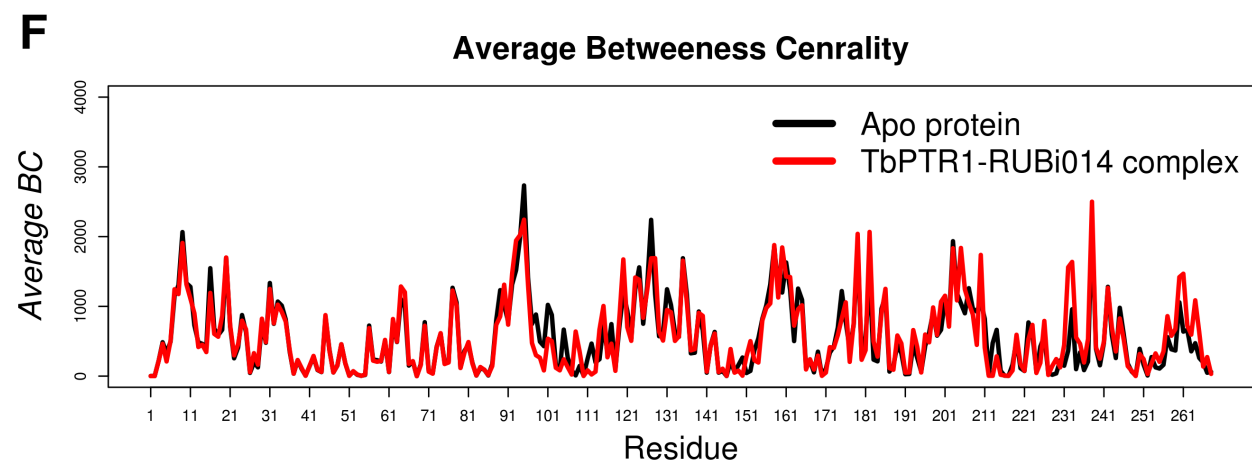

**Supplementary Figure S5:** Analysis of the TbPTR1-RUBi016 complex during 200 ns all atom MD simulation at 300 K. A) Root Mean Square Deviation of the protein back bone heavy atoms, B) Radius of Gyration, C) Protein-ligand Hydrogen bond analysis, D) Per residue Root Mean Square Deviation, E) Average Shortest Path, and F) Average Betweenness Centrality

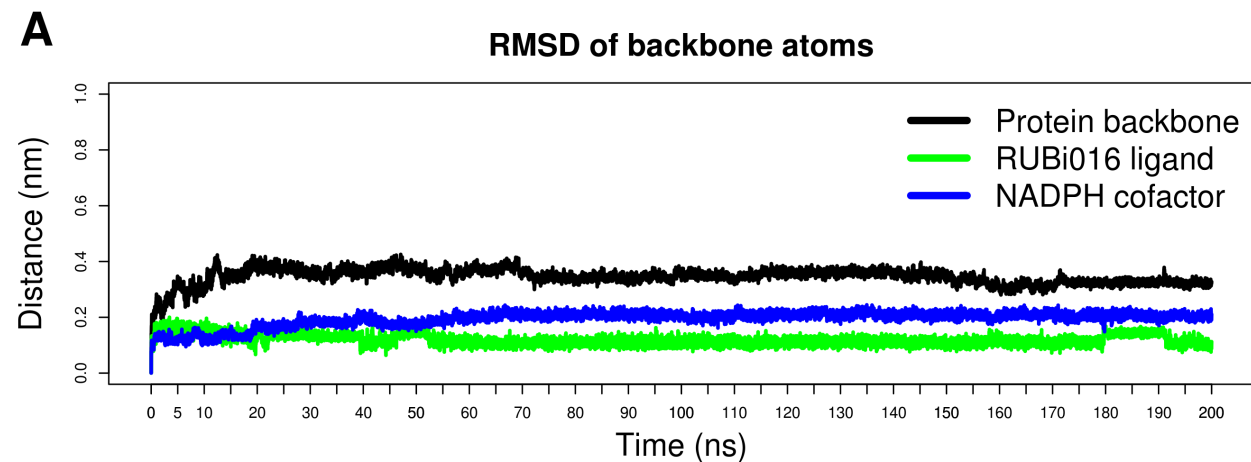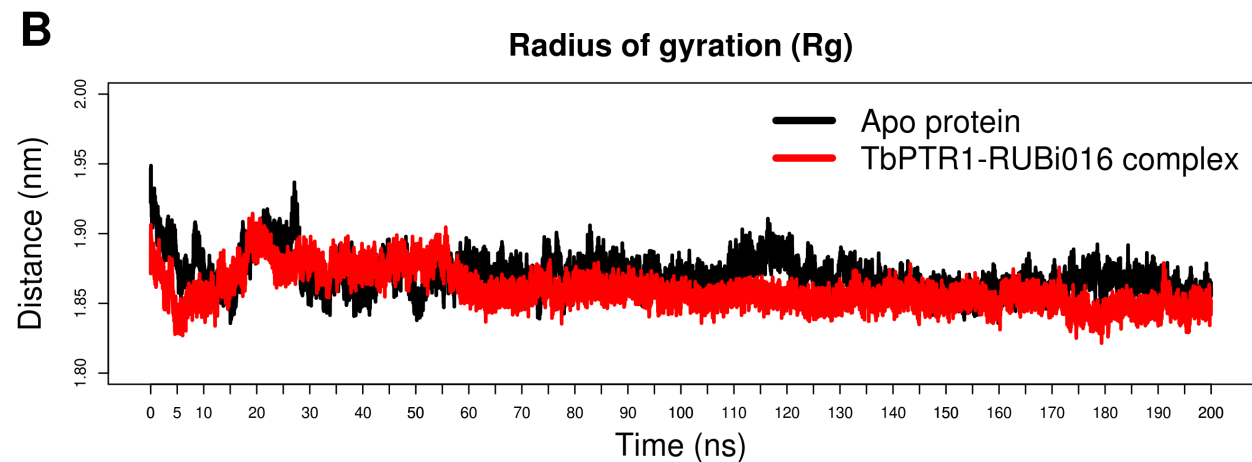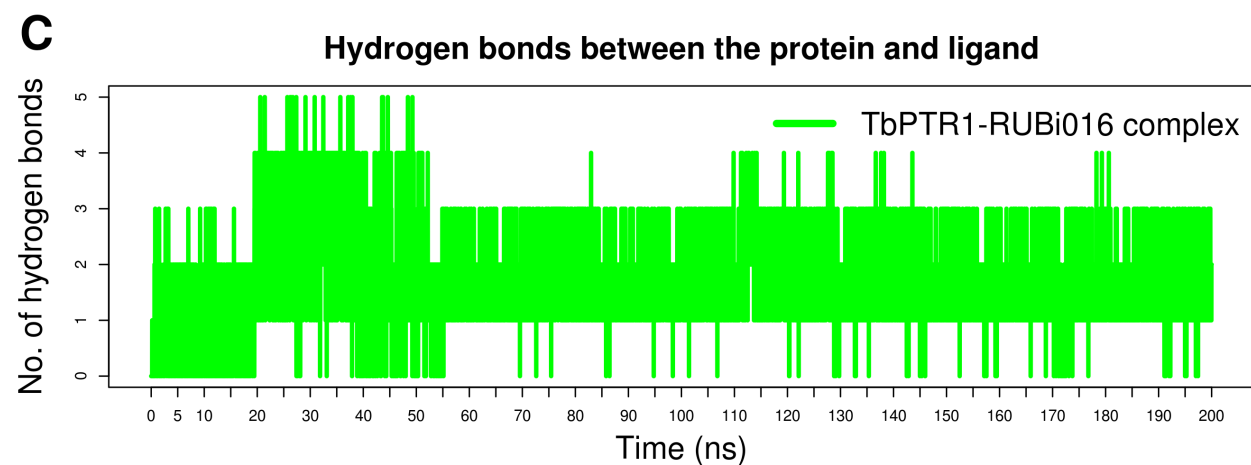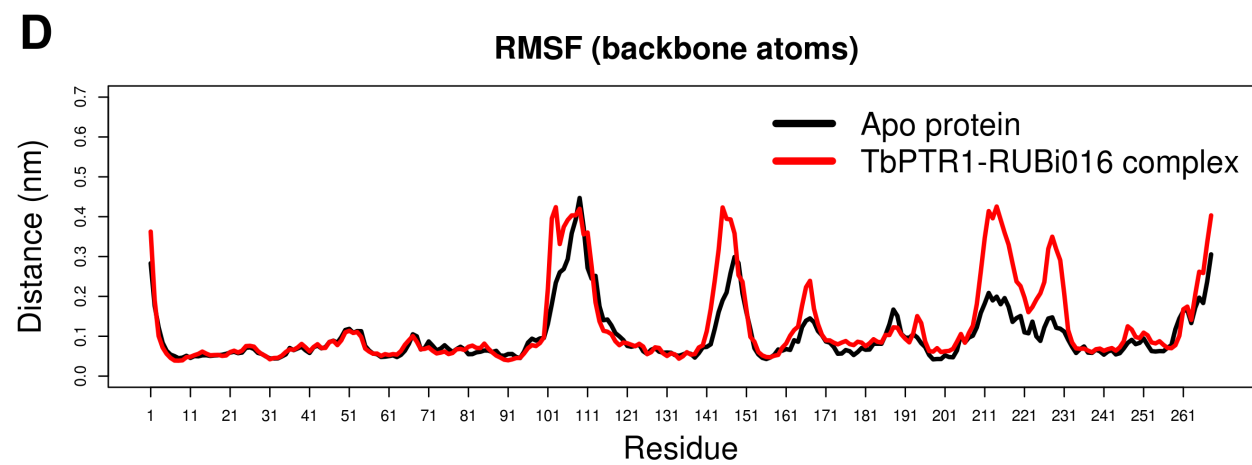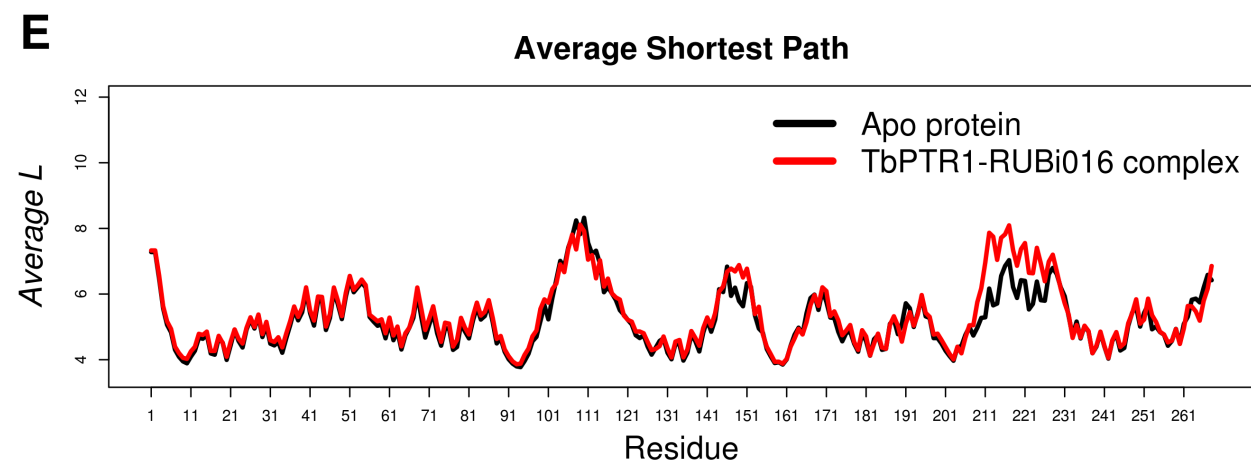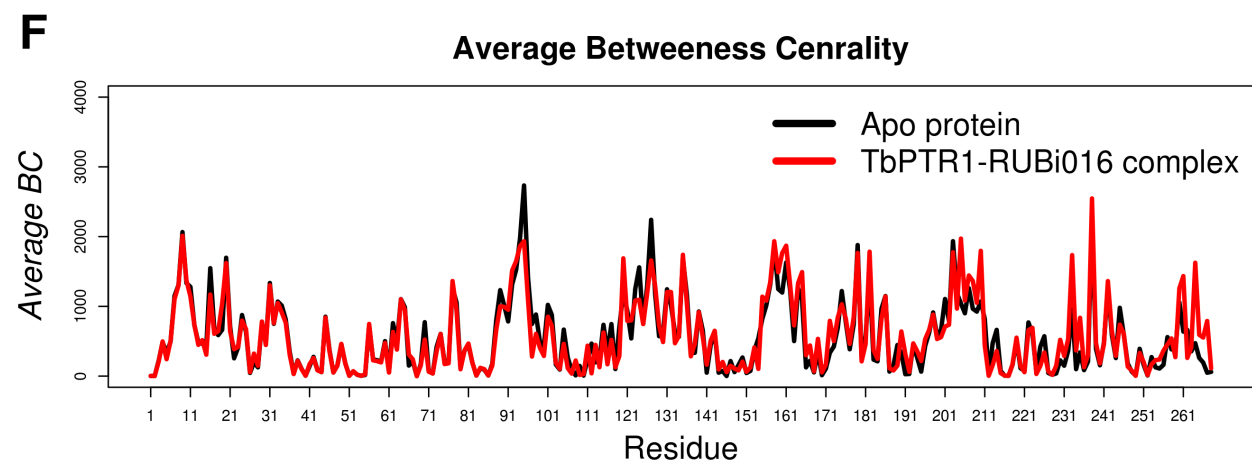

**Supplementary Figure S6:** Analysis of the TbPTR1-RUBi018 complex during 200 ns all atom MD simulation at 300 K. A) Root Mean Square Deviation of the protein back bone heavy atoms, B) Radius of Gyration, C) Protein-ligand Hydrogen bond analysis, D) Per residue Root Mean Square Deviation, E) Average Shortest Path, and F) Average Betweenness Centrality

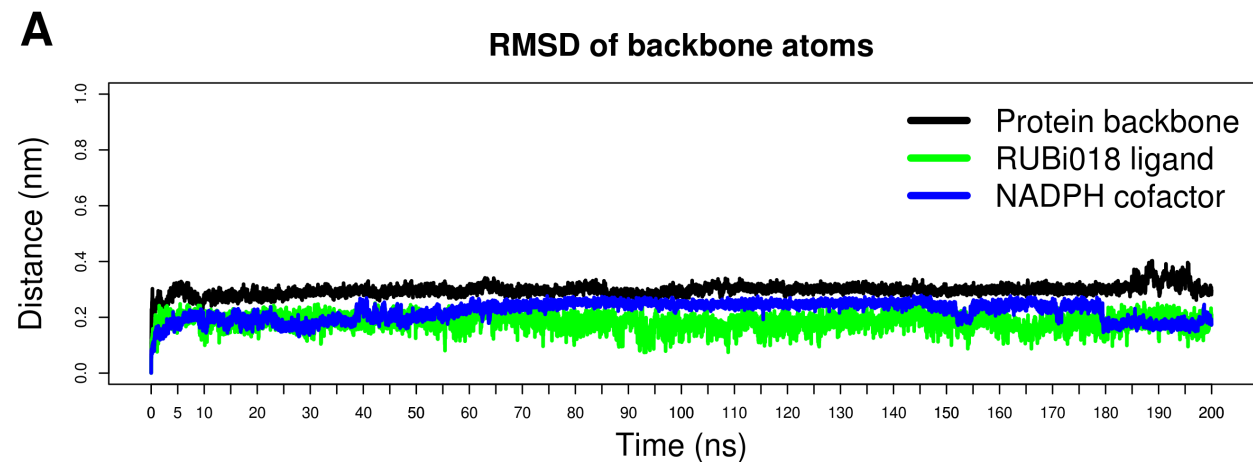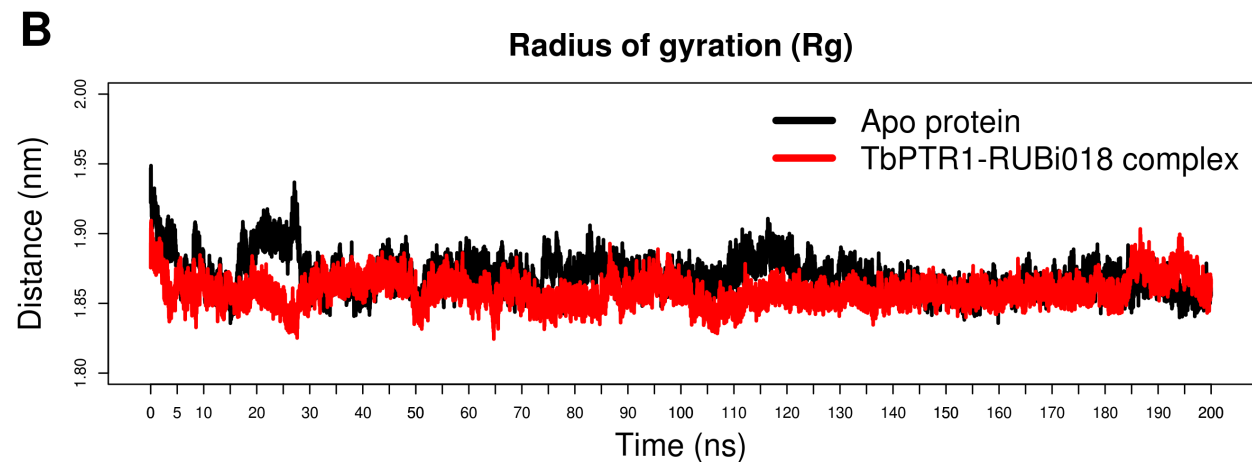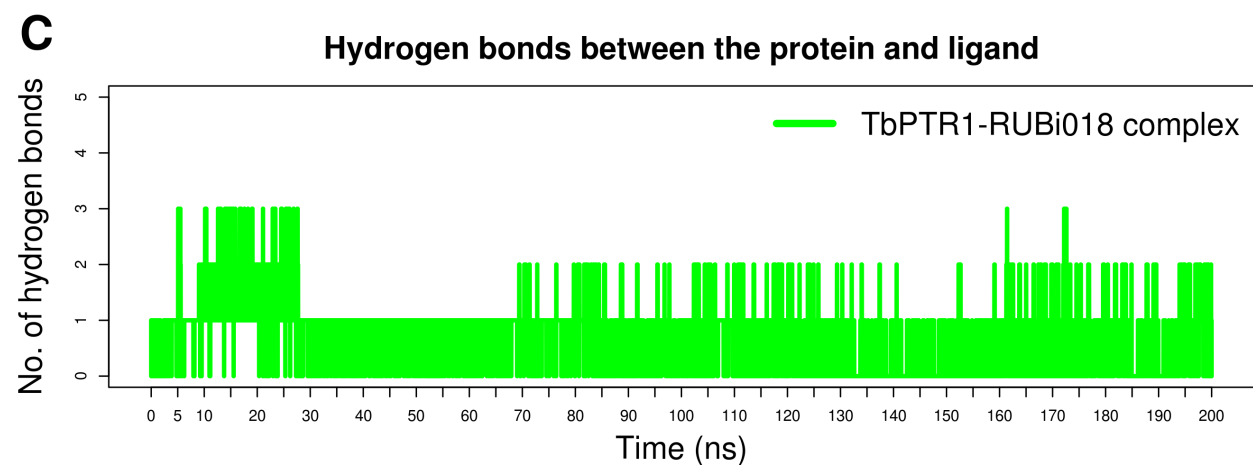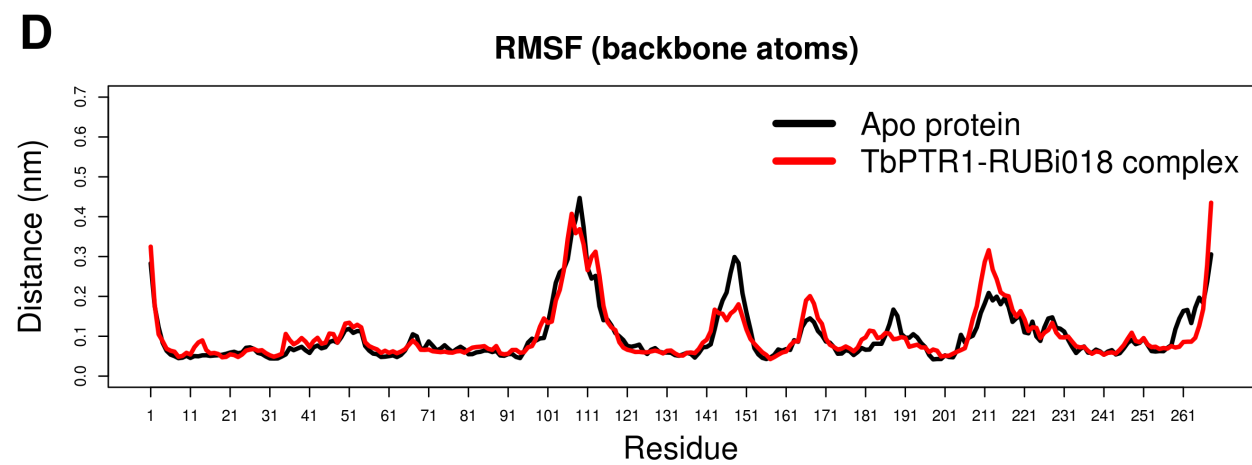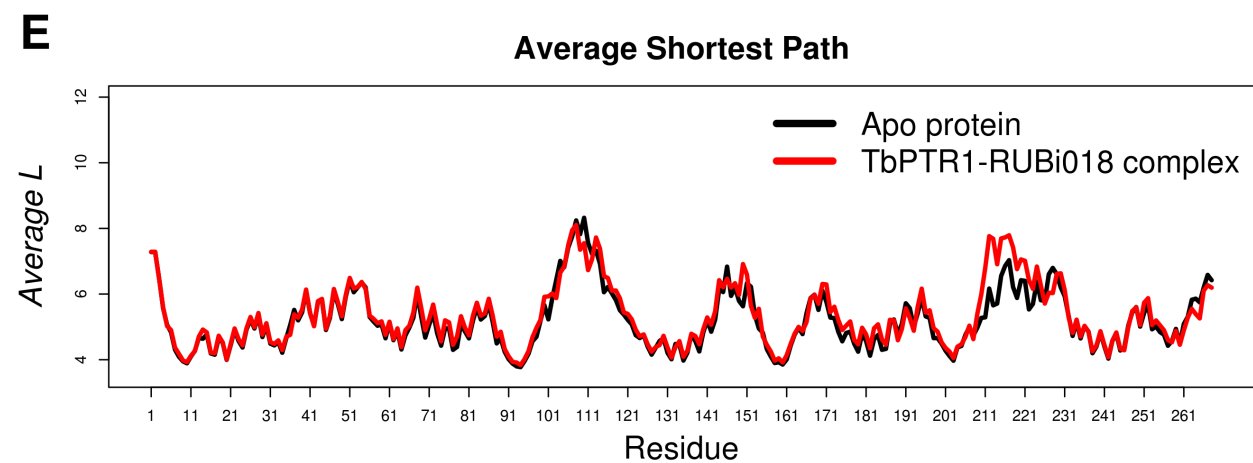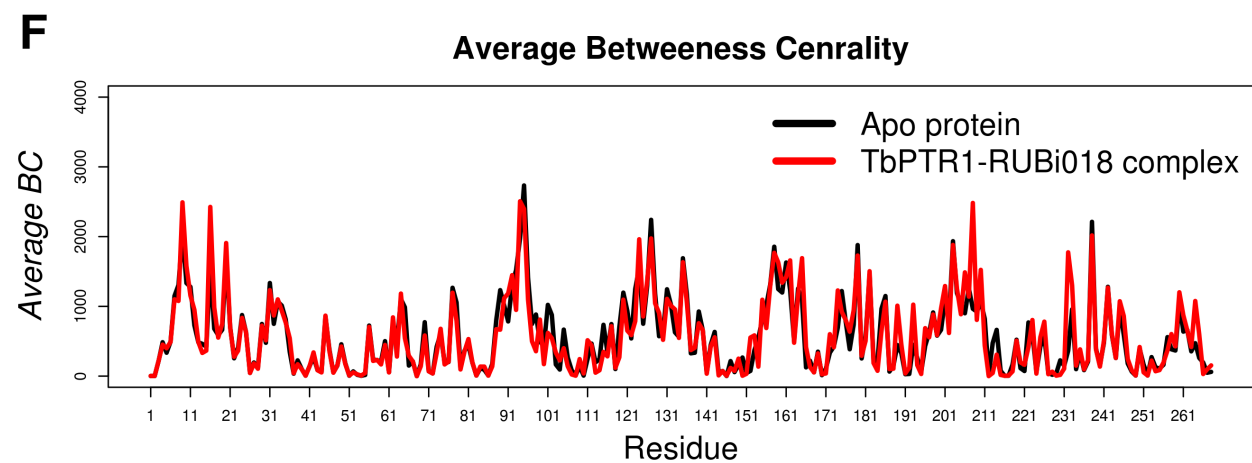

**Supplementary Figure S7: RMSD values of *Tb*PTR1 and 18 *Tb*PTR1-ligand complexes**

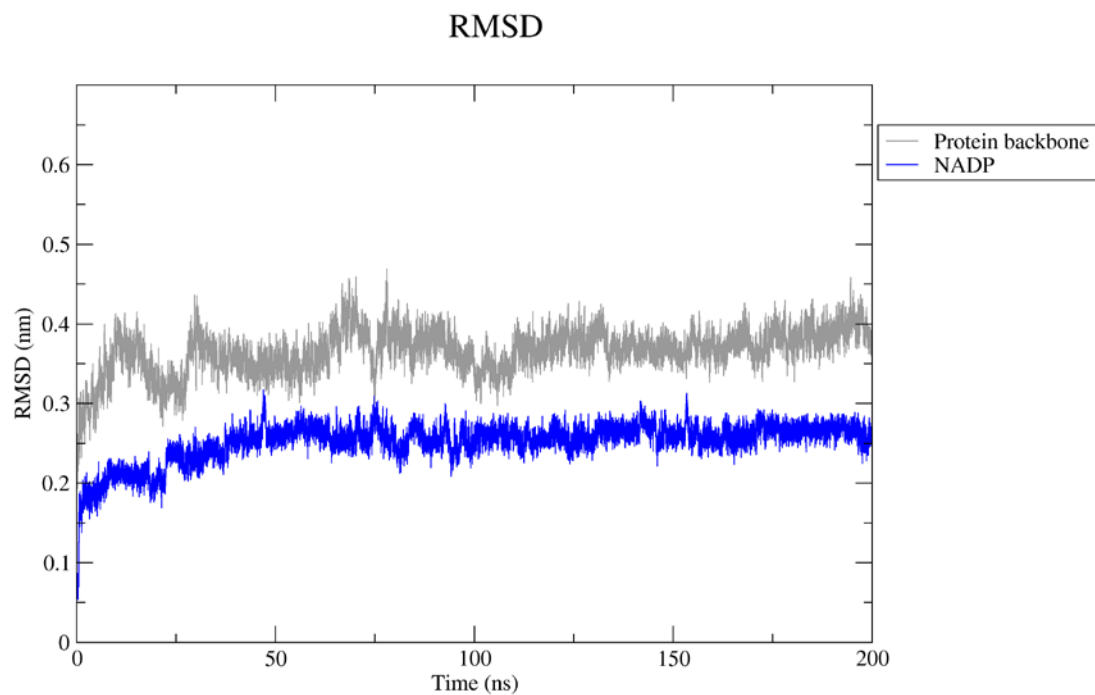

**Figure 7A:** Time dependent Root Mean Square Deviation (RMSD) of the backbone atoms of the apo protein, and NADP cofactor. The protein is coloured is coloured grey, and the NADP cofactor coloured blue.

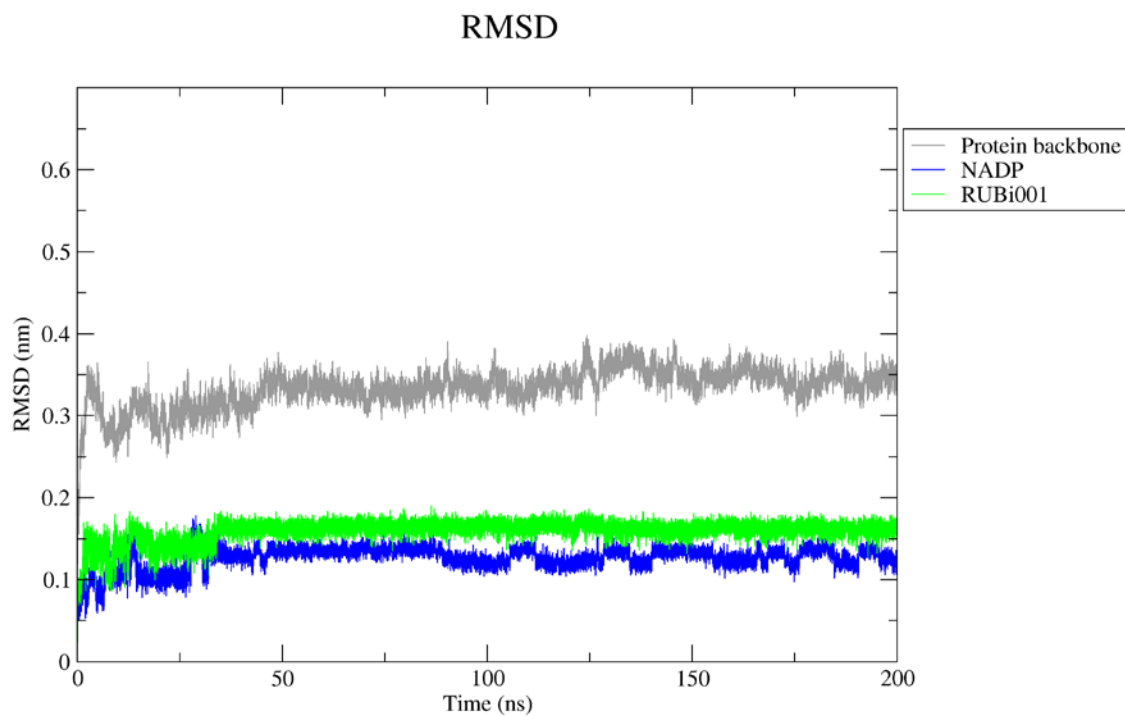

**Figure 7B:** Time dependent Root Mean Square Deviation (RMSD) of the backbone atoms of the apo protein, NADP, and ligand. The protein is coloured is coloured grey, the NADP cofactor coloured blue, and RUBi001 green.



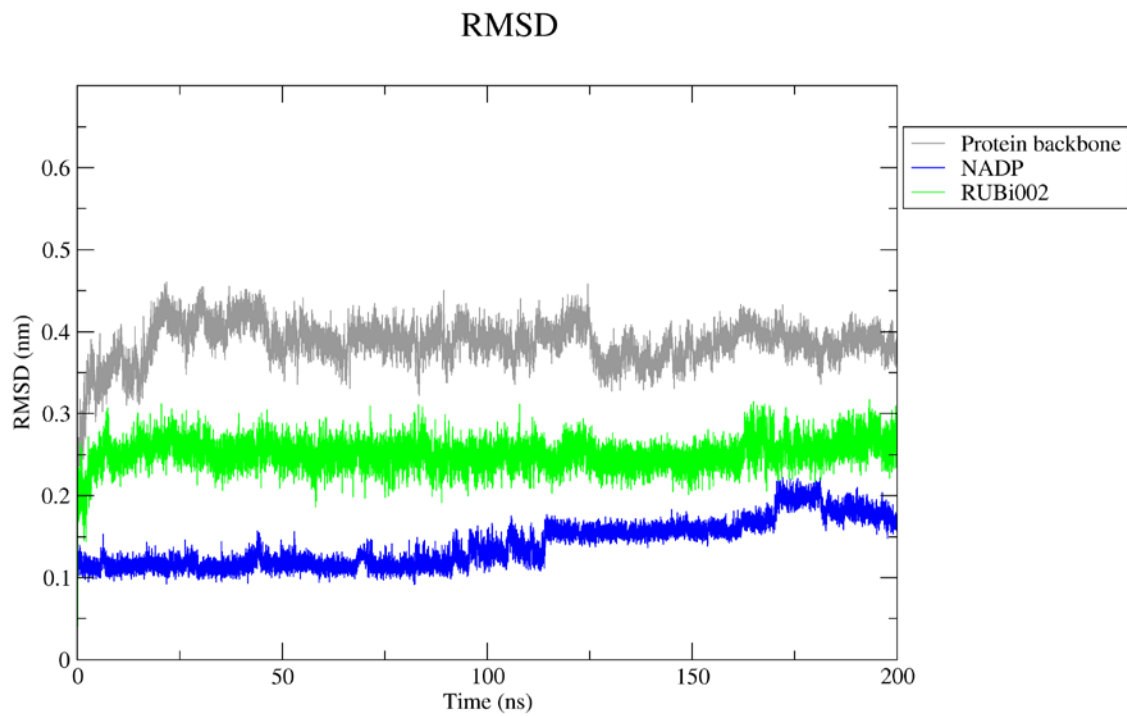

**Figure 7C:** Time dependent Root Mean Square Deviation (RMSD) of the backbone atoms of the apo protein, NADP, and ligand. The protein is coloured is coloured grey, the NADP cofactor coloured blue, and RUBi002 green.

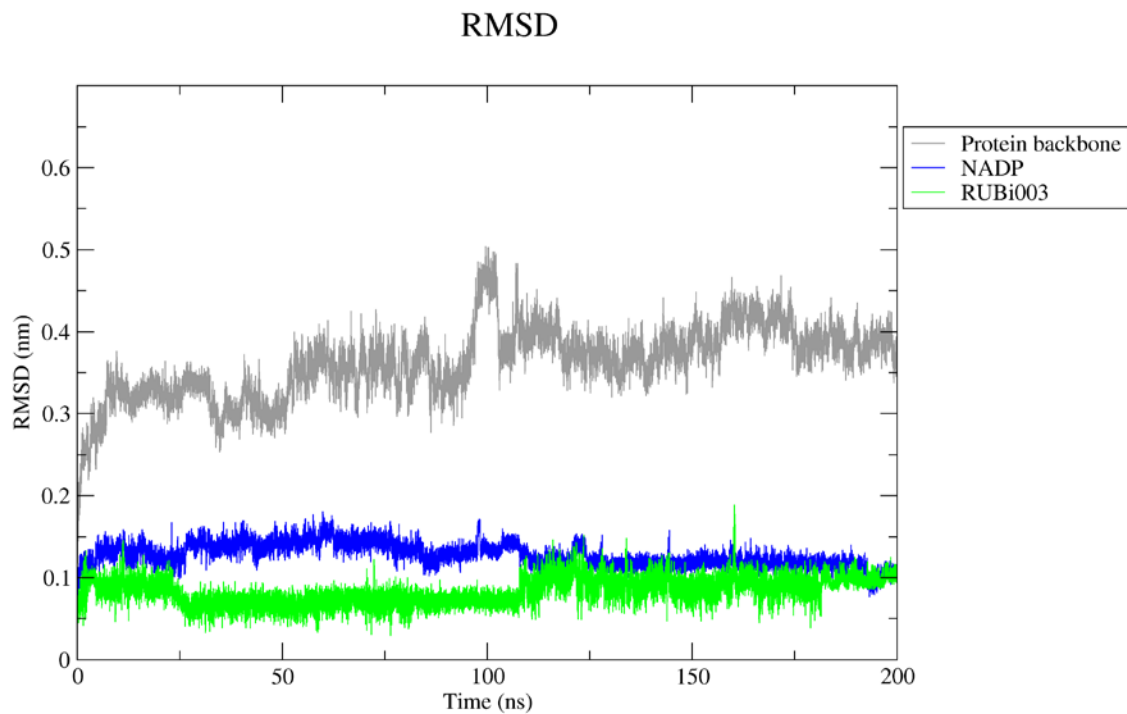

**Figure 7D:** Time dependent Root Mean Square Deviation (RMSD) of the backbone atoms of the apo protein, NADP, and ligand. The protein is coloured is coloured grey, the NADP cofactor coloured blue, and RUBi003 green.

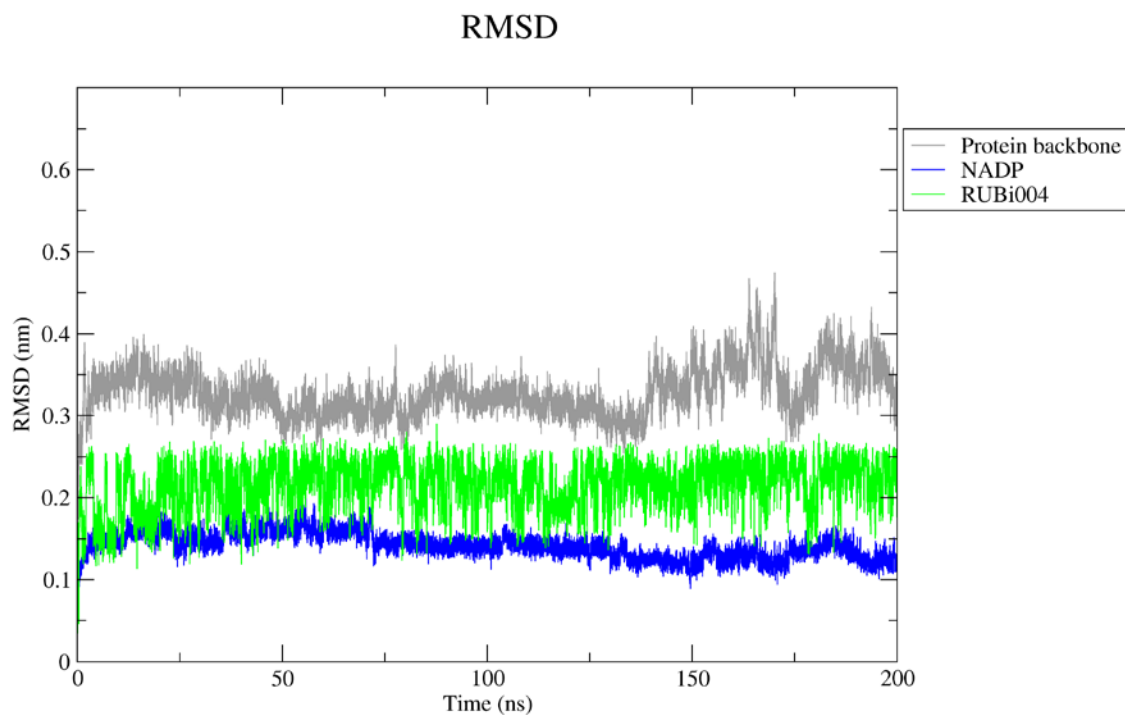

**Figure 7E:** Time dependent Root Mean Square Deviation (RMSD) of the backbone atoms of the apo protein, NADP, and ligand. The protein is coloured is coloured grey, the NADP cofactor coloured blue, and RUBi004 green.

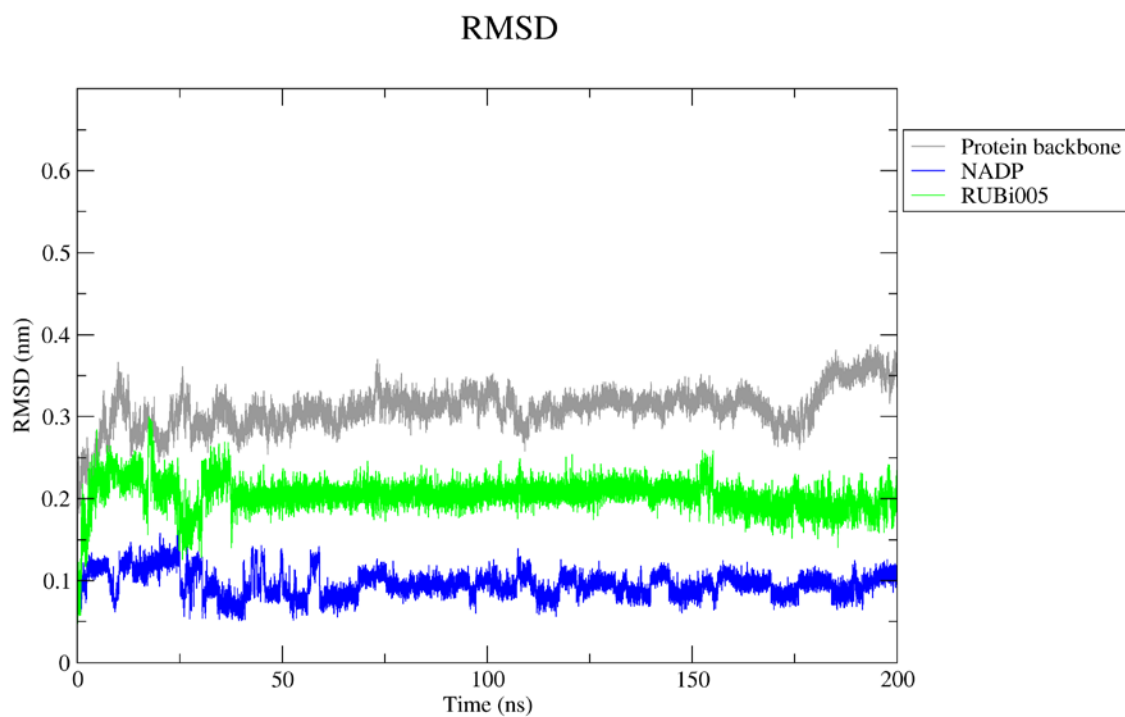

**Figure 7F:** Time dependent Root Mean Square Deviation (RMSD) of the backbone atoms of the apo protein, NADP, and ligand. The protein is coloured is coloured grey, the NADP cofactor coloured blue, and RUBi005 green.

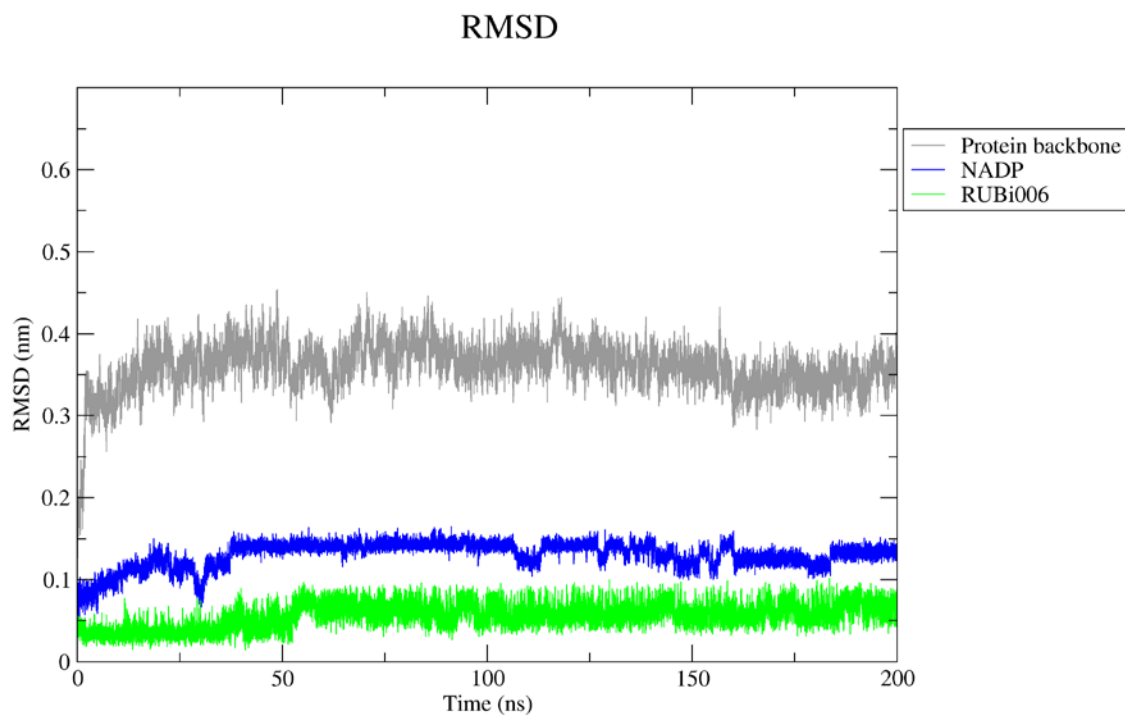

**Figure 7G:** Time dependent Root Mean Square Deviation (RMSD) of the backbone atoms of the apo protein, NADP, and ligand. The protein is coloured is coloured grey, the NADP cofactor coloured blue, and RUBi006 green.

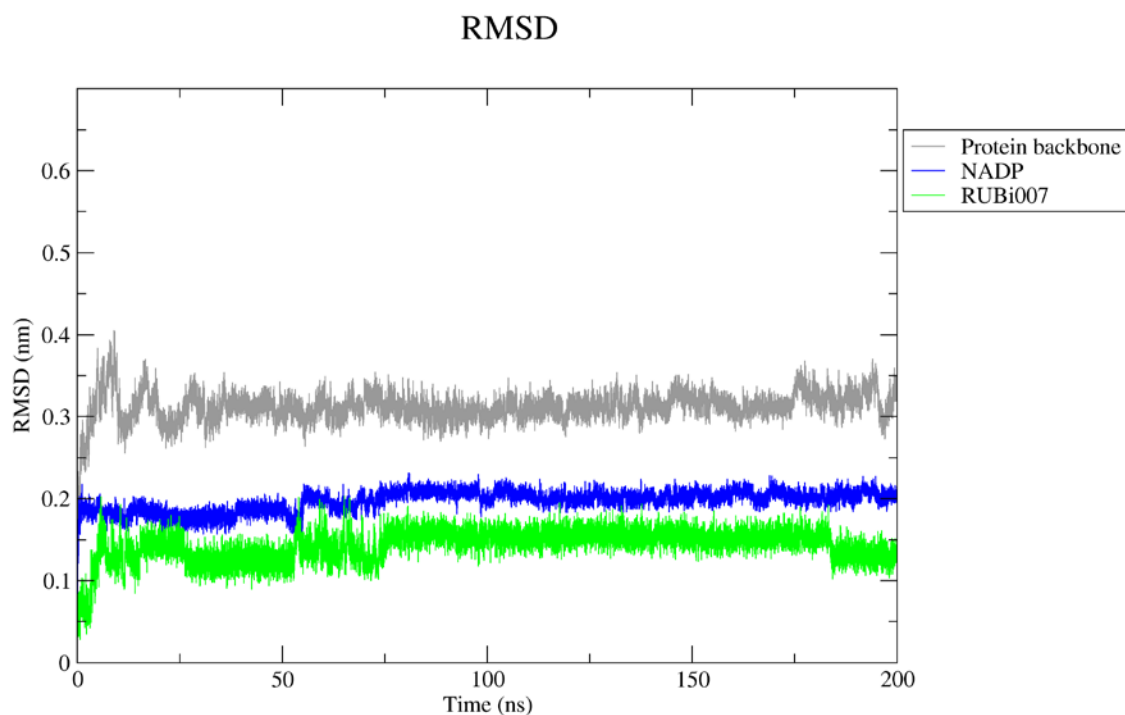

**Figure 7H:** Time dependent Root Mean Square Deviation (RMSD) of the backbone atoms of the apo protein, NADP, and ligand. The protein is coloured is coloured grey, the NADP cofactor coloured blue, and RUBi007 green.

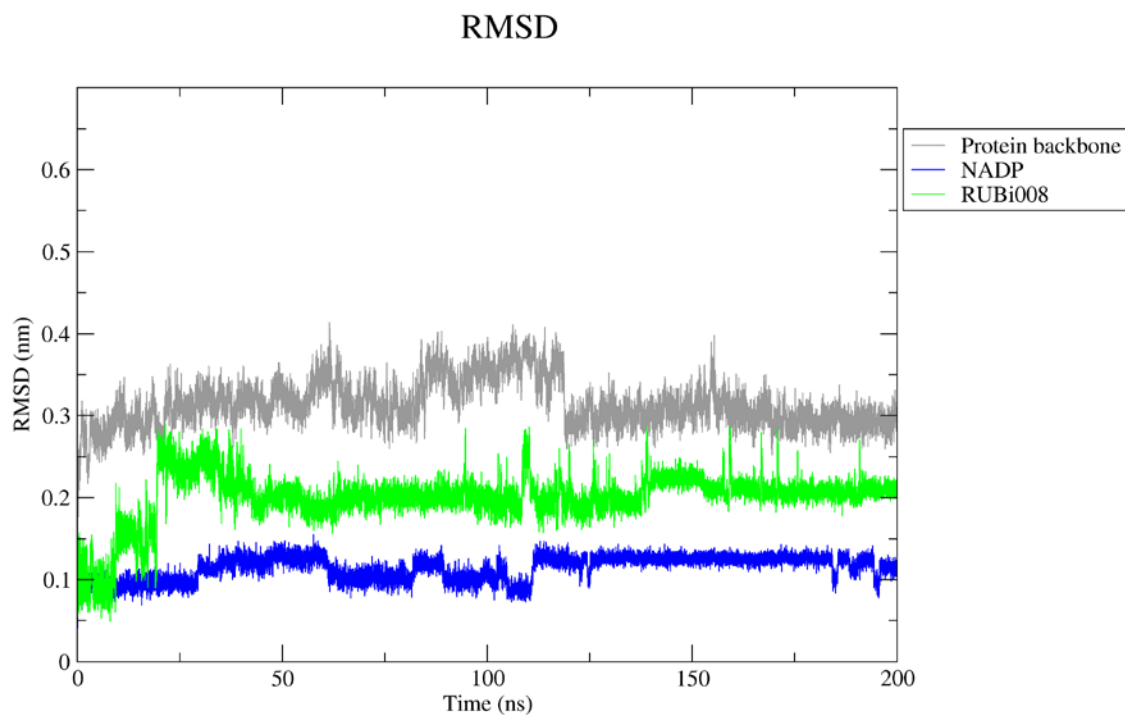

**Figure 7J:** Time dependent Root Mean Square Deviation (RMSD) of the backbone atoms of the apo protein, NADP, and ligand. The protein is coloured is coloured grey, the NADP cofactor coloured blue, and RUBi008 green.

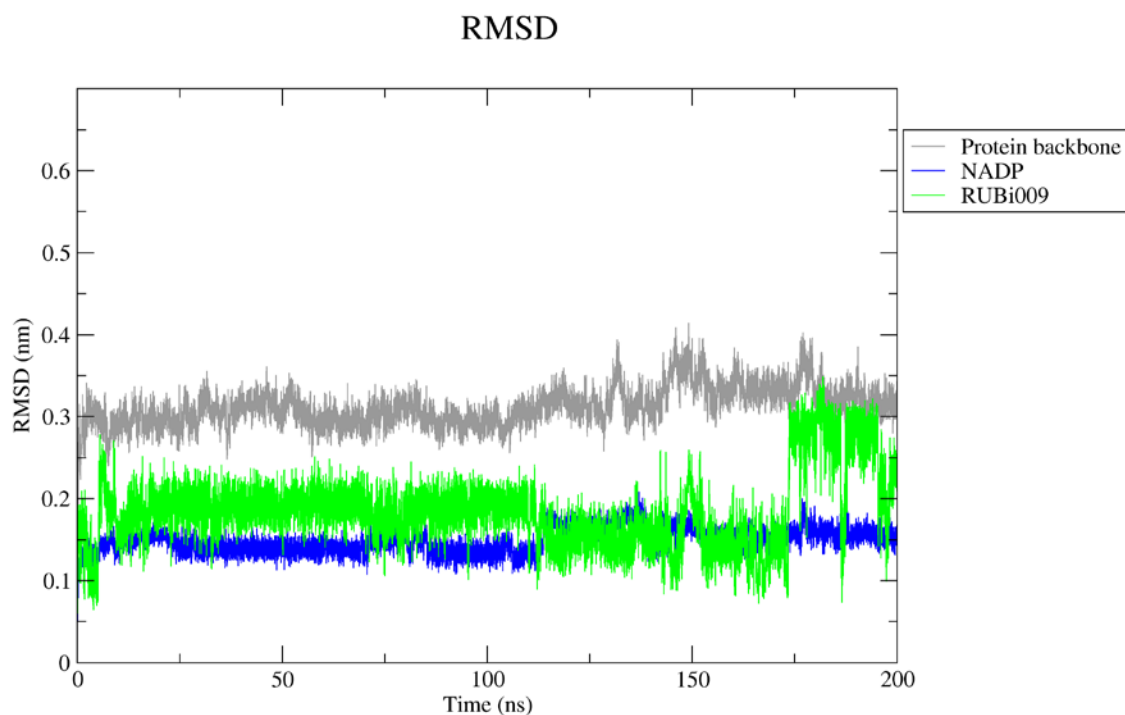

**Figure 7K:** Time dependent Root Mean Square Deviation (RMSD) of the backbone atoms of the apo protein, NADP, and ligand. The protein is coloured is coloured grey, the NADP cofactor coloured blue, and RUBi009 green.

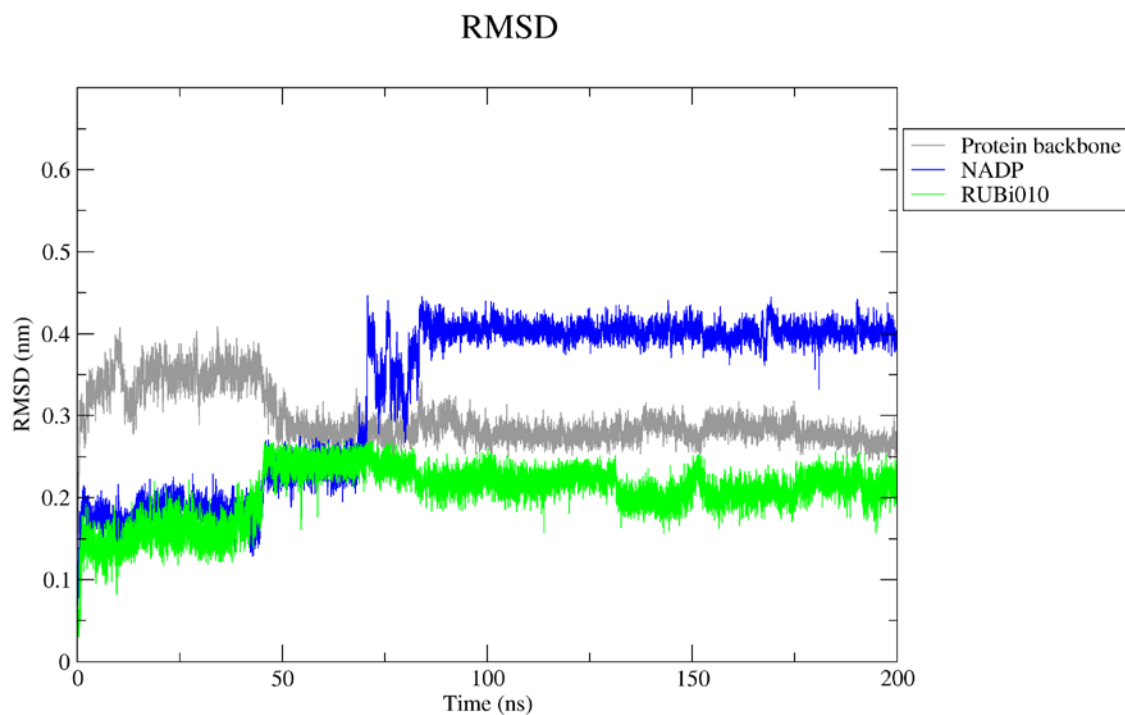

**Figure 7L:** Time dependent Root Mean Square Deviation (RMSD) of the backbone atoms of the apo protein, NADP, and ligand. The protein is coloured is coloured grey, the NADP cofactor coloured blue, and RUBi010 green.

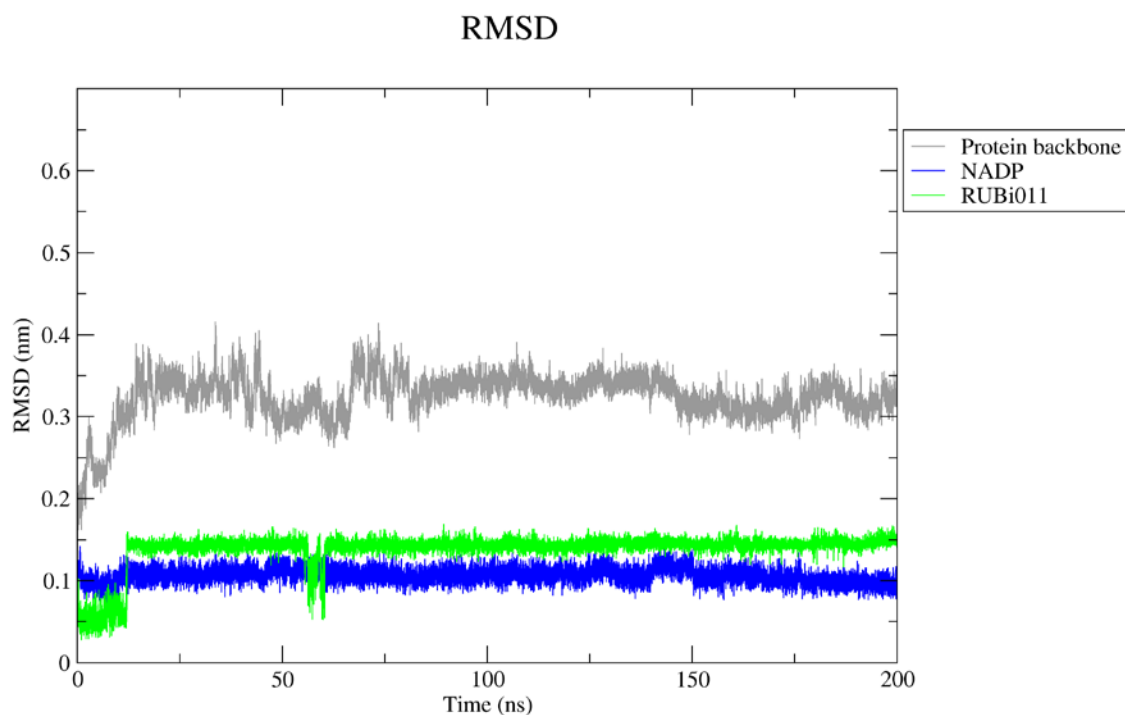

**Figure 7M:** Time dependent Root Mean Square Deviation (RMSD) of the backbone atoms of the apo protein, NADP, and ligand. The protein is coloured is coloured grey, the NADP cofactor coloured blue, and RUBi011 green.

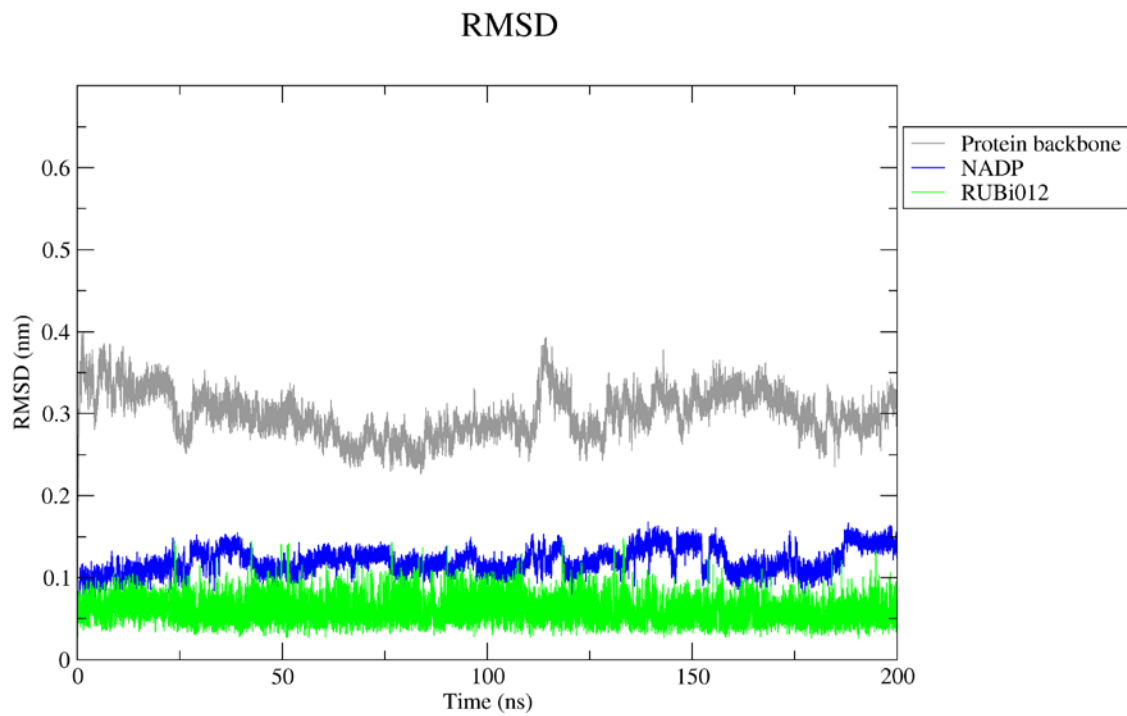

**Figure 7N:** Time dependent Root Mean Square Deviation (RMSD) of the backbone atoms of the apo protein, NADP, and ligand. The protein is coloured is coloured grey, the NADP cofactor coloured blue, and RUBi012 green.

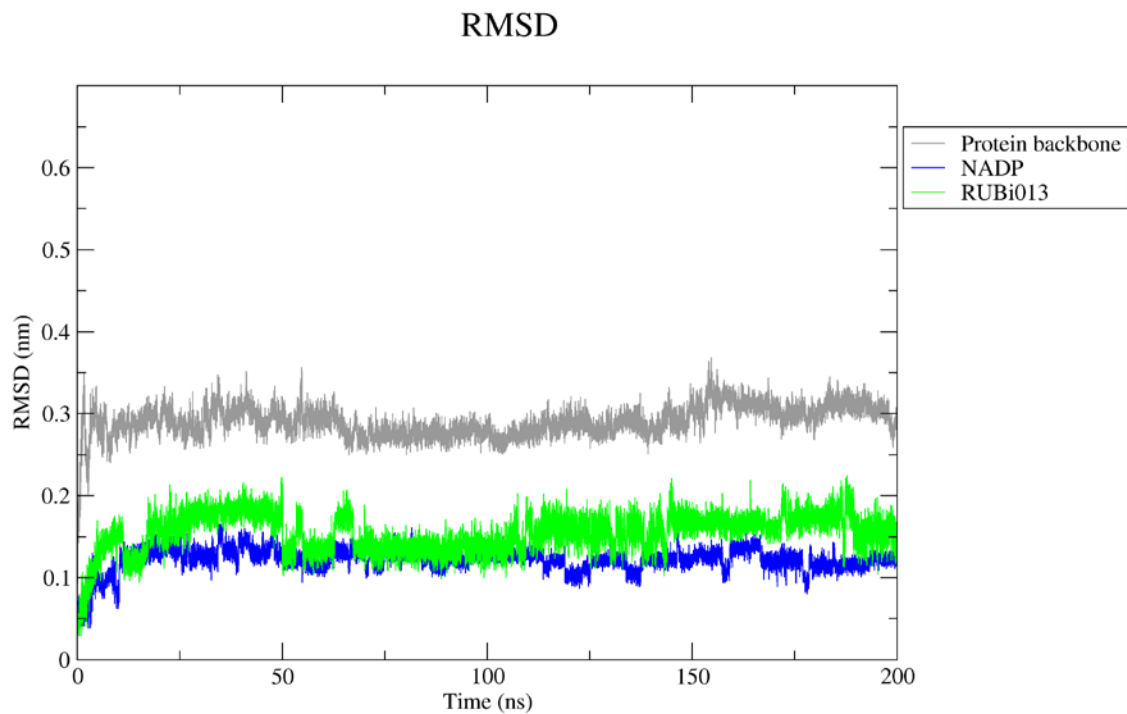

**Figure 7O:** Time dependent Root Mean Square Deviation (RMSD) of the backbone atoms of the apo protein, NADP, and ligand. The protein is coloured is coloured grey, the NADP cofactor coloured blue, and RUBi013 green.

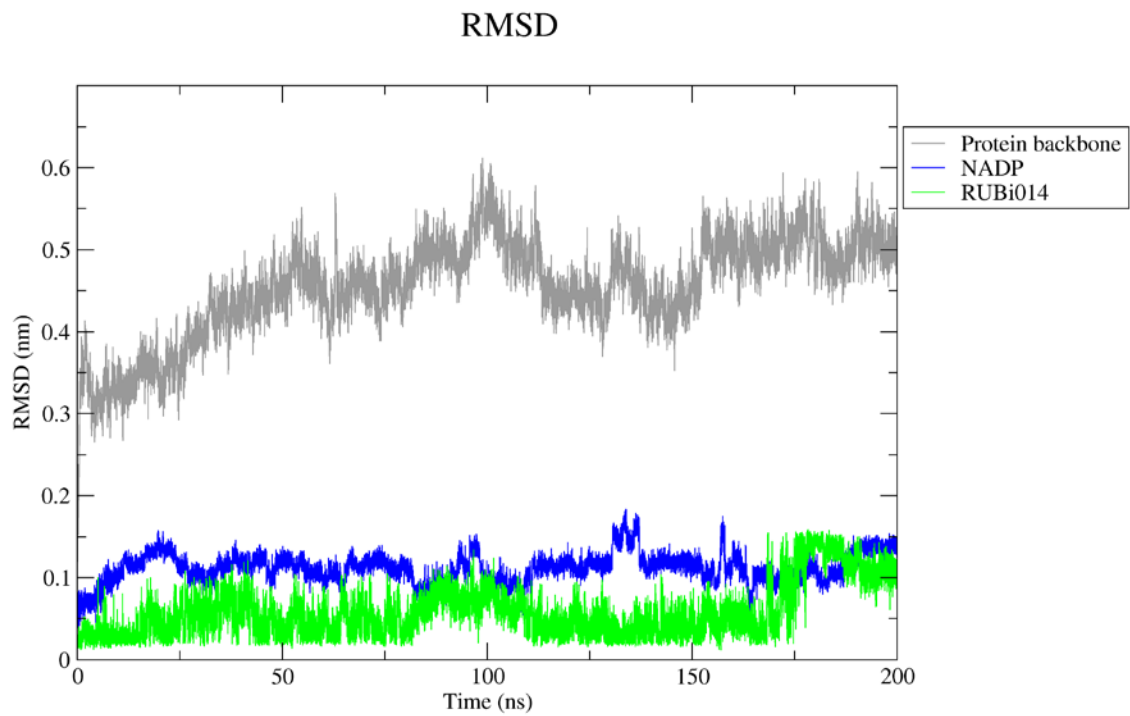

**Figure 7P:** Time dependent Root Mean Square Deviation (RMSD) of the backbone atoms of the apo protein, NADP, and ligand. The protein is coloured is coloured grey, the NADP cofactor coloured blue, and RUBi014 green.

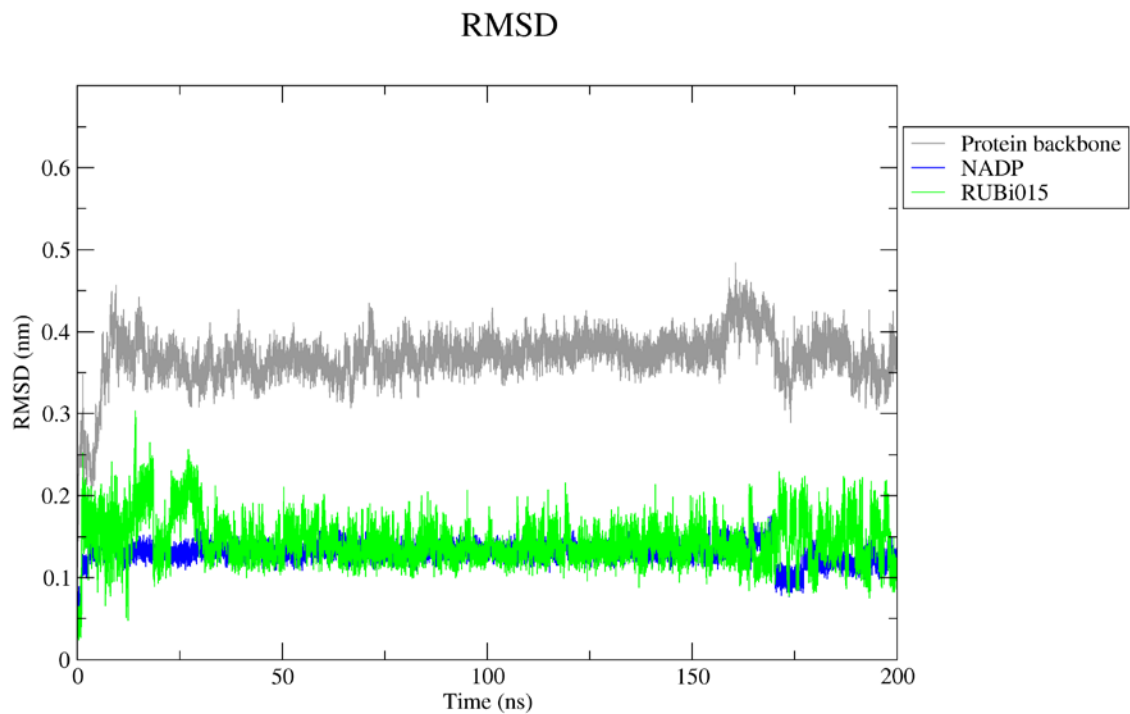

**Figure 7R:** Time dependent Root Mean Square Deviation (RMSD) of the backbone atoms of the apo protein, NADP, and ligand. The protein is coloured is coloured grey, the NADP cofactor coloured blue, and RUBi015 green.

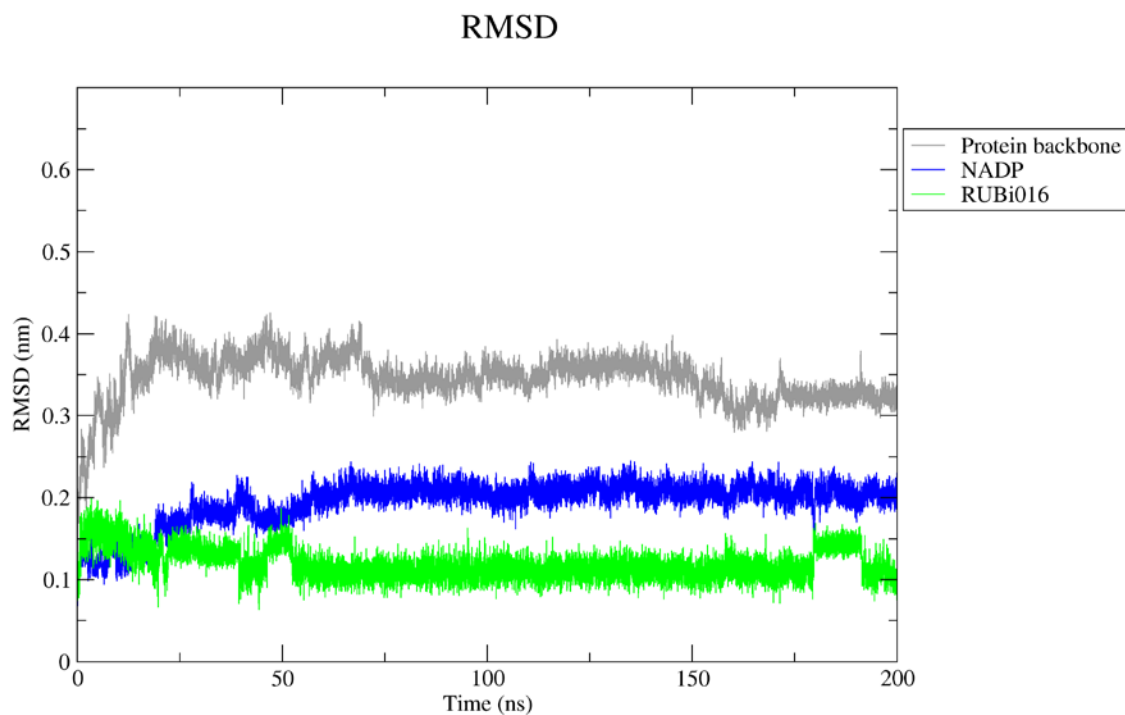

**Figure 7S:** Time dependent Root Mean Square Deviation (RMSD) of the backbone atoms of the apo protein, NADP, and ligand. The protein is coloured is coloured grey, the NADP cofactor coloured blue, and RUBi016 green.

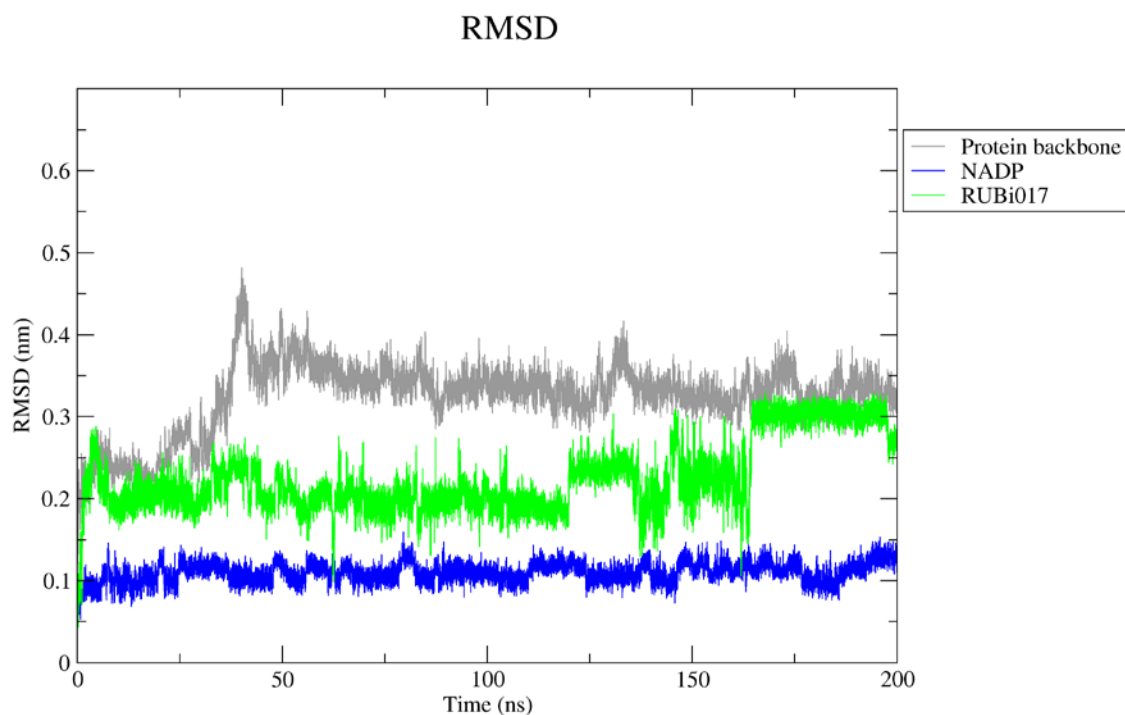

**Figure 7T:** Time dependent Root Mean Square Deviation (RMSD) of the backbone atoms of the apo protein, NADP, and ligand. The protein is coloured is coloured grey, the NADP cofactor coloured blue, and RUBi017 green.



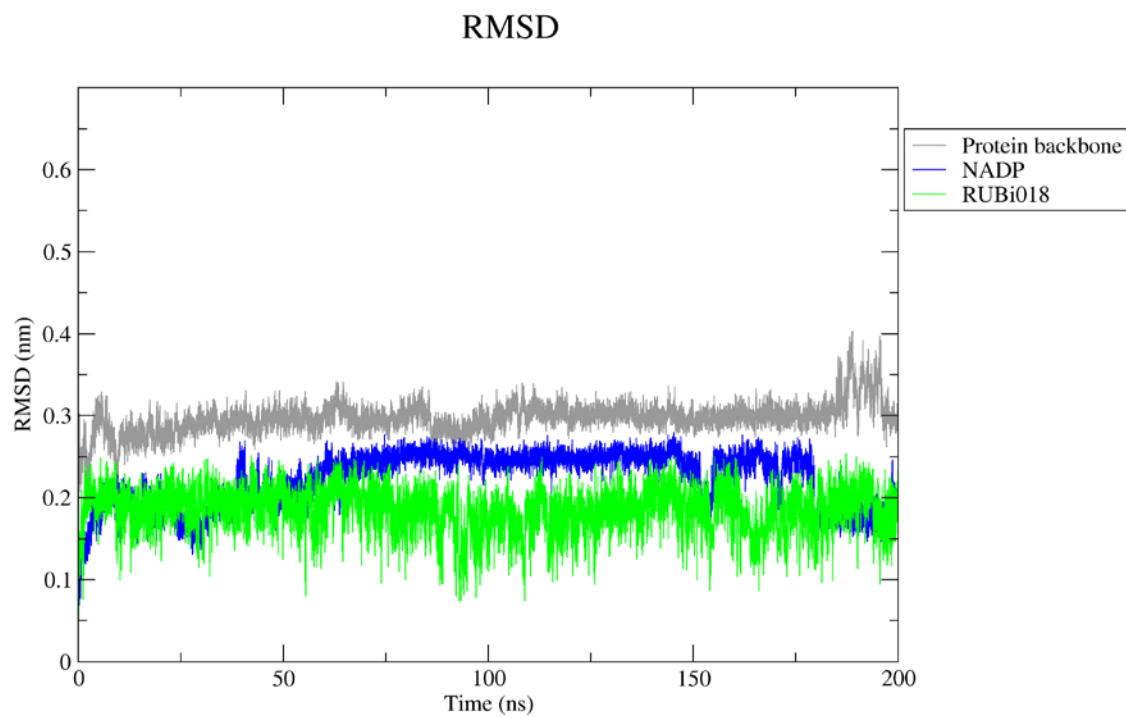

**Figure 7U:** Time dependent Root Mean Square Deviation (RMSD) of the backbone atoms of the apo protein, NADP cofactor and ligand. The protein is coloured is coloured grey, the NADP cofactor coloured blue, and RUBi018 green.

**Supplementary Figure S8:** Rg values of 18 *TbPTR1*-ligand complexes compared to apo protein

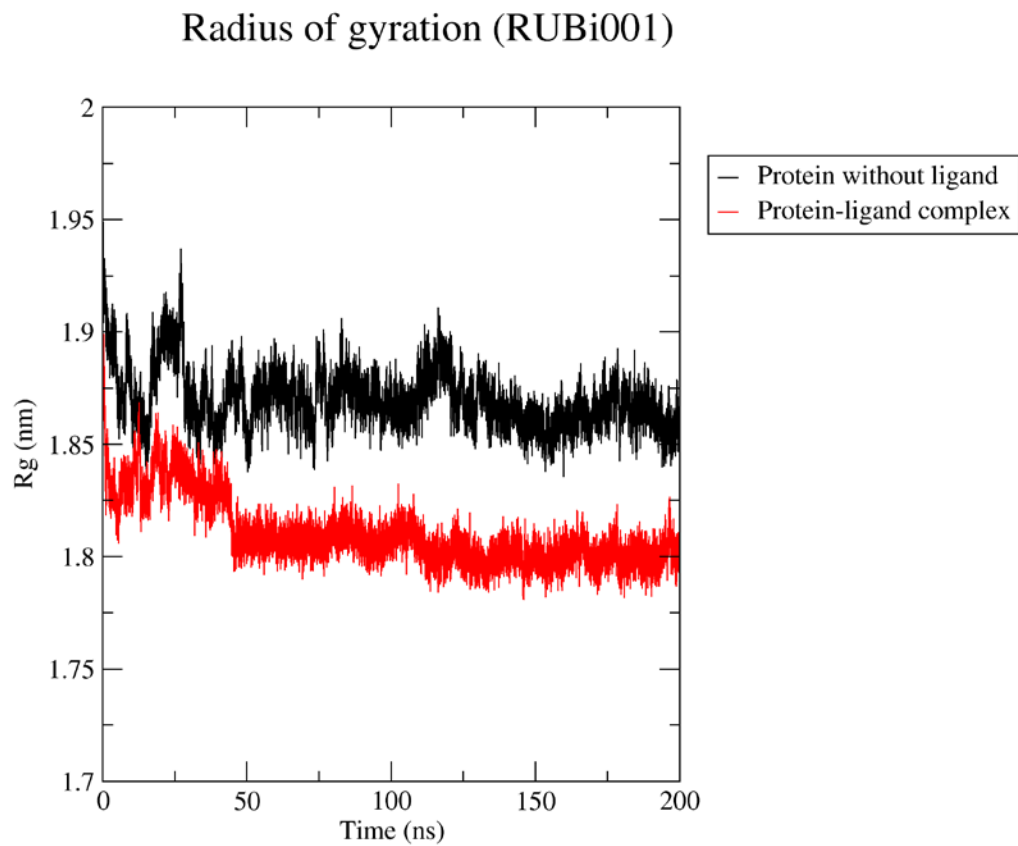

**Figure 8A:** The *TbPTR1* radius of gyration (Rg) of based on C-alpha atoms versus time at 300K. The protein without the ligand is colored black while the *TbPTR1*-RUBi001 complex is colored red.

## Radius of gyration (RUBi002)

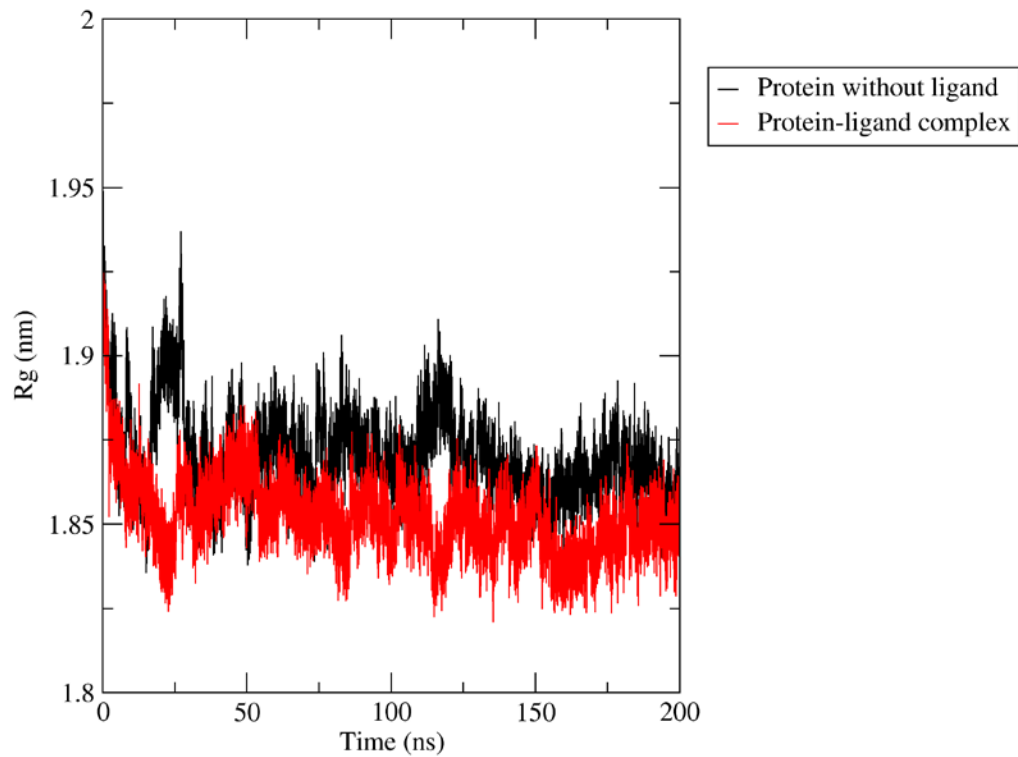

**Figure 8B:** The *TbPTR1* radius of gyration ( $R_g$ ) of based on C-alpha atoms versus time at 300K. The protein without the ligand is colored black while the *TbPTR1*-RUBi002 complex is colored red.

### Radius of gyration (RUBi003)

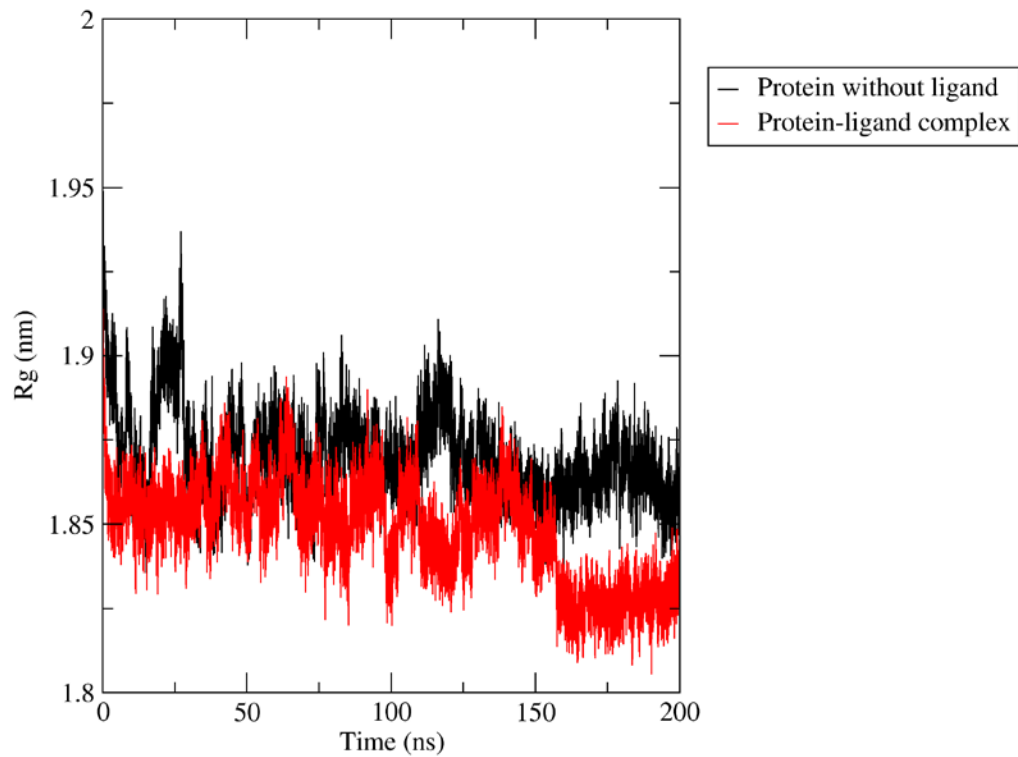

**Figure 8C:** The *TbPTR1* radius of gyration ( $R_g$ ) of based on C-alpha atoms versus time at 300K. The protein without the ligand is colored black while the *TbPTR1*-RUBi003 complex is colored red.

### Radius of gyration (RUBi004)

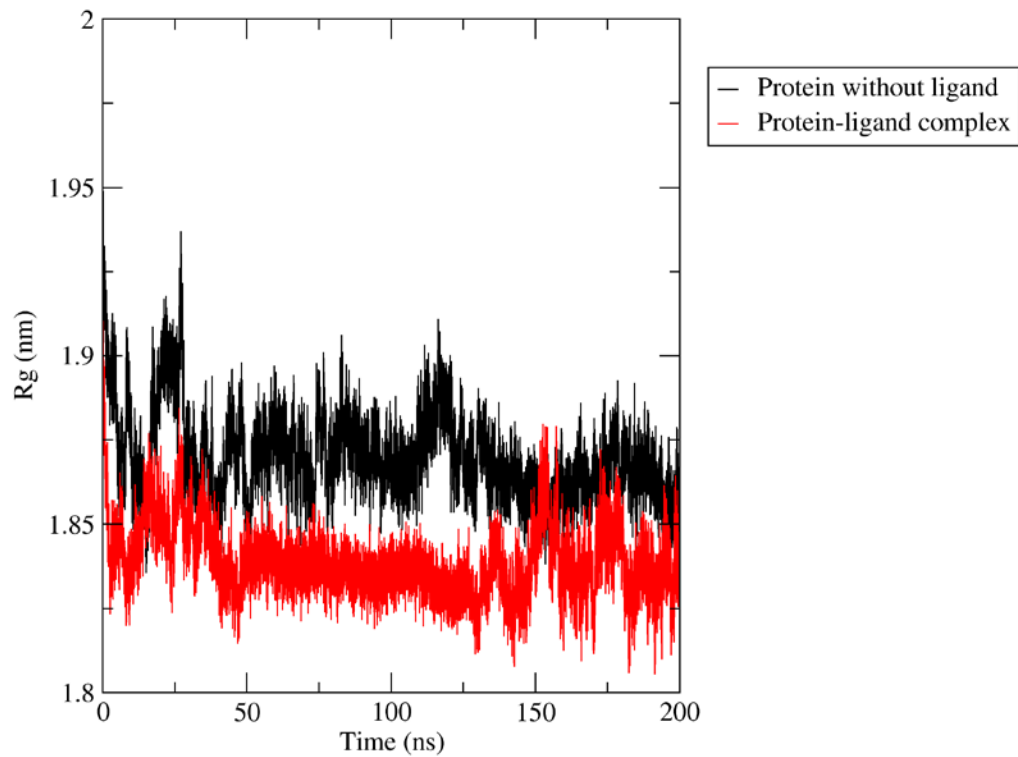

**Figure 8D:** The *TbPTR1* radius of gyration ( $R_g$ ) of based on C-alpha atoms versus time at 300K. The protein without the ligand is colored black while the *TbPTR1*-RUBi004 complex is colored red.

## Radius of gyration (RUBi005)

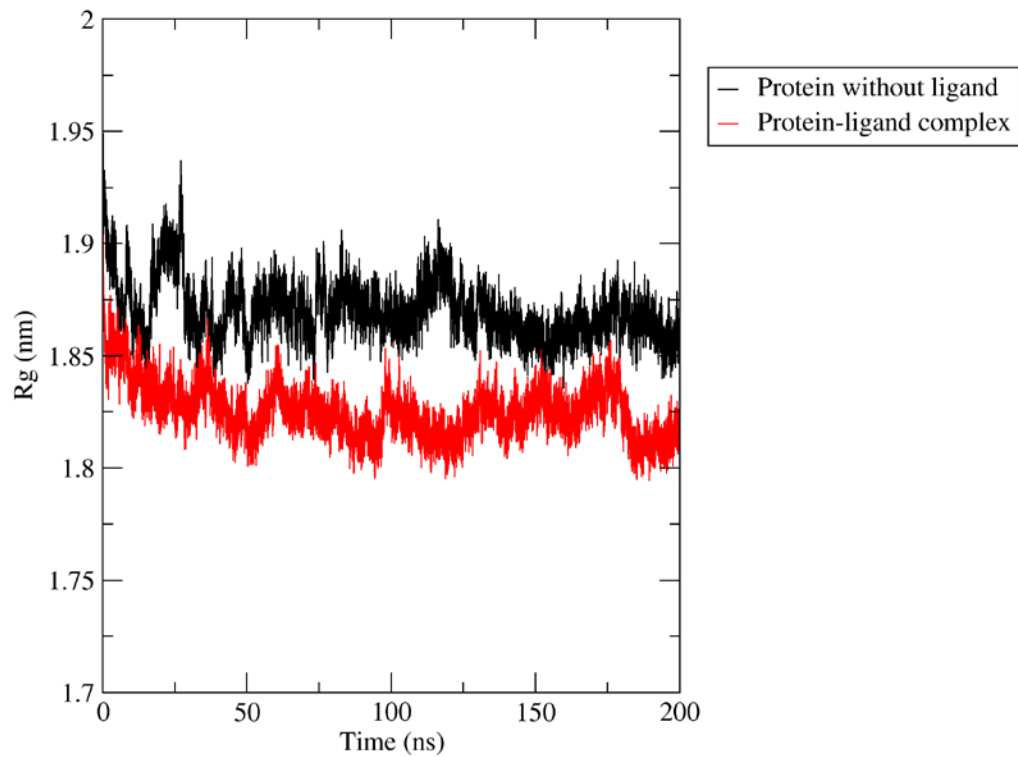

**Figure 8E:** The *TbPTR1* radius of gyration ( $R_g$ ) of based on C-alpha atoms versus time at 300K. The protein without the ligand is colored black while the *TbPTR1*-RUBi005 complex is colored red.

### Radius of gyration (RUBi006)

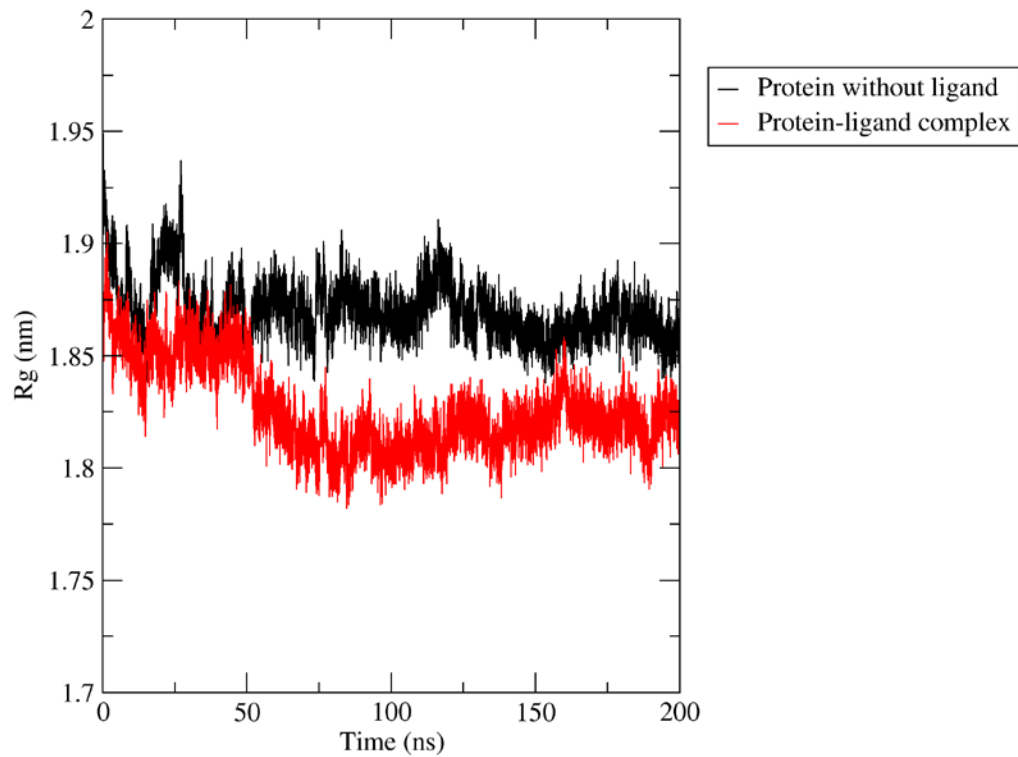

**Figure 8F:** The *TbPTR1* radius of gyration ( $R_g$ ) of based on C-alpha atoms versus time at 300K. The protein without the ligand is colored black while the *TbPTR1*-RUBi006 complex is colored red.

### Radius of gyration (RUBi007)

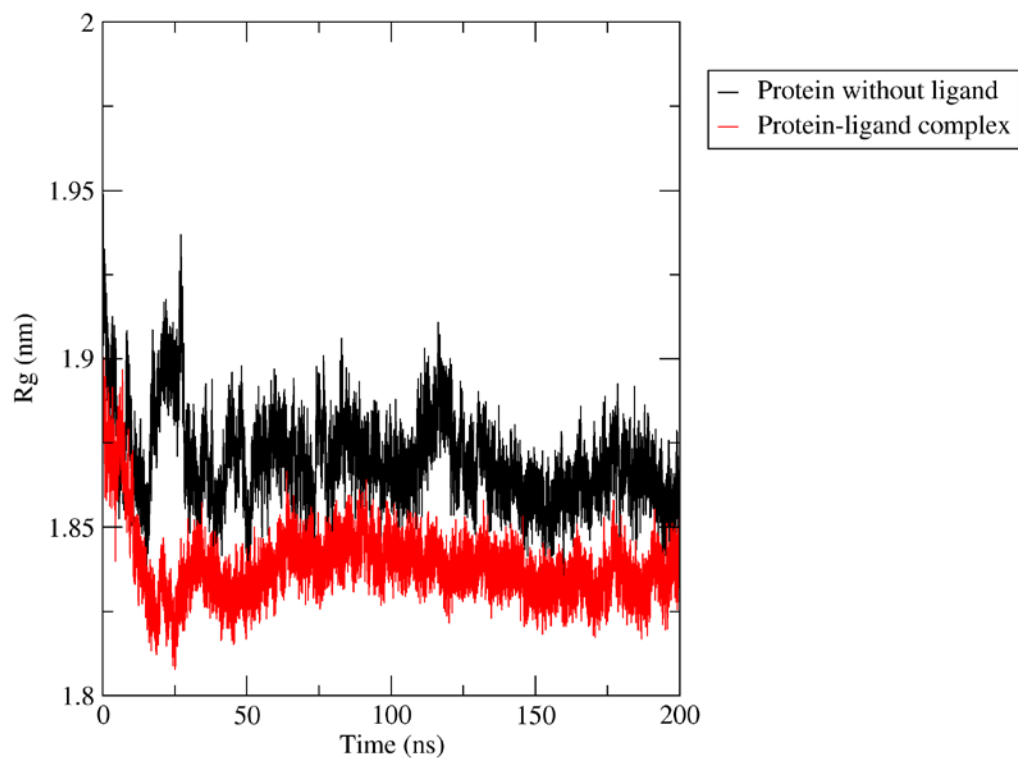

**Figure 8G:** The *TbPTR1* radius of gyration ( $R_g$ ) of based on C-alpha atoms versus time at 300K. The protein without the ligand is colored black while the *TbPTR1*-RUBi007 complex is colored red.



### Radius of gyration (RUBi008)

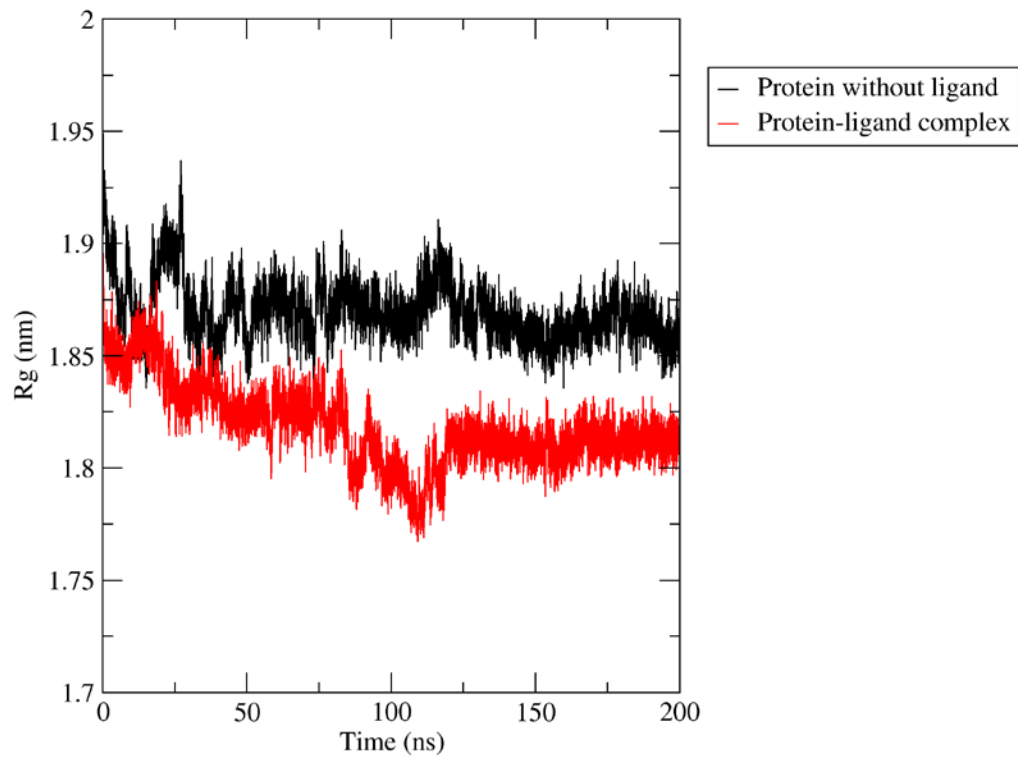

**Figure 8H:** The *TbPTR1* radius of gyration ( $R_g$ ) of based on C-alpha atoms versus time at 300K. The protein without the ligand is colored black while the *TbPTR1*-RUBi008 complex is colored red.

### Radius of gyration (RUBi009)

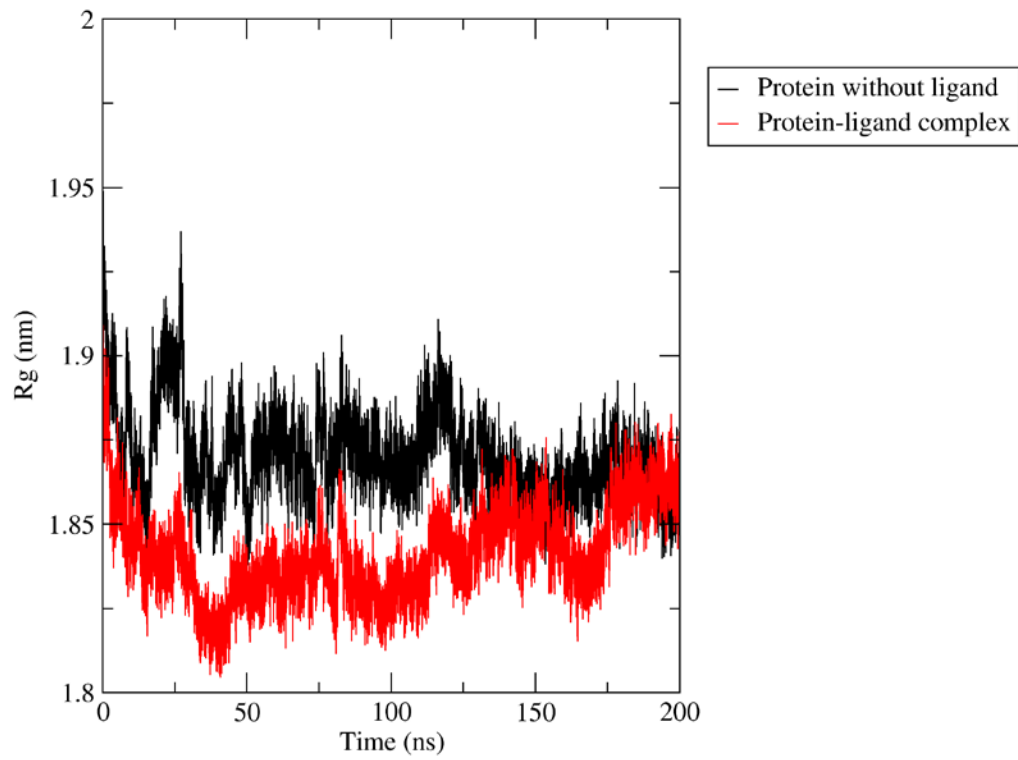

**Figure 8I:** The *TbPTR1* radius of gyration ( $R_g$ ) of based on C-alpha atoms versus time at 300K. The protein without the ligand is colored black while the *TbPTR1*-RUBi009 complex is colored red.

## Radius of gyration (RUBi010)

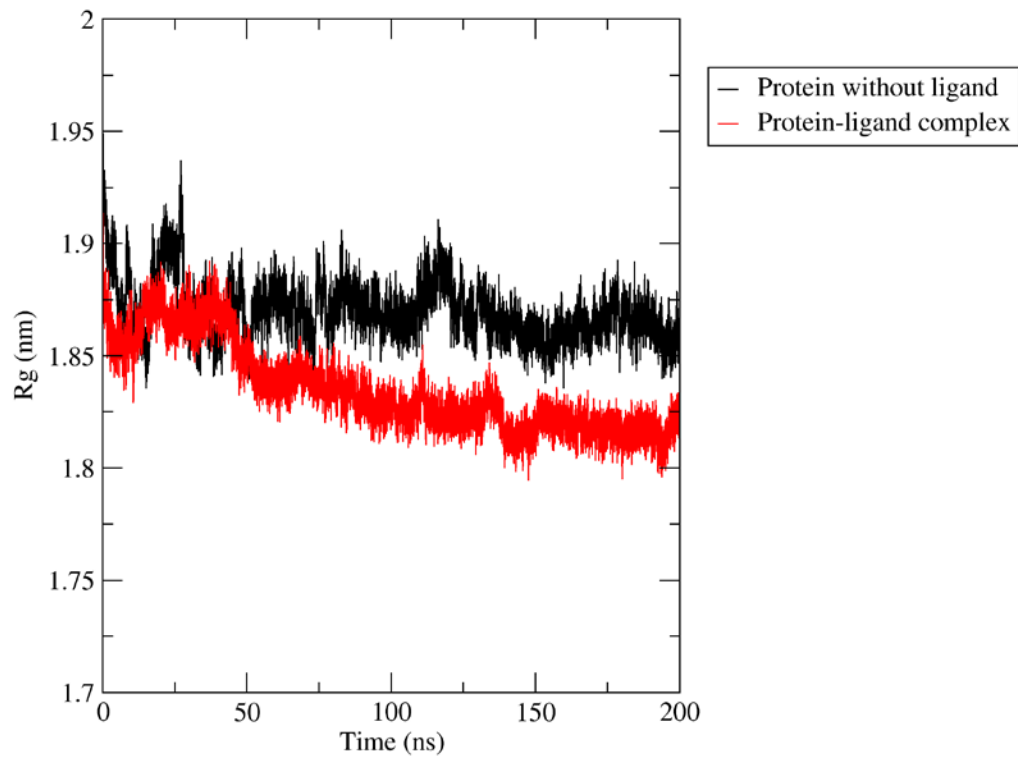

**Figure 8J:** The *TbPTR1* radius of gyration ( $R_g$ ) of based on C-alpha atoms versus time at 300K. The protein without the ligand is colored black while the *TbPTR1*-RUBi010 complex is colored red.

## Radius of gyration (RUBi011)

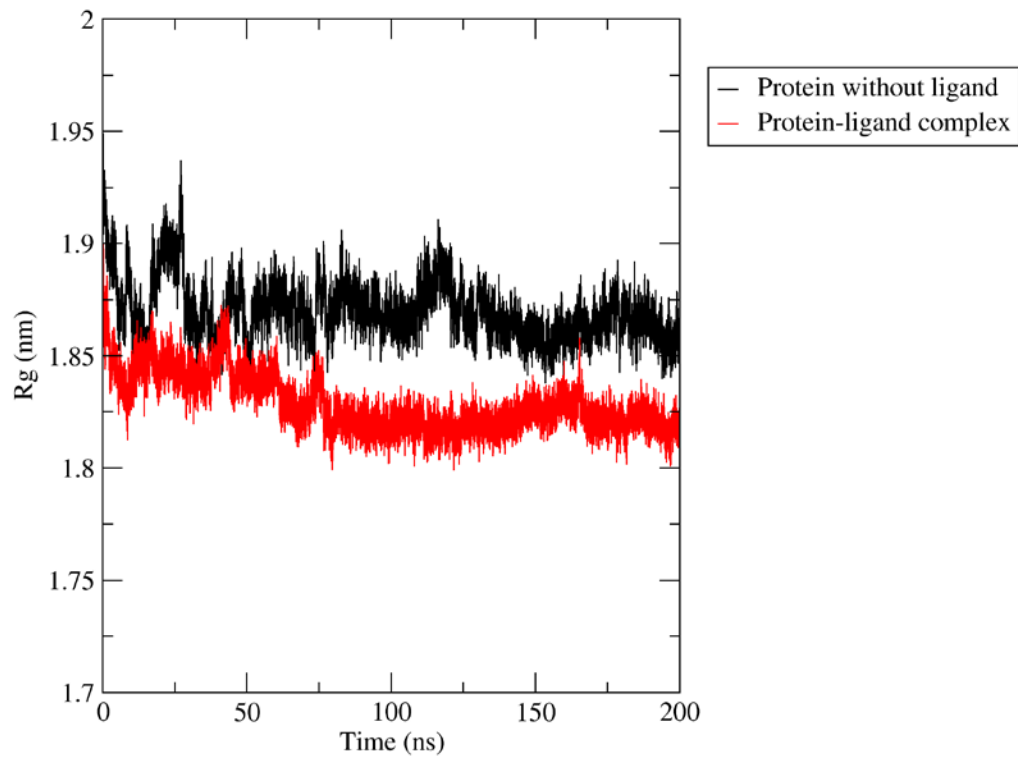

**Figure 8K:** The *TbPTR1* radius of gyration ( $R_g$ ) of based on C-alpha atoms versus time at 300K. The protein without the ligand is colored black while the *TbPTR1*-RUBi011 complex is colored red.

## Radius of gyration (RUBi012)

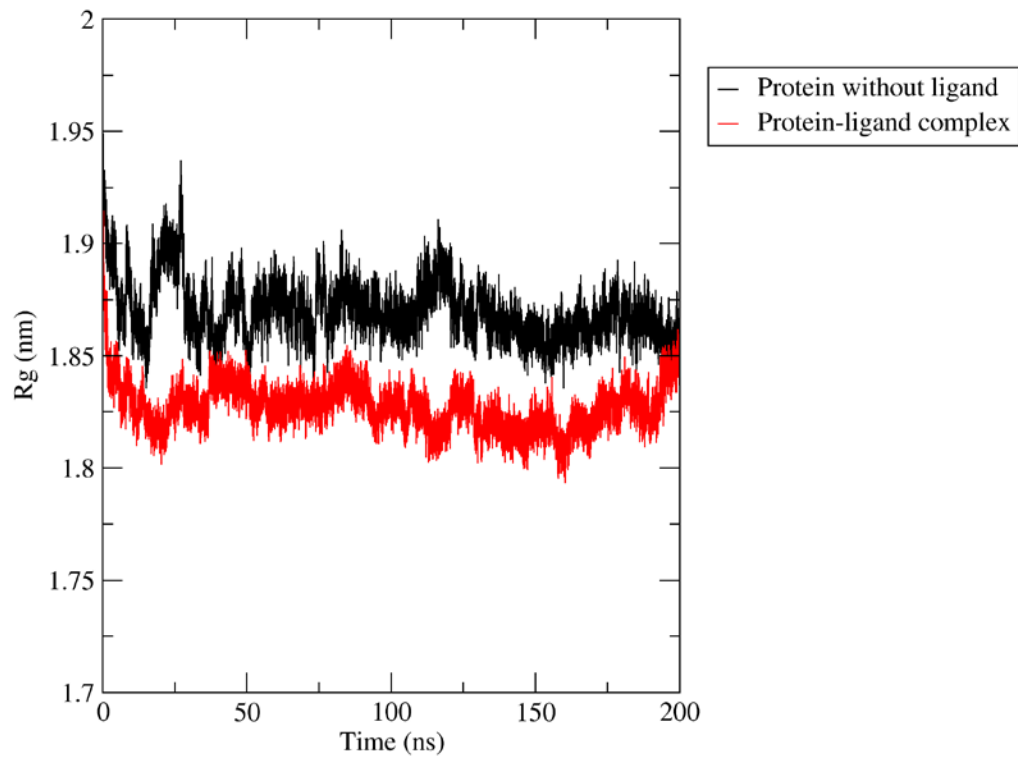

**Figure 8L:** The *TbPTR1* radius of gyration ( $R_g$ ) of based on C-alpha atoms versus time at 300K. The protein without the ligand is colored black while the *TbPTR1*-RUBi012 complex is colored red.

### Radius of gyration (RUBi013)

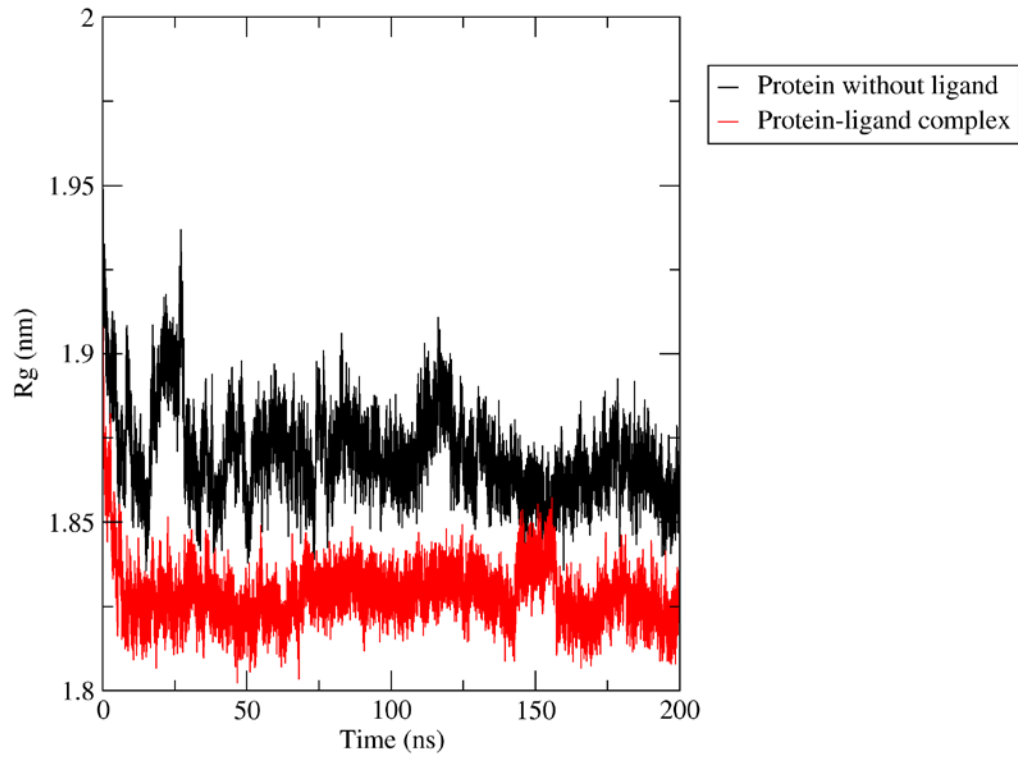

**Figure 8M:** The *TbPTR1* radius of gyration ( $R_g$ ) of based on C-alpha atoms versus time at 300K. The protein without the ligand is colored black while the *TbPTR1*-RUBi013 complex is colored red.

### Radius of gyration (RUBi014)

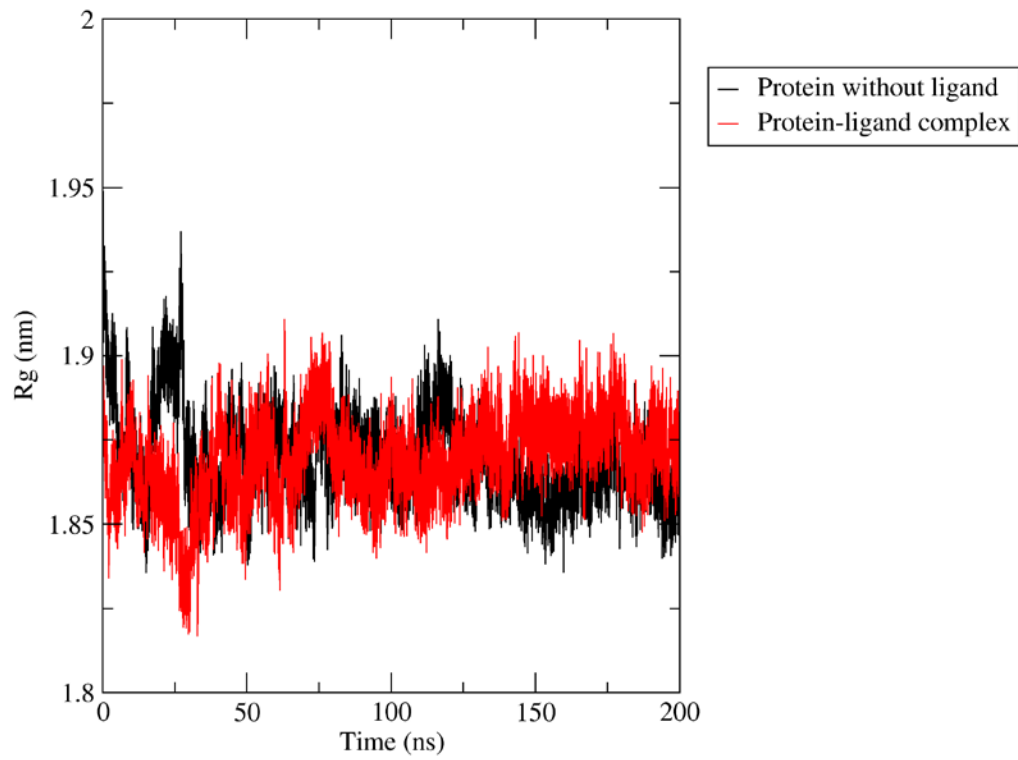

**Figure 8N:** The *TbPTR1* radius of gyration ( $R_g$ ) of based on C-alpha atoms versus time at 300K. The protein without the ligand is colored black while the *TbPTR1*-RUBi014 complex is colored red.

### Radius of gyration (RUBi015)

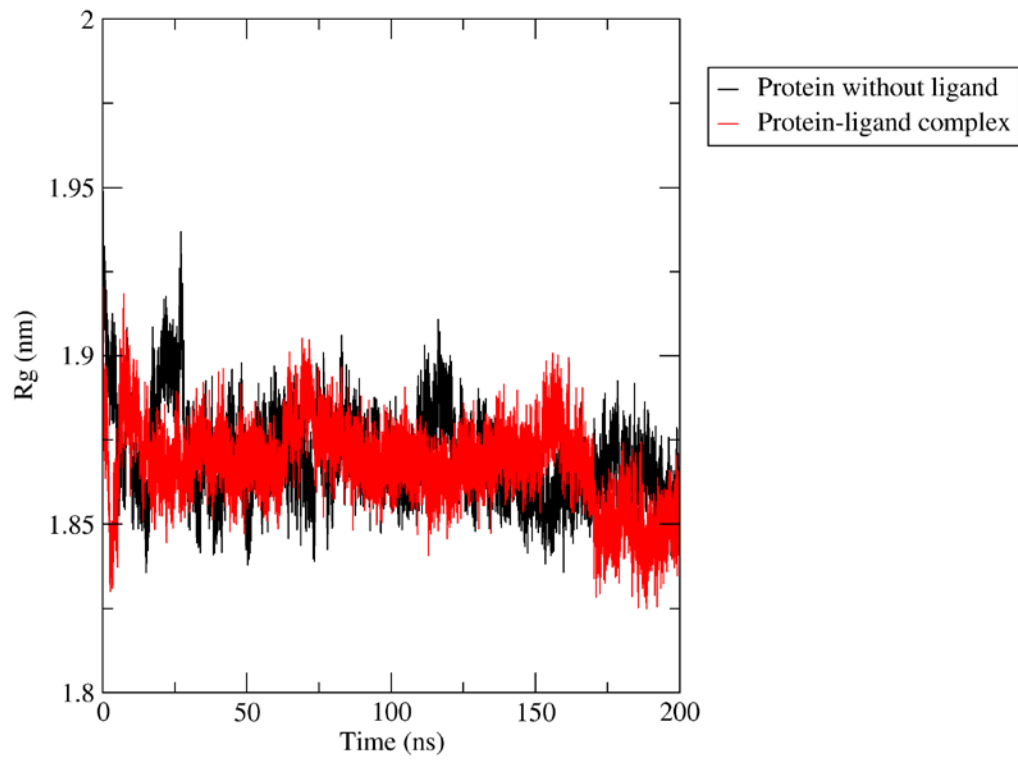

**Figure 80:** The *TbPTR1* radius of gyration ( $R_g$ ) of based on C-alpha atoms versus time at 300K. The protein without the ligand is colored black while the *TbPTR1*-RUBi015 complex is colored red.



### Radius of gyration (RUBi016)

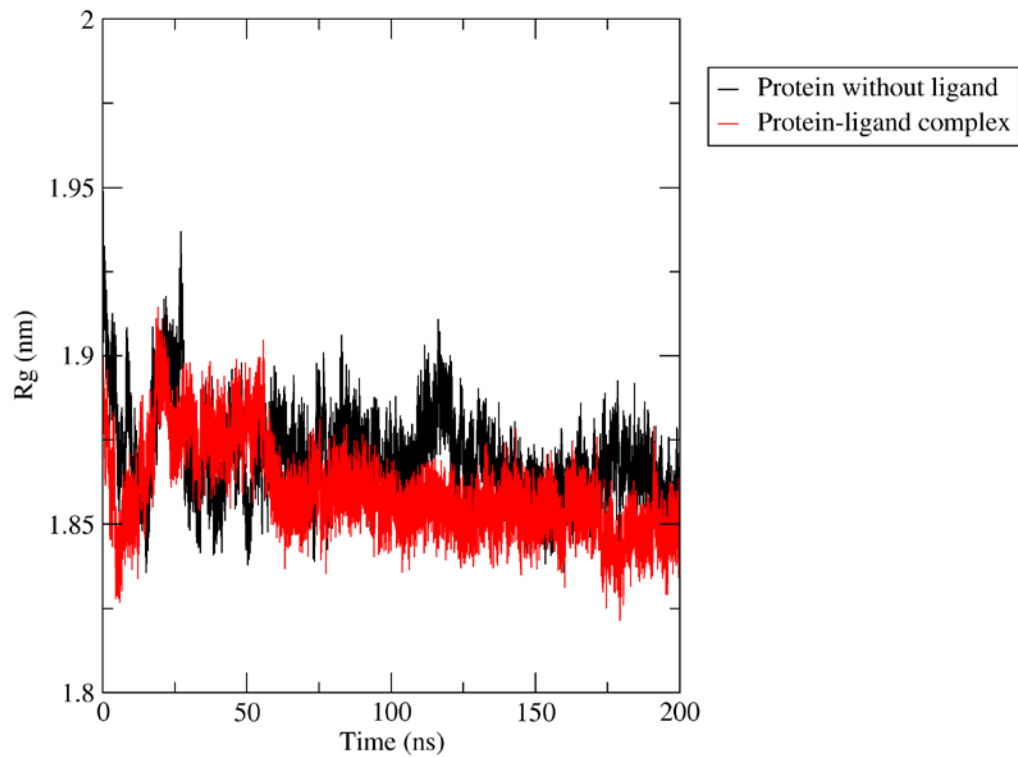

**Figure 8P:** The *TbPTR1* radius of gyration ( $R_g$ ) of based on C-alpha atoms versus time at 300K. The protein without the ligand is colored black while the *TbPTR1*-RUBi016 complex is colored red.

### Radius of gyration (RUBi017)

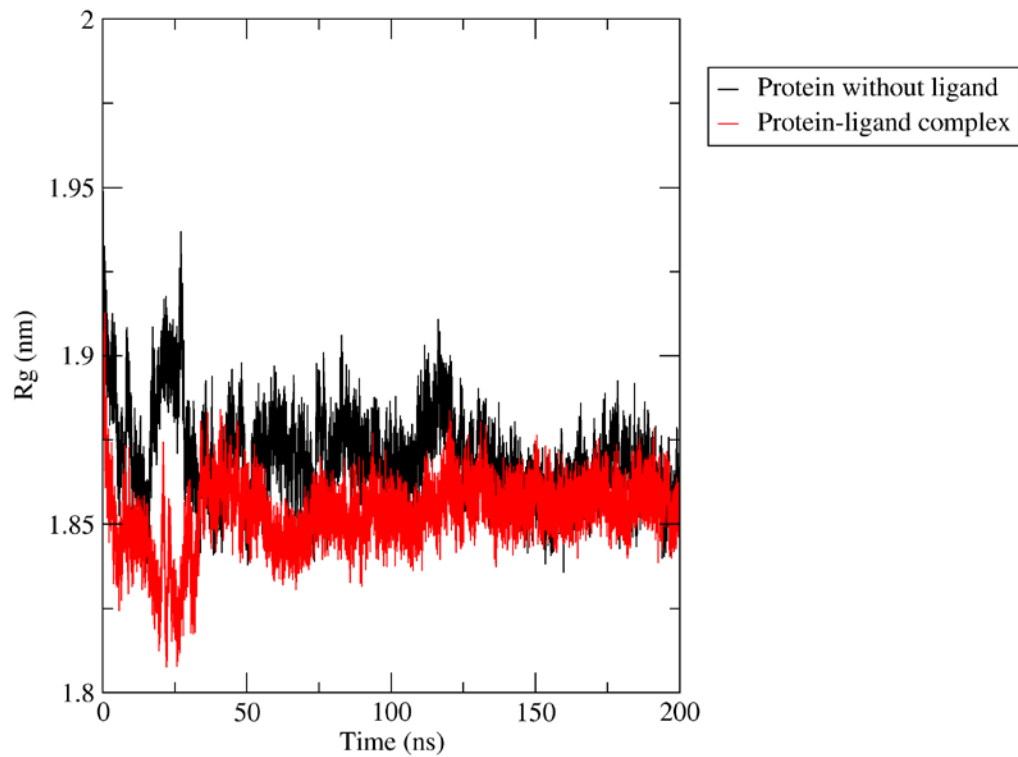

**Figure 8R:** The *TbPTR1* radius of gyration ( $R_g$ ) of based on C-alpha atoms versus time at 300K. The protein without the ligand is colored black while the *TbPTR1*-RUBi017 complex is colored red.

### Radius of gyration (RUBi018)

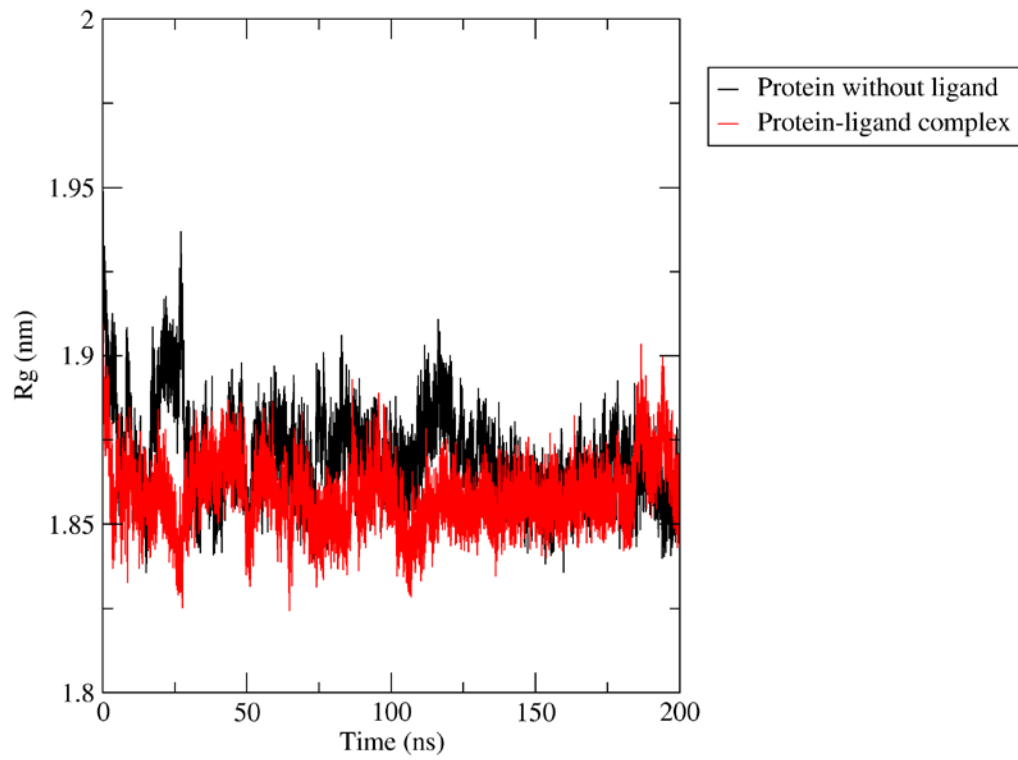

**Figure 8S:** The *TbPTR1* radius of gyration ( $R_g$ ) of based on C-alpha atoms versus time at 300K. The protein without the ligand is colored black while the *TbPTR1*-RUBi018 complex is colored red.

**Supplementary Figure S9:** The time evolution of the number of intermolecular hydrogen bonds formed between the compounds and *TbPTR1* protein during simulation

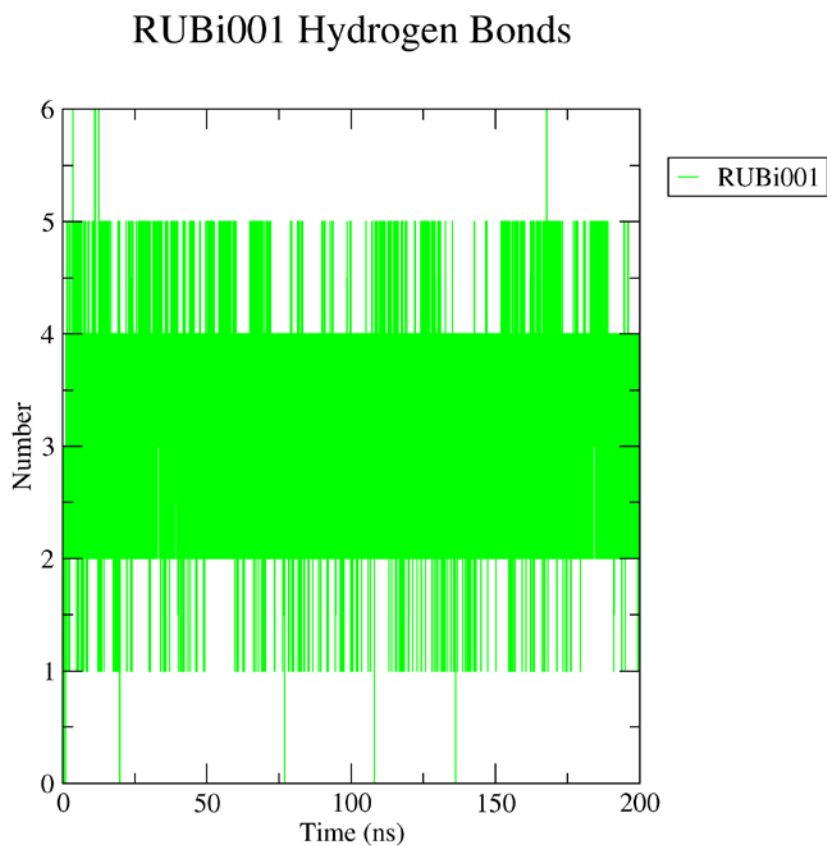

**Figure 9A:** The time evolution of the number of intermolecular hydrogen bonds formed between the RUBi001 and *TbPTR1* protein in the *TbPTR1*-RUBi001 complex

## RUBi002 Hydrogen Bonds

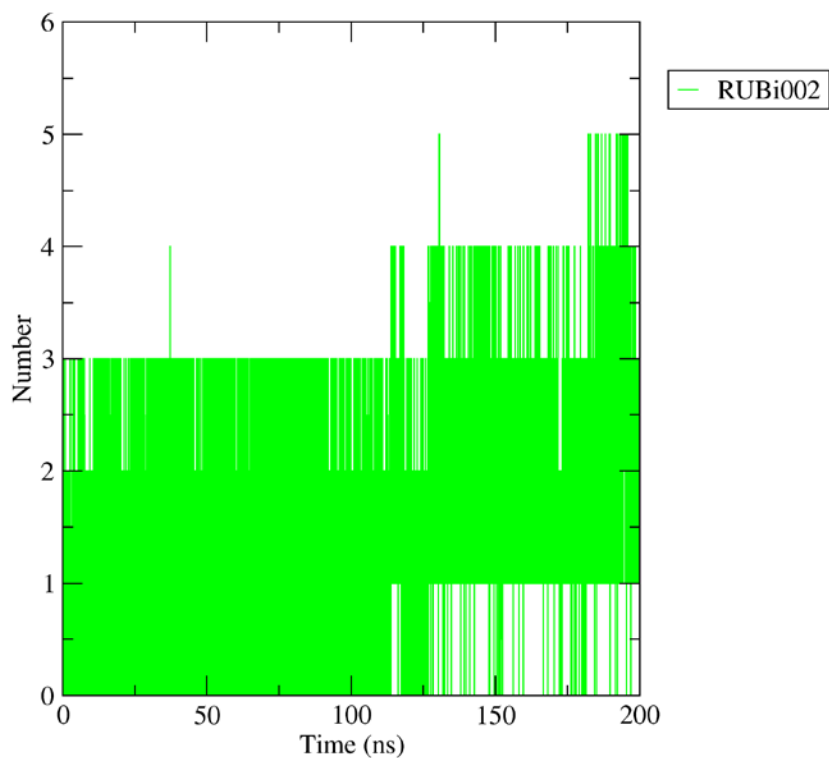

**Figure 9B:** The time evolution of the number of intermolecular hydrogen bonds formed between the RUBi002 and *TbPTR1* protein in the *TbPTR1*-RUBi002 complex

## RUBi003 Hydrogen Bonds

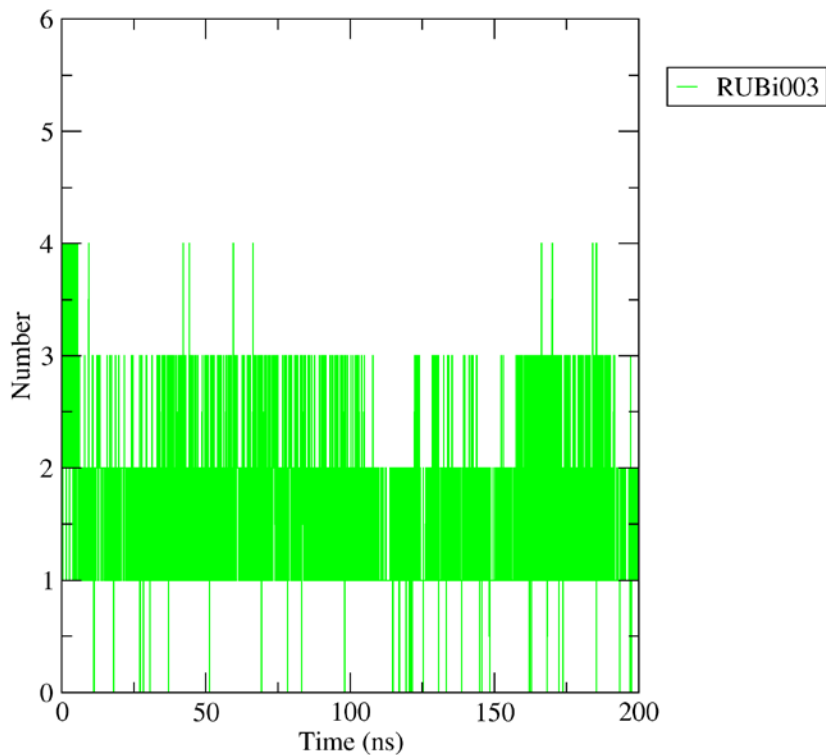

**Figure 9C:** The time evolution of the number of intermolecular hydrogen bonds formed between the RUBi003 and *TbPTR1* protein in the *TbPTR1*-RUBi003 complex

## RUBi004 Hydrogen Bonds

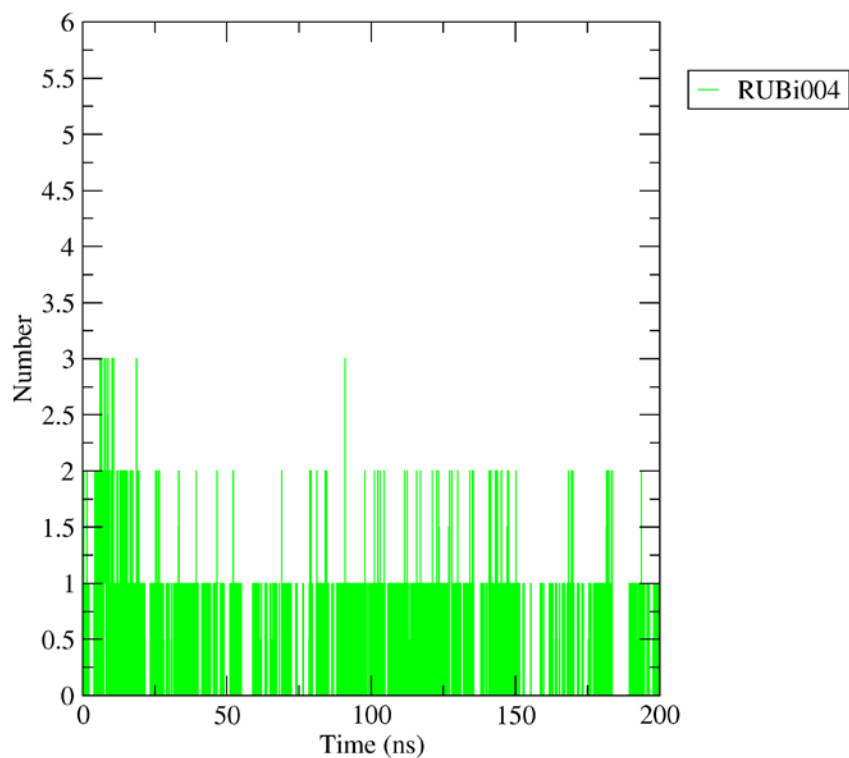

**Figure 9D:** The time evolution of the number of intermolecular hydrogen bonds formed between the RUBi004 and *TbPTR1* protein in the *TbPTR1*-RUBi004 complex

## RUBi005 Hydrogen Bonds

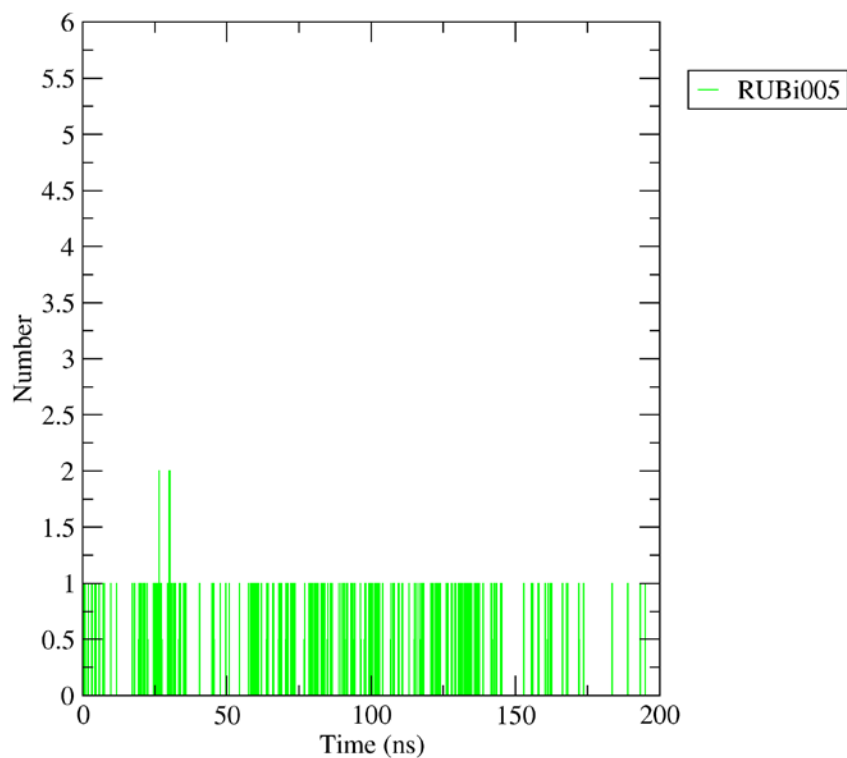

**Figure 9E:** The time evolution of the number of intermolecular hydrogen bonds formed between the RUBi005 and *TbPTR1* protein in the *TbPTR1*-RUBi005 complex



## RUBi006 Hydrogen Bonds

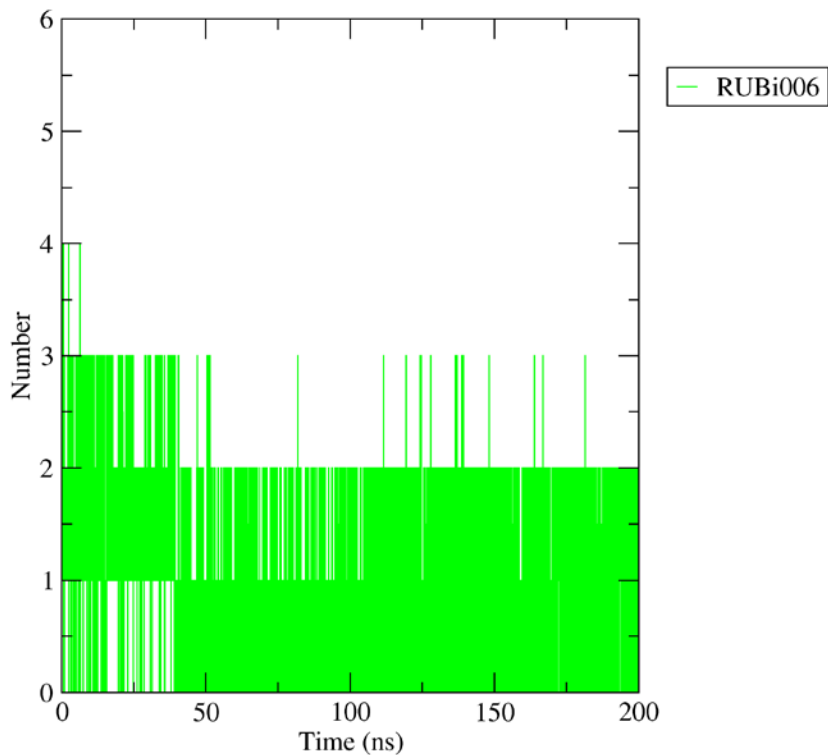

**Figure 9F:** The time evolution of the number of intermolecular hydrogen bonds formed between the RUBi006 and *TbPTR1* protein in the *TbPTR1*-RUBi006 complex

## RUBi007 Hydrogen Bonds

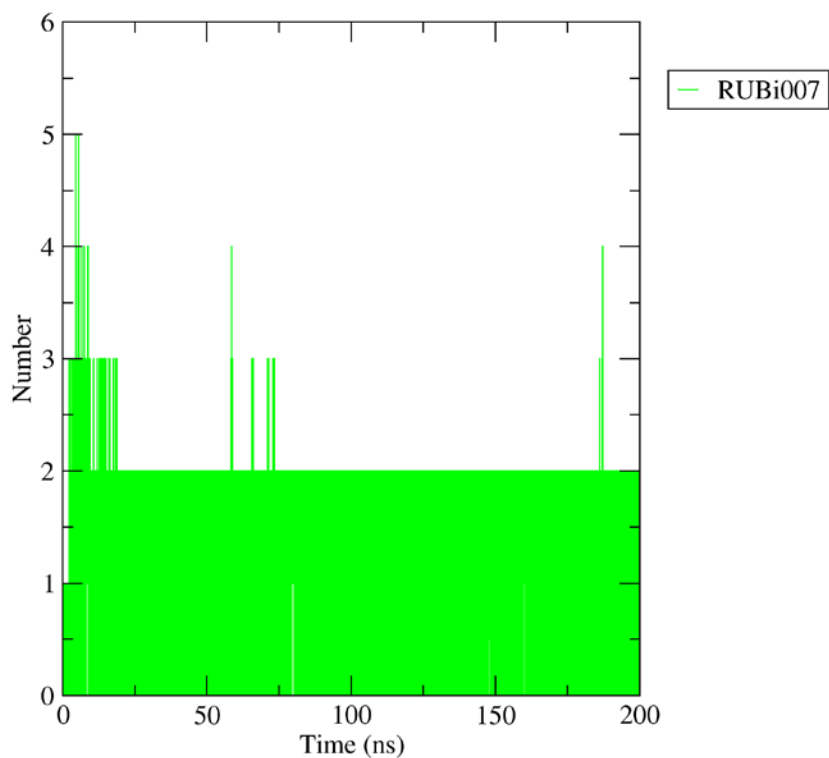

**Figure 9G:** The time evolution of the number of intermolecular hydrogen bonds formed between the RUBi007 and *TbPTR1* protein in the *TbPTR1*-RUBi007 complex

## RUBi008 Hydrogen Bonds

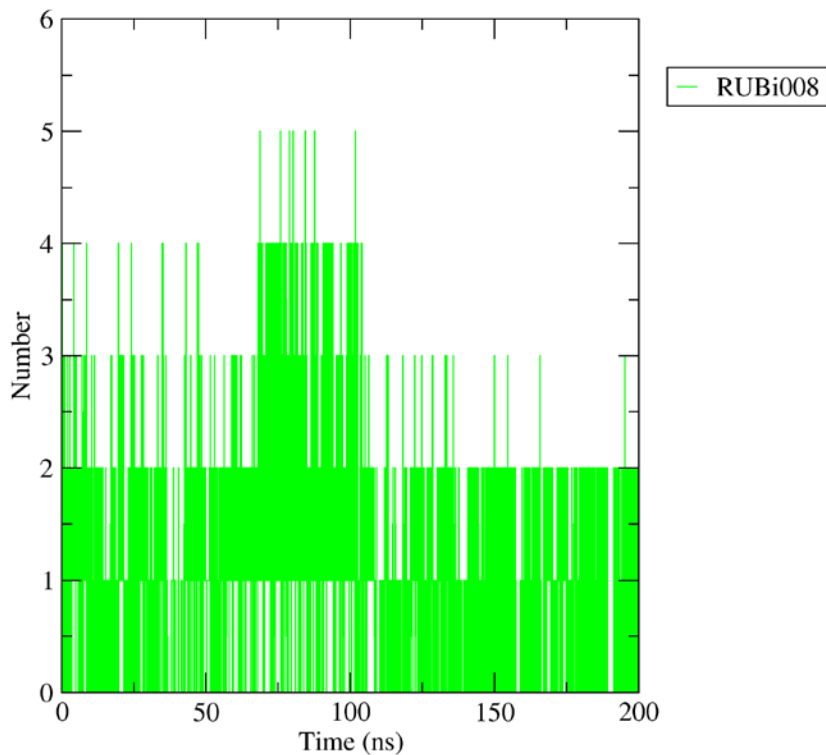

**Figure 9H:** The time evolution of the number of intermolecular hydrogen bonds formed between the RUBi008 and *TbPTR1* protein in the *TbPTR1*-RUBi008 complex

## RUBi009 Hydrogen Bonds

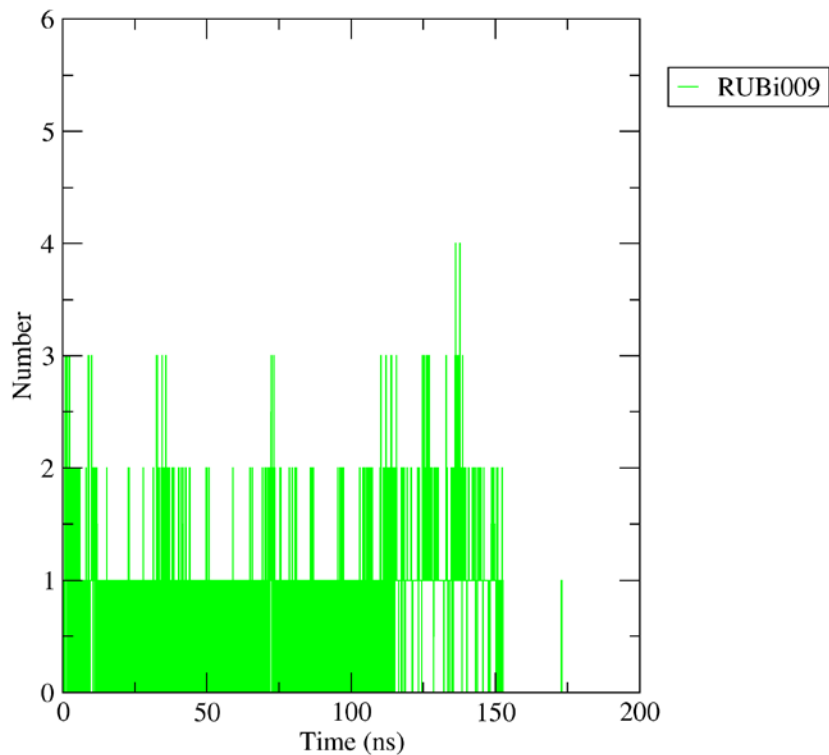

**Figure 9I:** The time evolution of the number of intermolecular hydrogen bonds formed between the RUBi009 and *TbPTR1* protein in the *TbPTR1*-RUBi009 complex

## RUBi010 Hydrogen Bonds

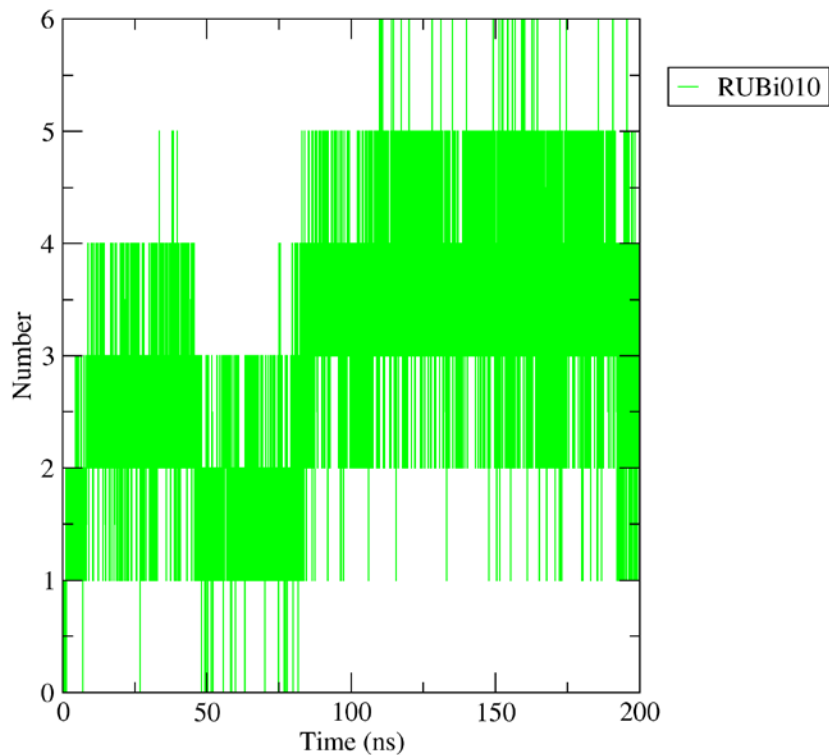

**Figure 9J:** The time evolution of the number of intermolecular hydrogen bonds formed between the RUBi010 and *TbPTR1* protein in the *TbPTR1*-RUBi010 complex

## RUBi011 Hydrogen Bonds

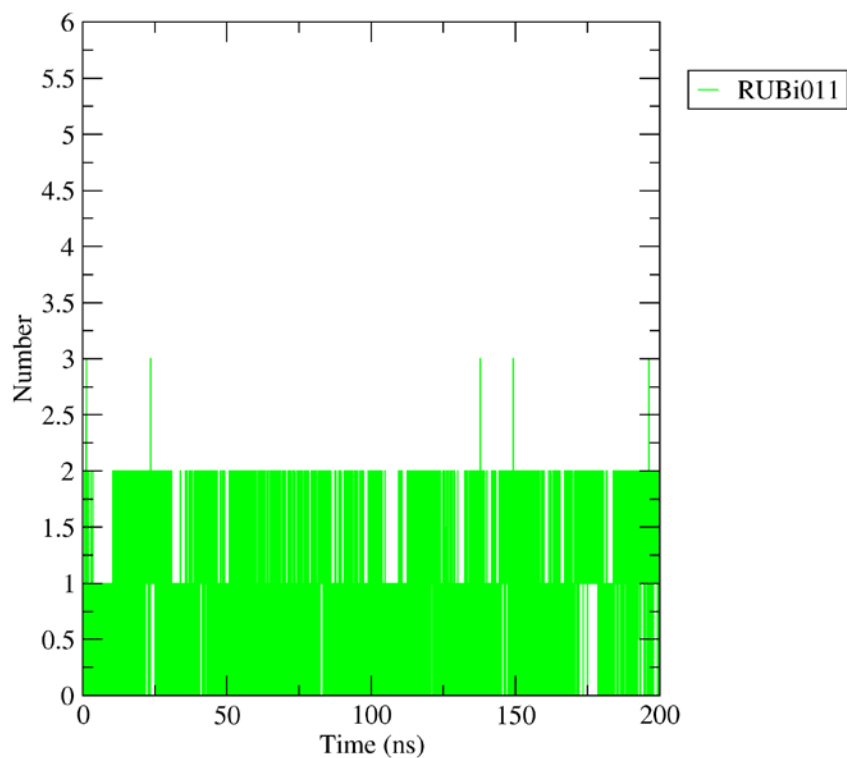

**Figure 9K:** The time evolution of the number of intermolecular hydrogen bonds formed between the RUBi011 and *TbPTR1* protein in the *TbPTR1*-RUBi011 complex

## RUBi012 Hydrogen Bonds

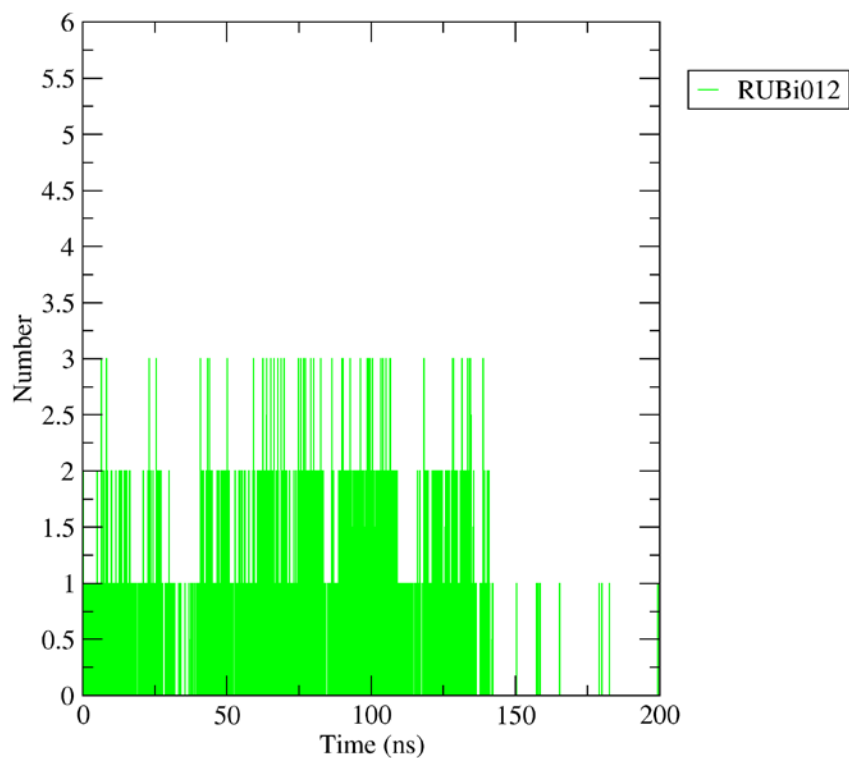

**Figure 9L:** The time evolution of the number of intermolecular hydrogen bonds formed between the RUBi012 and *TbPTR1* protein in the *TbPTR1*-RUBi012 complex

## RUBi013 Hydrogen Bonds

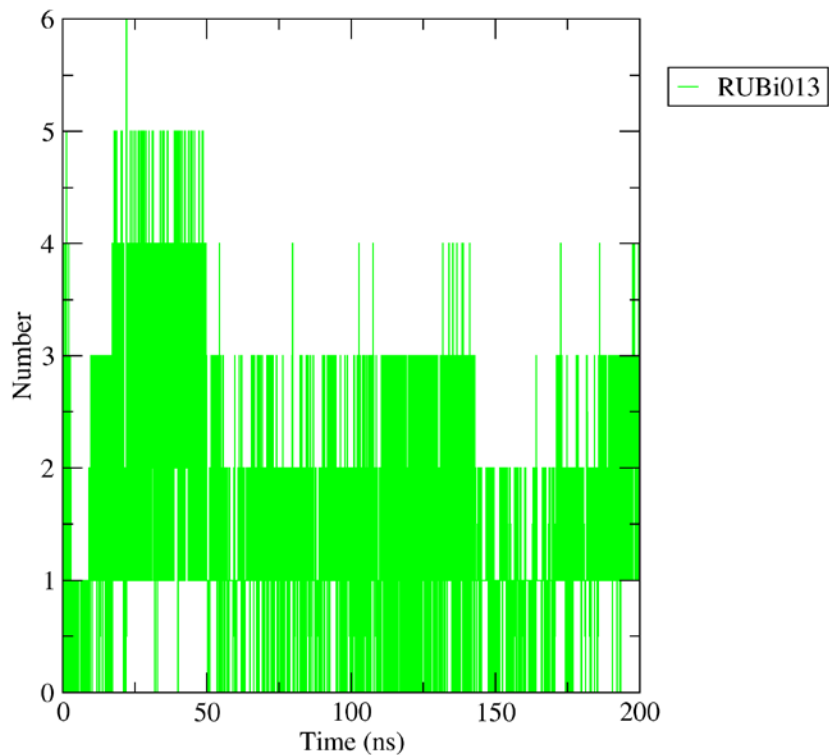

**Figure 9M:** The time evolution of the number of intermolecular hydrogen bonds formed between the RUBi013 and *TbPTR1* protein in the *TbPTR1*-RUBi013 complex



## RUBi014 Hydrogen Bonds

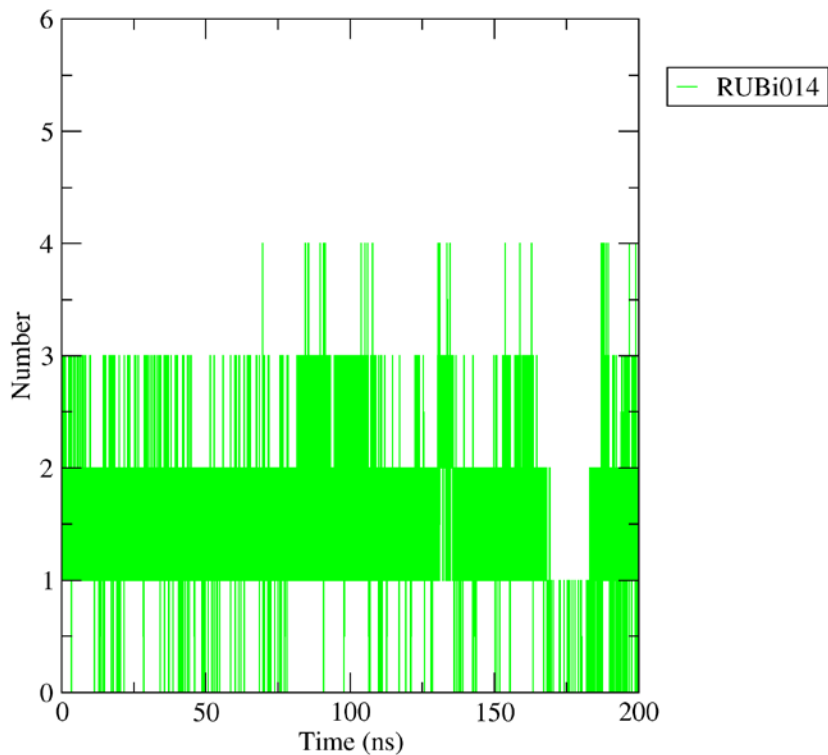

**Figure 9N:** The time evolution of the number of intermolecular hydrogen bonds formed between the RUBi014 and *TbPTR1* protein in the *TbPTR1*-RUBi014 complex

## RUBi015 Hydrogen Bonds

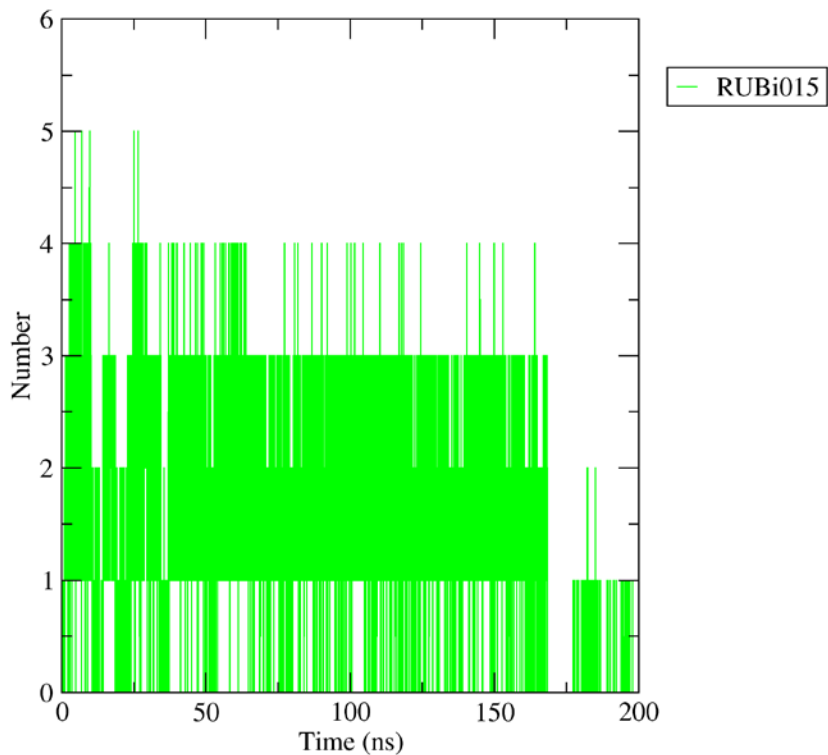

**Figure 90:** The time evolution of the number of intermolecular hydrogen bonds formed between the RUBi015 and *TbPTR1* protein in the *TbPTR1*-RUBi015 complex

## RUBi016 Hydrogen Bonds

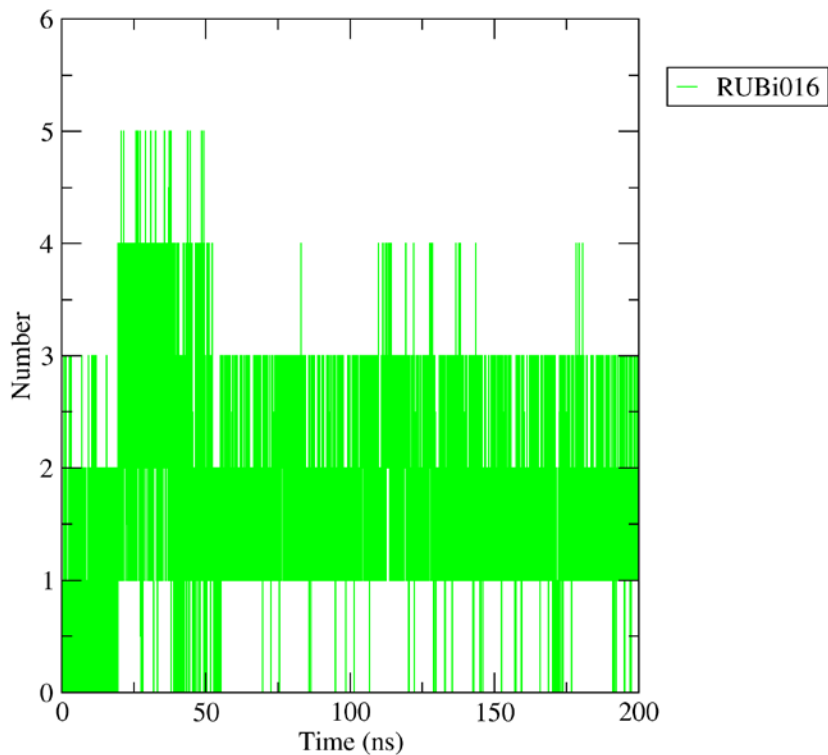

**Figure 9P:** The time evolution of the number of intermolecular hydrogen bonds formed between the RUBi016 and *TbPTR1* protein in the *TbPTR1*-RUBi016 complex

## RUBi017 Hydrogen Bonds

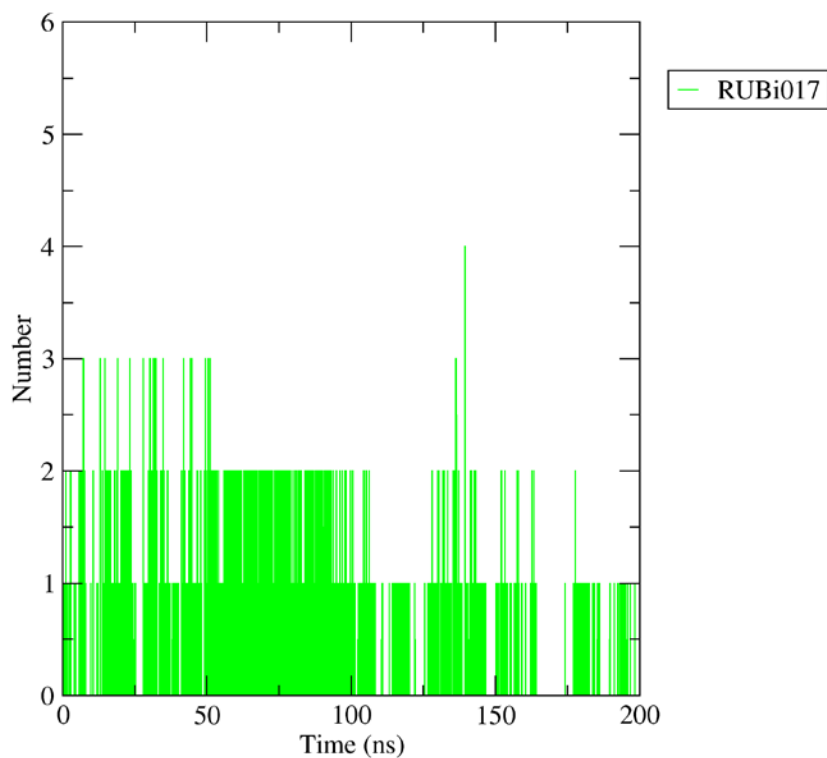

**Figure 9R:** The time evolution of the number of intermolecular hydrogen bonds formed between the RUBi017 and *TbPTR1* protein in the *TbPTR1*-RUBi017 complex

## RUBi018 Hydrogen Bonds

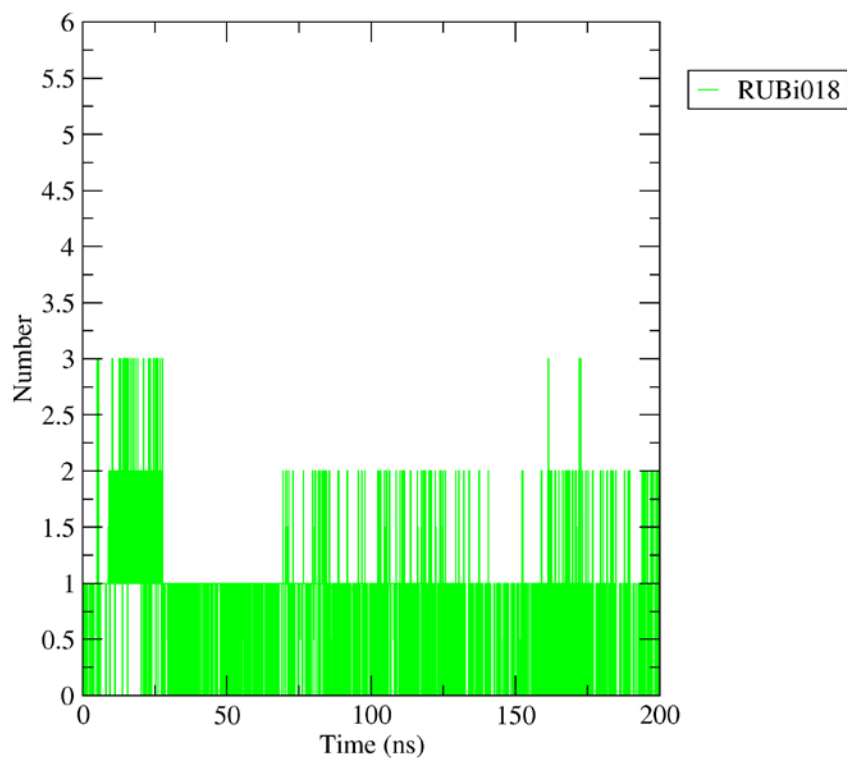

**Figure 9S:** The time evolution of the number of intermolecular hydrogen bonds formed between the RUBi018 and *TbPTR1* protein in the *TbPTR1*-RUBi018 complex

**Supplementary Figure S10:** The Root Mean Square Fluctuation (RMSF) of all the protein in the protein-ligand complexes.

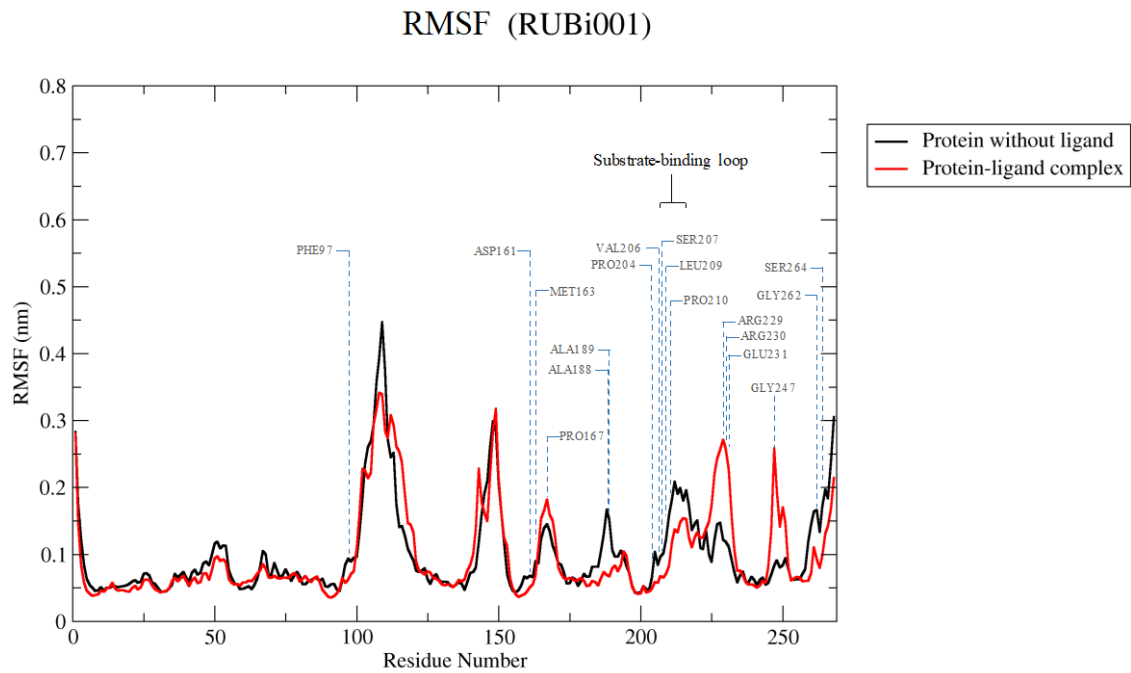

**Figure 10A:** The RMSF of backbone protein in the protein-ligand complex shown as a function of time. The apo protein was colored black and the *Tb*PTR1-RUBi001 complex red.

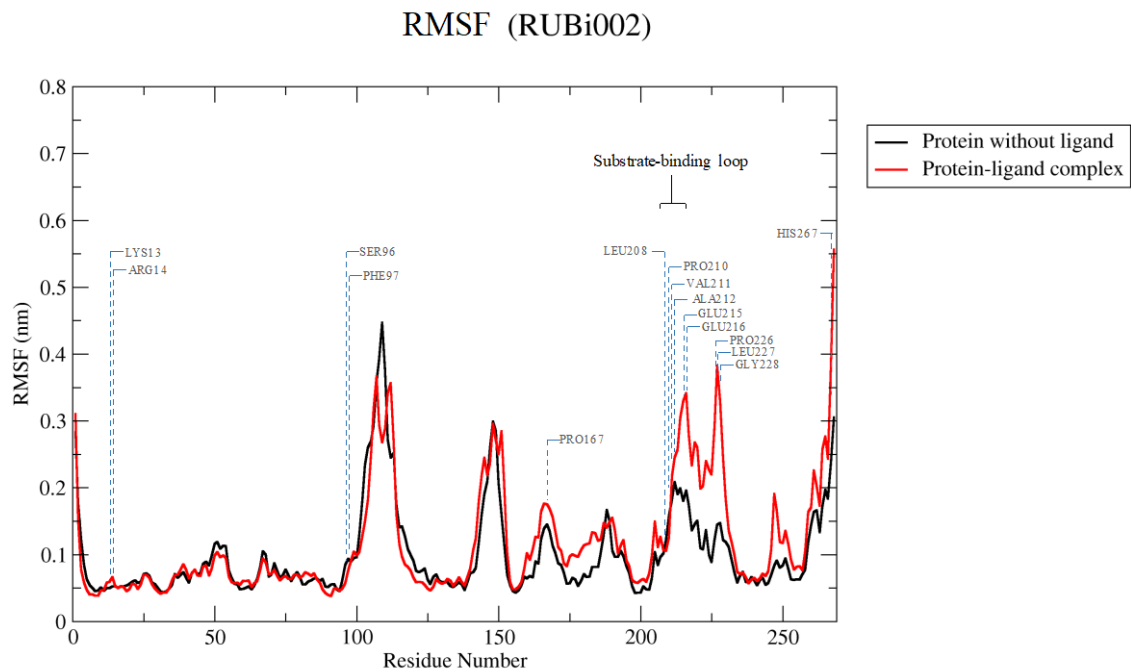

**Figure 10B:** The RMSF of backbone protein in the protein-ligand complex shown as a function of time. The apo protein was colored black and the *Tb*PTR1-RUBi002 complex red.

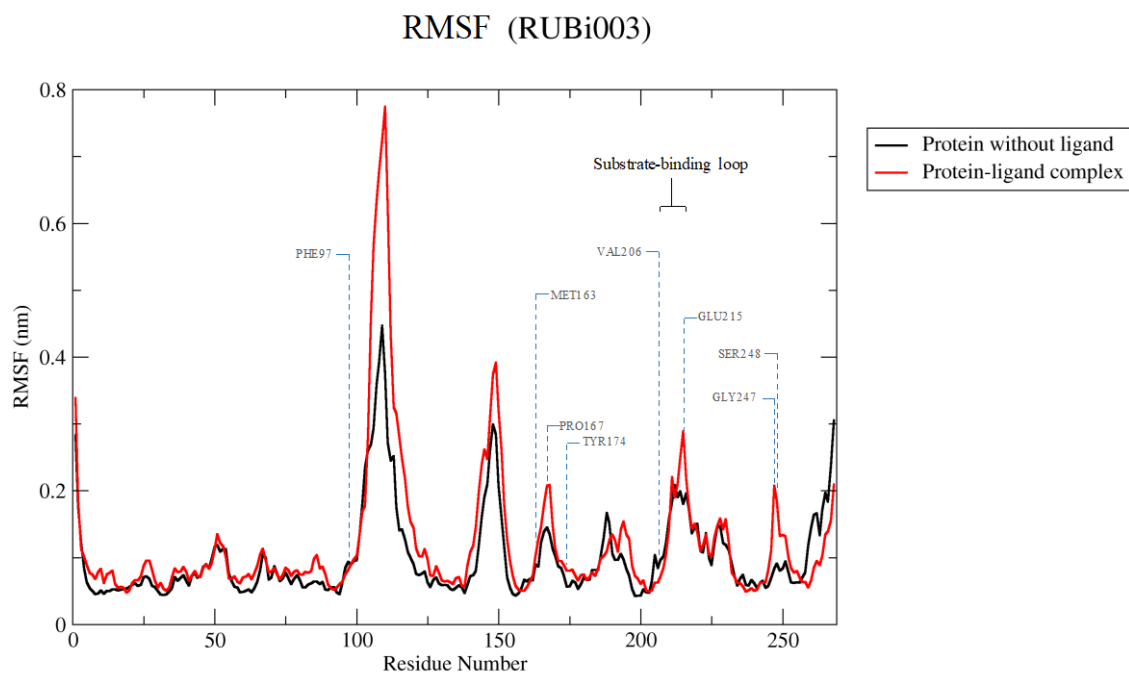

**Figure 10C:** The RMSF of backbone protein in the protein-ligand complex shown as a function of time. The apo protein was colored black and the *Tb*PTR1-RUBi003 complex red.

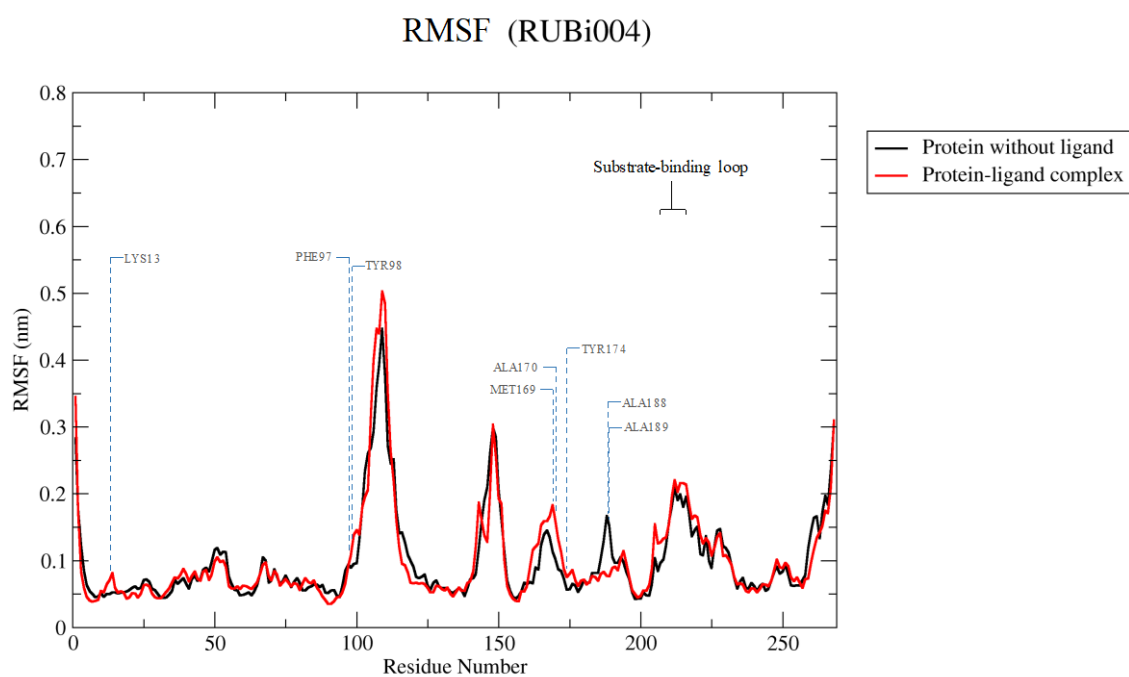

**Figure 10D:** The RMSF of backbone protein in the protein-ligand complex shown as a function of time. The apo protein was colored black and the *Tb*PTR1-RUBi004 complex red.

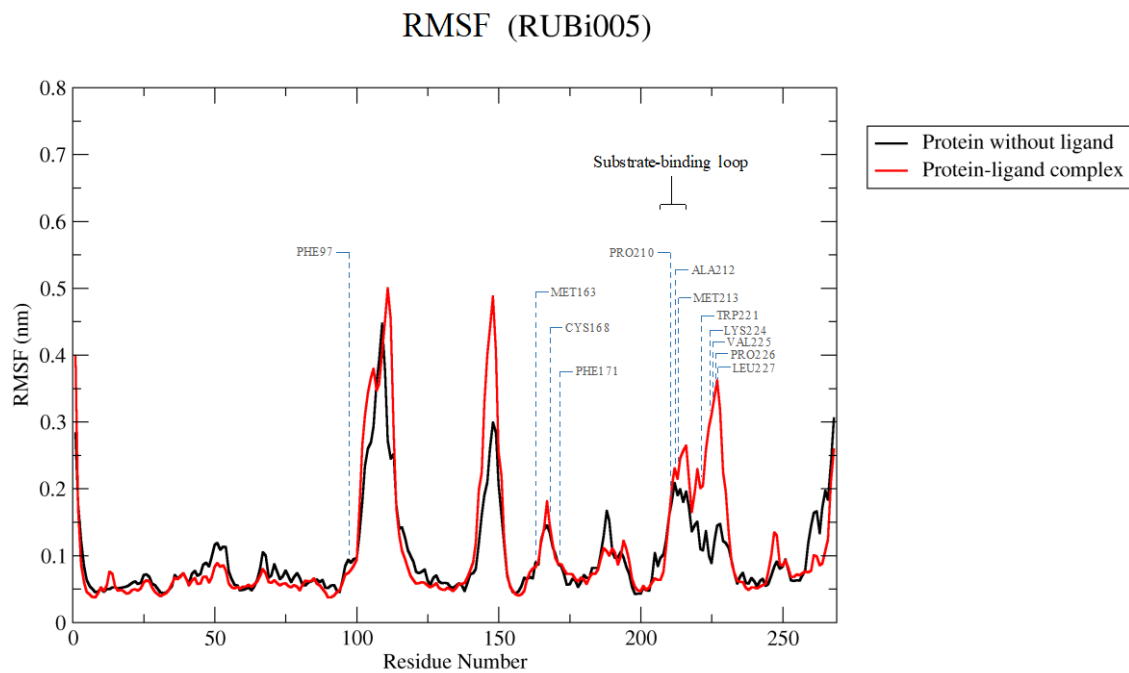

**Figure 10E:** The RMSF of backbone protein in the protein-ligand complex shown as a function of time. The apo protein was colored black and the *Tb*PTR1-RUBi005 complex red.

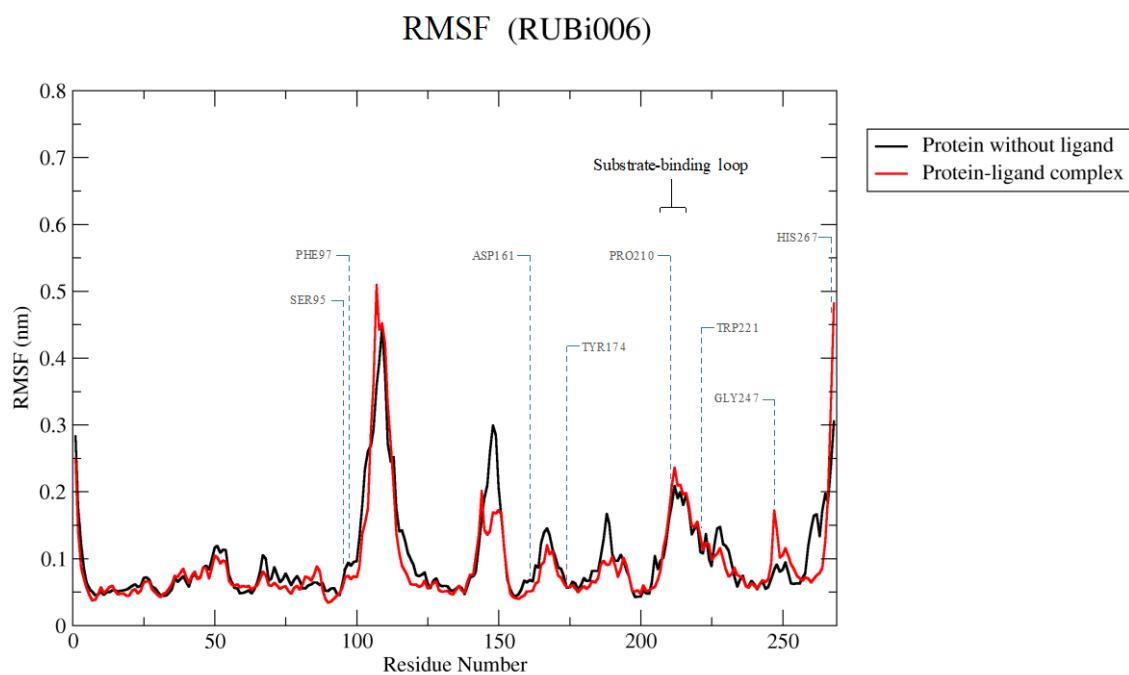

**Figure 10F:** The RMSF of backbone protein in the protein-ligand complex shown as a function of time. The apo protein was colored black and the *Tb*PTR1-RUBi006 complex red.



### RMSF (RUBi007)

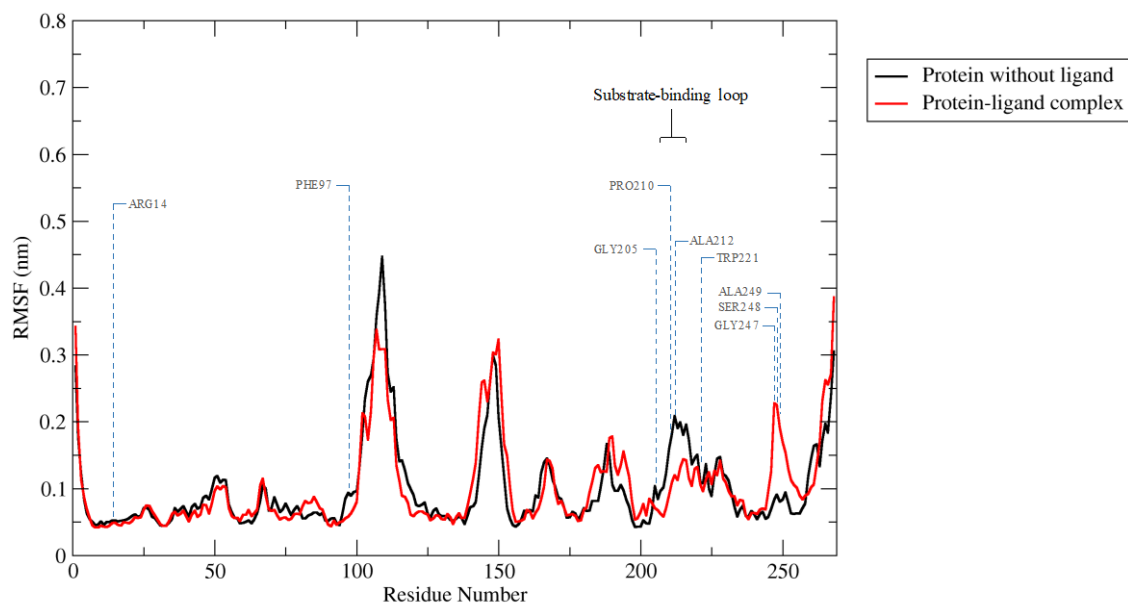

**Figure 10G:** The RMSF of backbone protein in the protein-ligand complex shown as a function of time. The apo protein was colored black and the *Tb*PTR1-RUBi007 complex red.

### RMSF (RUBi008)

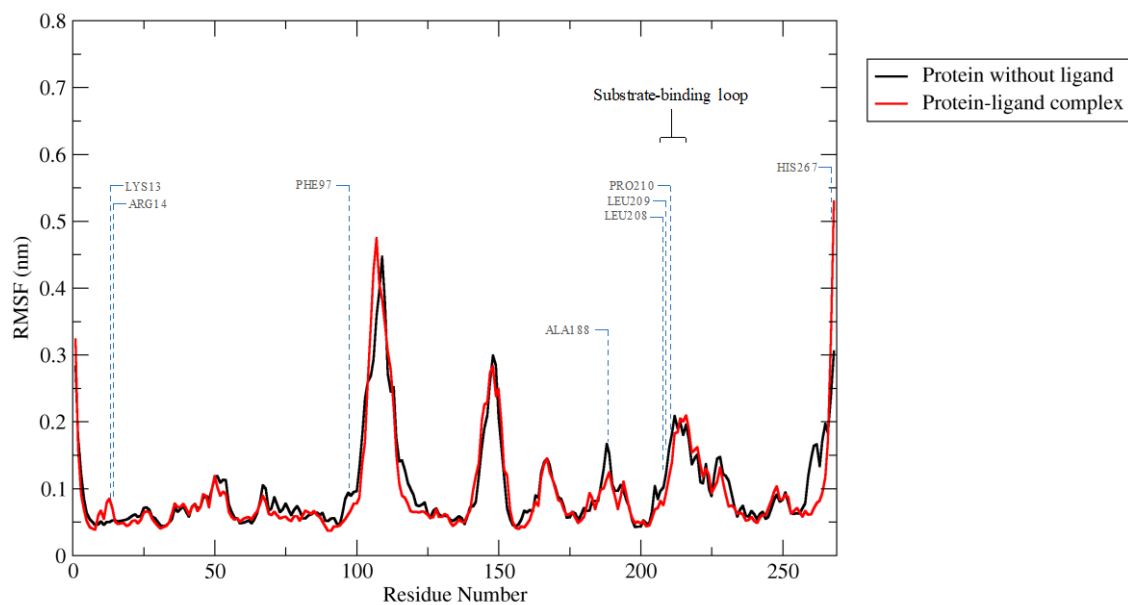

**Figure 10H:** The RMSF of backbone protein in the protein-ligand complex shown as a function of time. The apo protein was colored black and the *Tb*PTR1-RUBi008 complex red.

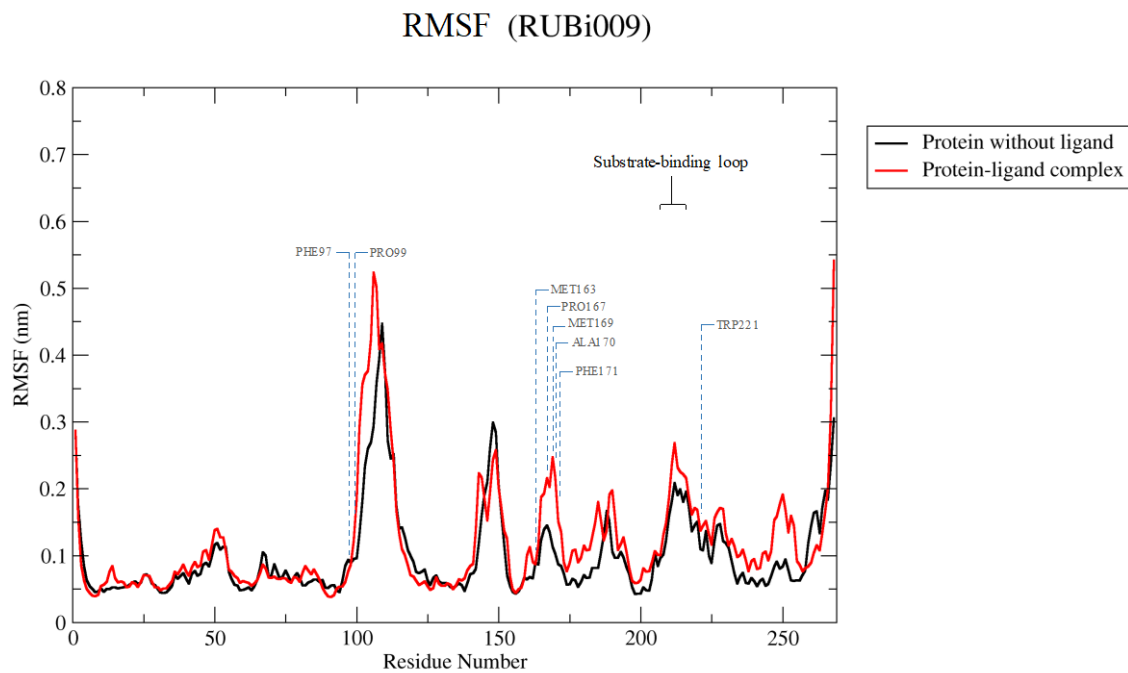

**Figure 10I:** The RMSF of backbone protein in the protein-ligand complex shown as a function of time. The apo protein was colored black and the *TbPTR1*-RUBi009 complex red.

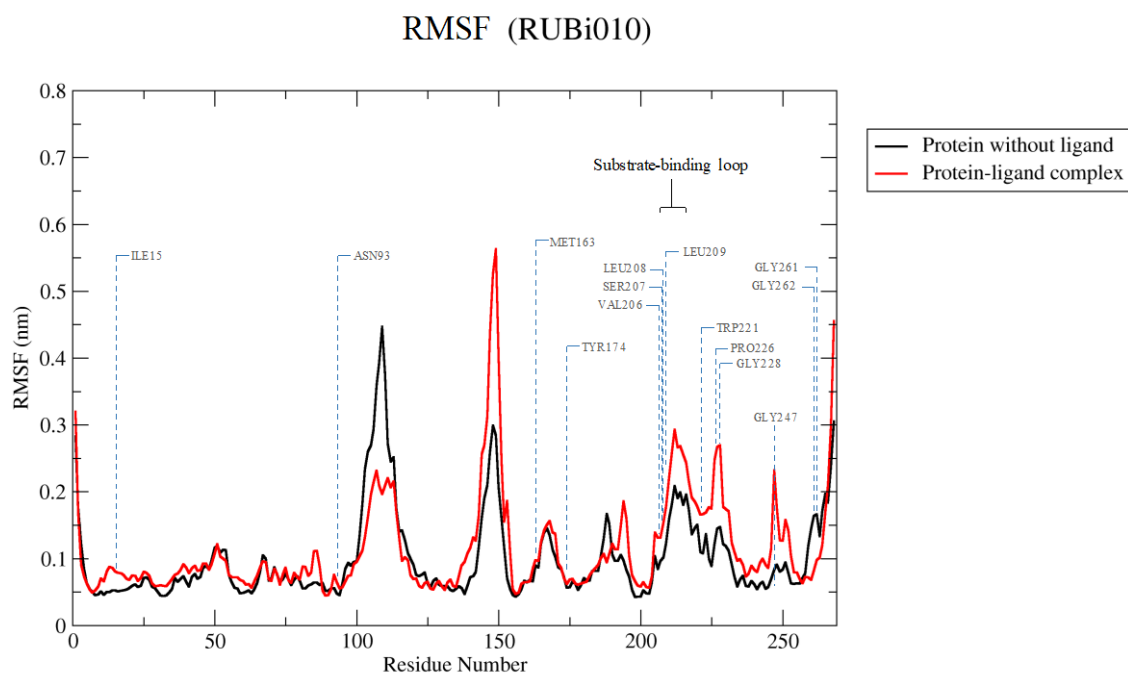

**Figure 10J:** The RMSF of backbone protein in the protein-ligand complex shown as a function of time. The apo protein was colored black and the *TbPTR1*-RUBi010 complex red.

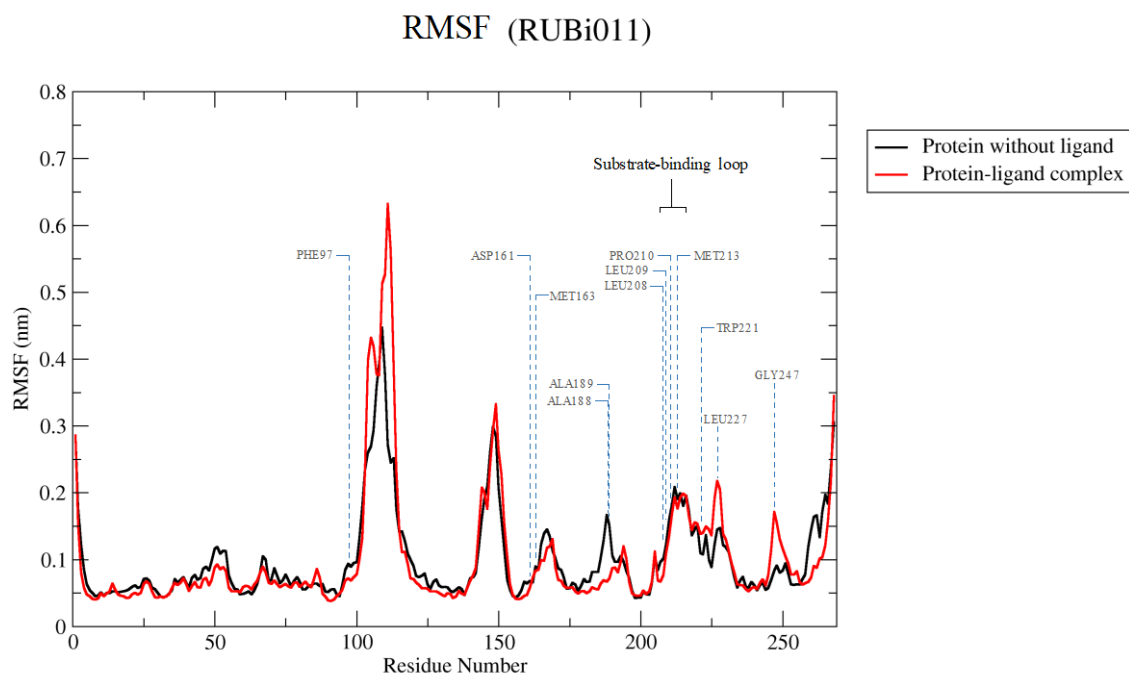

**Figure 10K:** The RMSF of backbone protein in the protein-ligand complex shown as a function of time. The apo protein was colored black and the *Tb*PTR1-RUBi011 complex red.

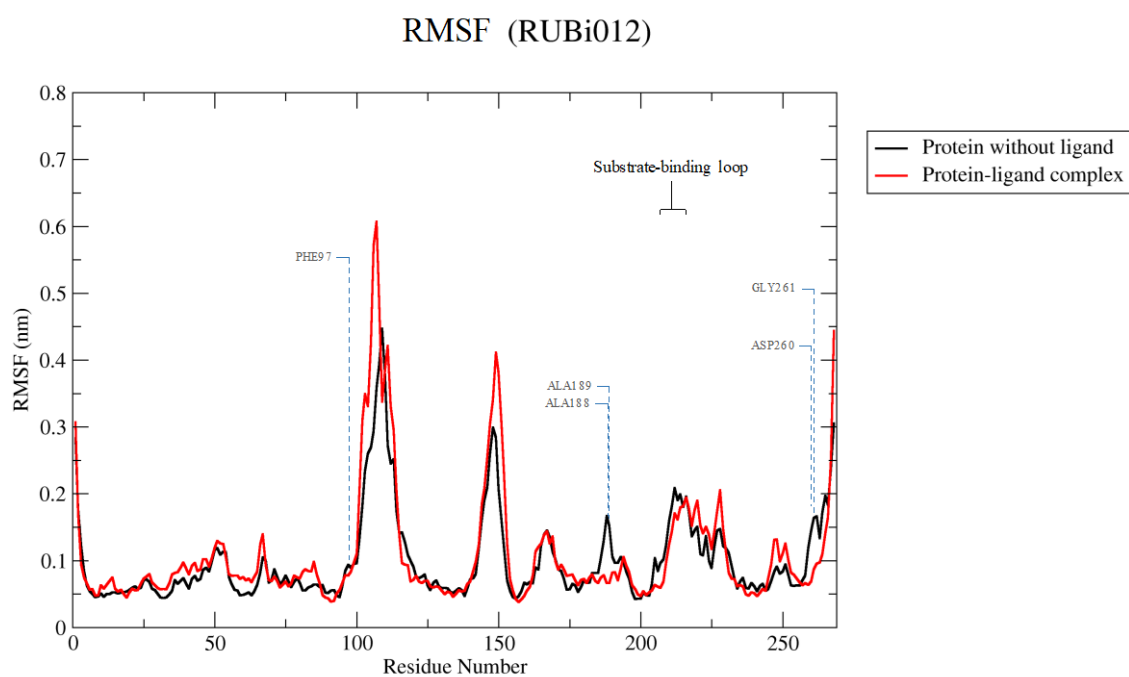

**Figure 10L:** The RMSF of backbone protein in the protein-ligand complex shown as a function of time. The apo protein was colored black and the *Tb*PTR1-RUBi012 complex red.

### RMSF (RUBi013)

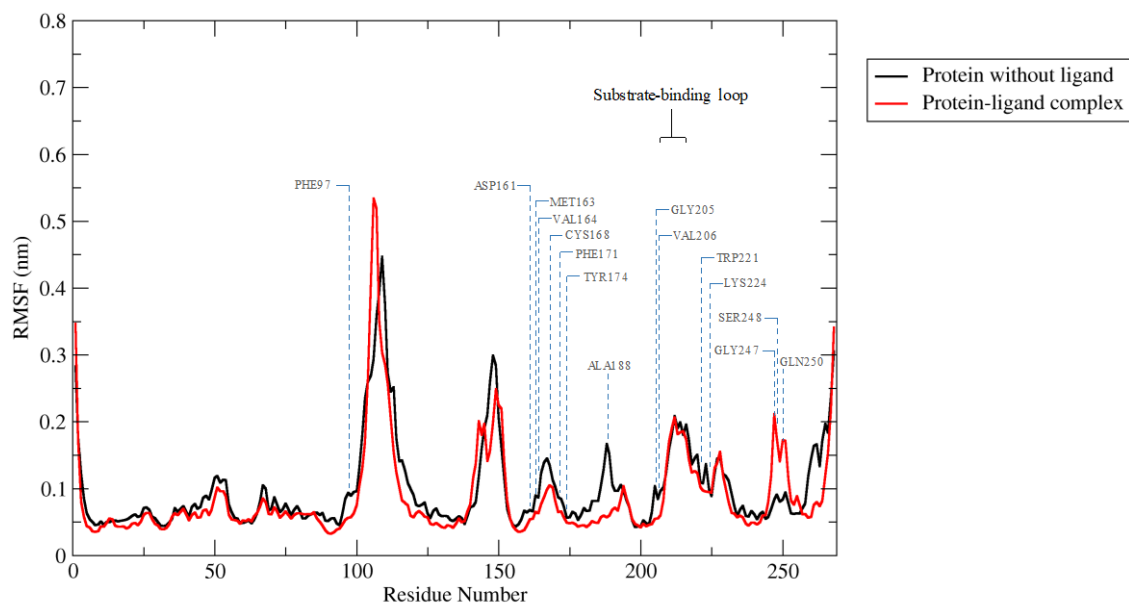

**Figure 10M:** The RMSF of backbone protein in the protein-ligand complex shown as a function of time. The apo protein was colored black and the *TbPTR1*-RUBi013 complex red.

### RMSF (RUBi014)

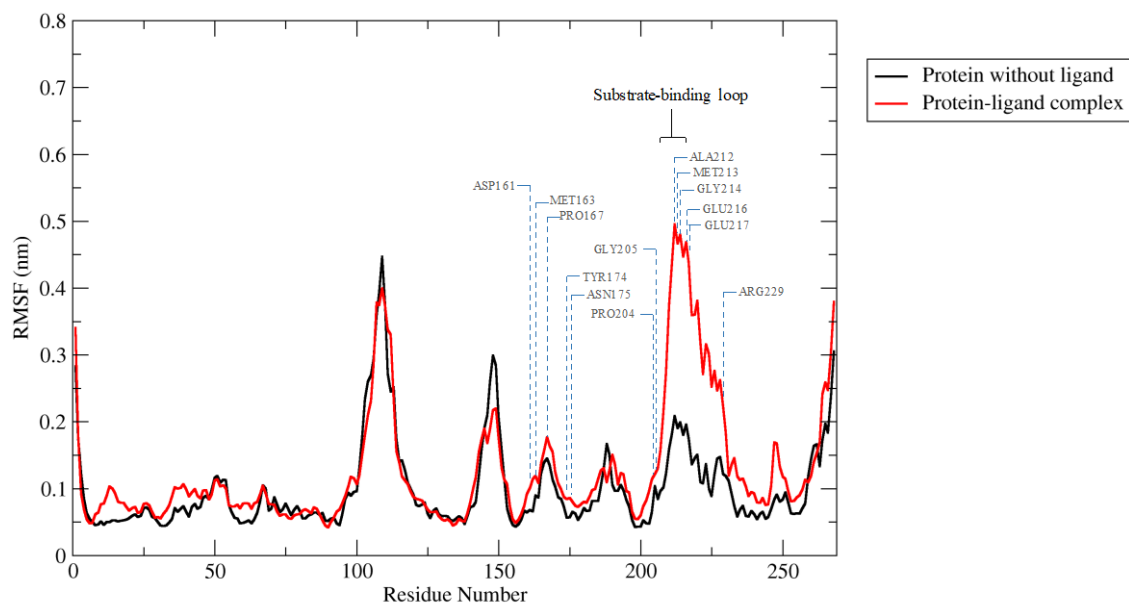

**Figure 10N:** The RMSF of backbone protein in the protein-ligand complex shown as a function of time. The apo protein was colored black and the *TbPTR1*-RUBi014 complex red.

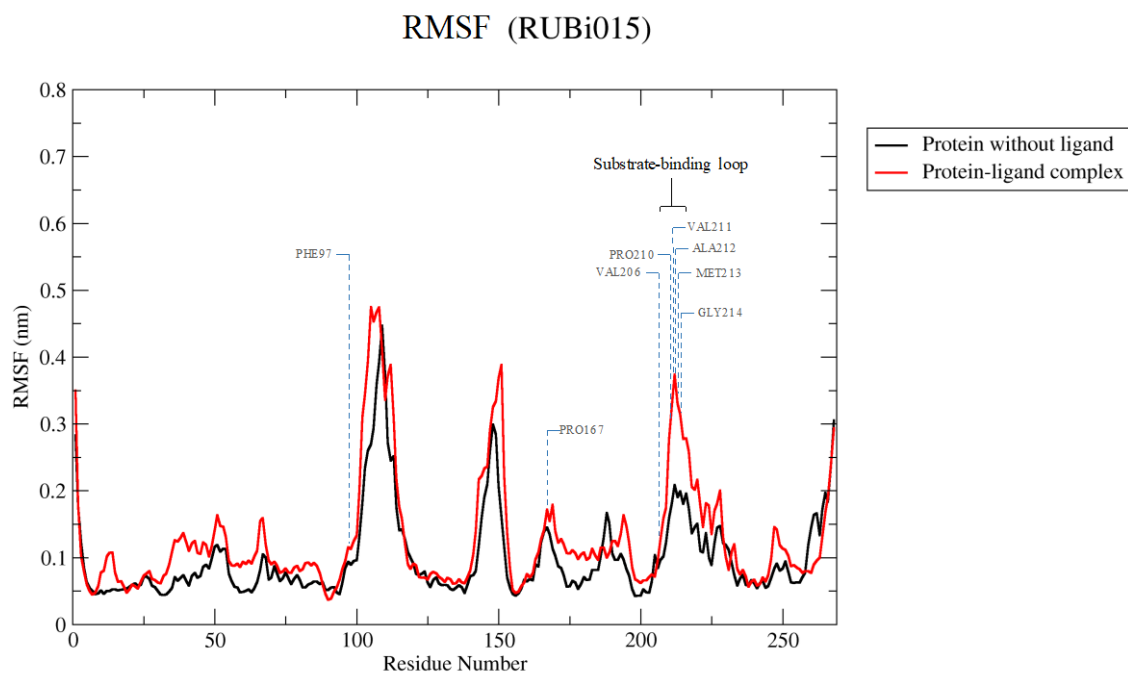

**Figure 10O:** The RMSF of backbone protein in the protein-ligand complex shown as a function of time. The apo protein was colored black and the *TbPTR1*-RUBi015 complex red.

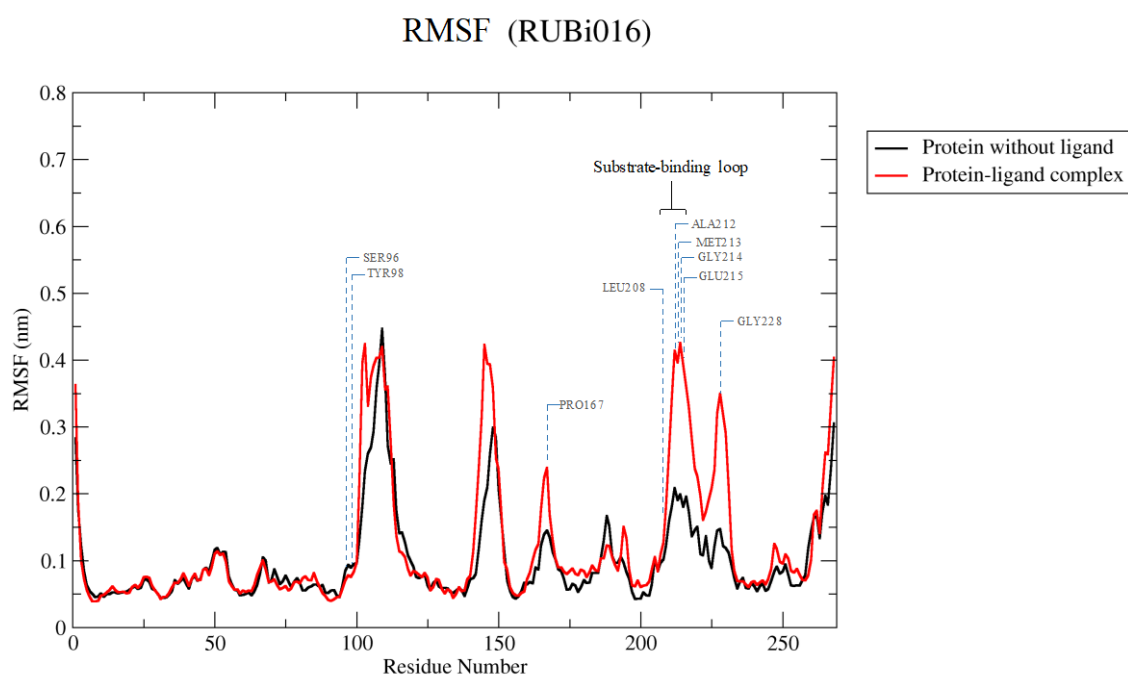

**Figure 10P:** The RMSF of backbone protein in the protein-ligand complex shown as a function of time. The apo protein was colored black and the *TbPTR1*-RUBi016 complex red.

### RMSF (RUBi017)

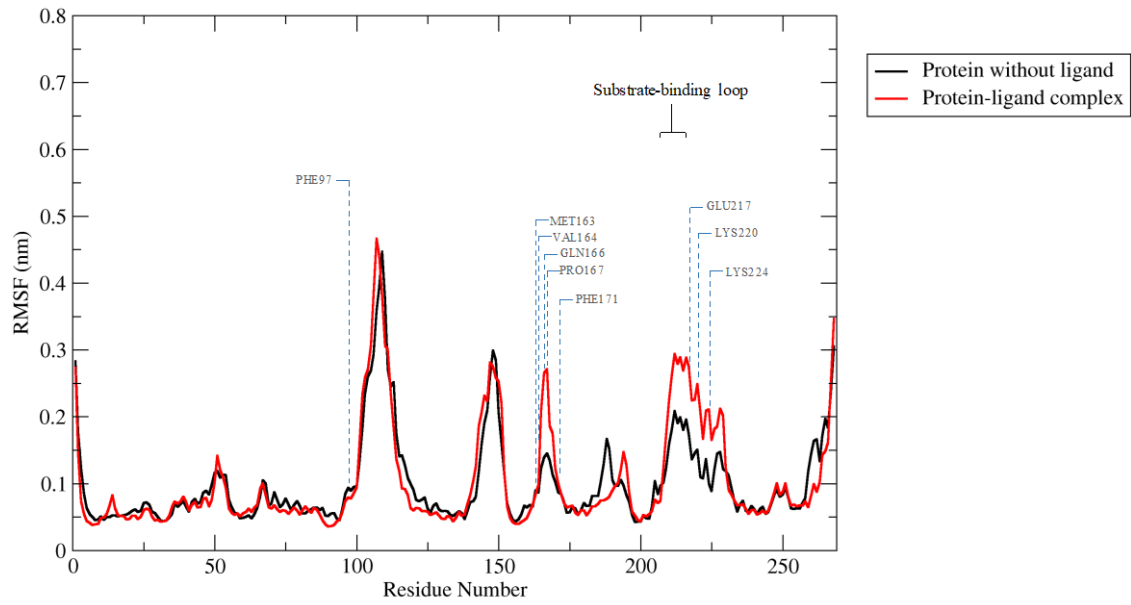

**Figure 10R:** The RMSF of backbone protein in the protein-ligand complex shown as a function of time. The apo protein was colored black and the *TbPTR1*-RUBi017 complex red.

### RMSF (RUBi018)

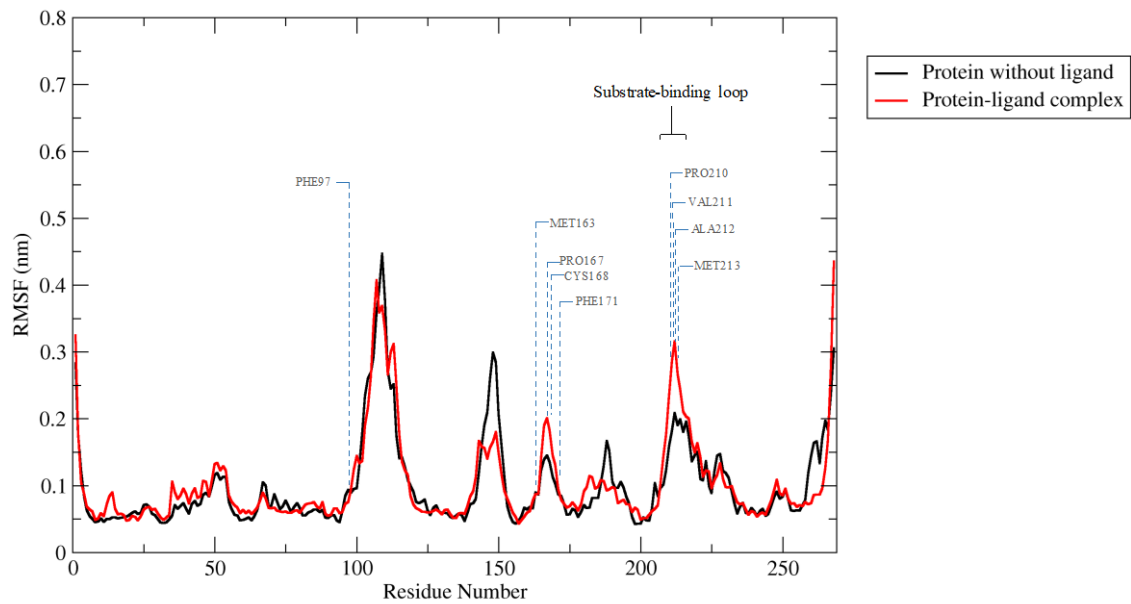

**Figure 10S:** The RMSF of backbone protein in the protein-ligand complex shown as a function of time. The apo protein was colored black and the *TbPTR1*-RUBi018 complex red.

**Supplementary Figure S11:** Energetic contribution of the of *Tb*PTR1 residues in binding of the protein-ligand complexes.

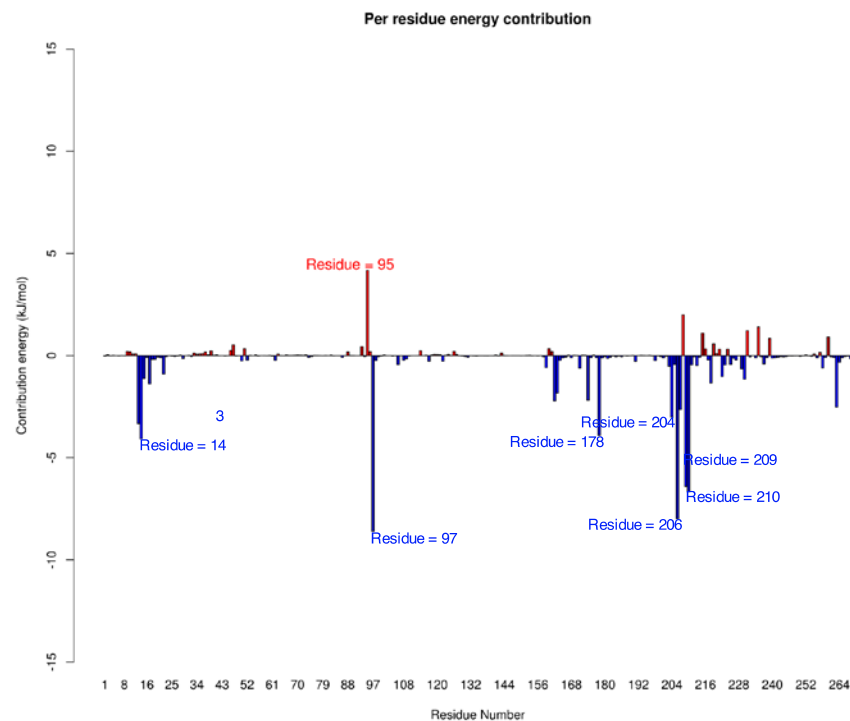

**Figure 11A:** Energetic contribution of the of *Tb*PTR1 residues in binding. The energies of the *Tb*PTR1-RUBi001 complex are given as kilojoules per mole. A)  $\Delta\_E\_MM$ ,  $\Delta\_G\_polar$ ,  $\Delta\_G\_nonpolar$  and  $\Delta\_G\_binding$  as a function of time B) Binding energy contribution energy for each residue.

A)

B)

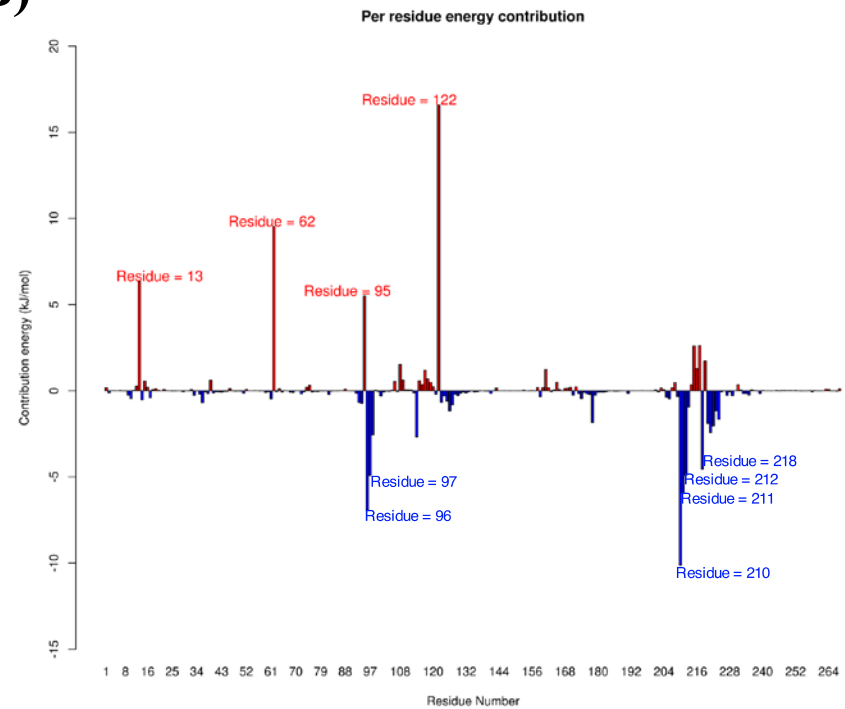

**Figure 11B:** Energetic contribution of the of *TbPTR1* residues in binding. The energies of the *TbPTR1*-RUBi002 complex are given as kilojoules per mole. A)  $\Delta\_E\_MM$ ,  $\Delta\_G\_polar$ ,  $\Delta\_G\_nonpolar$  and  $\Delta\_G\_binding$  as a function of time B) Binding energy contribution energy for each residue.



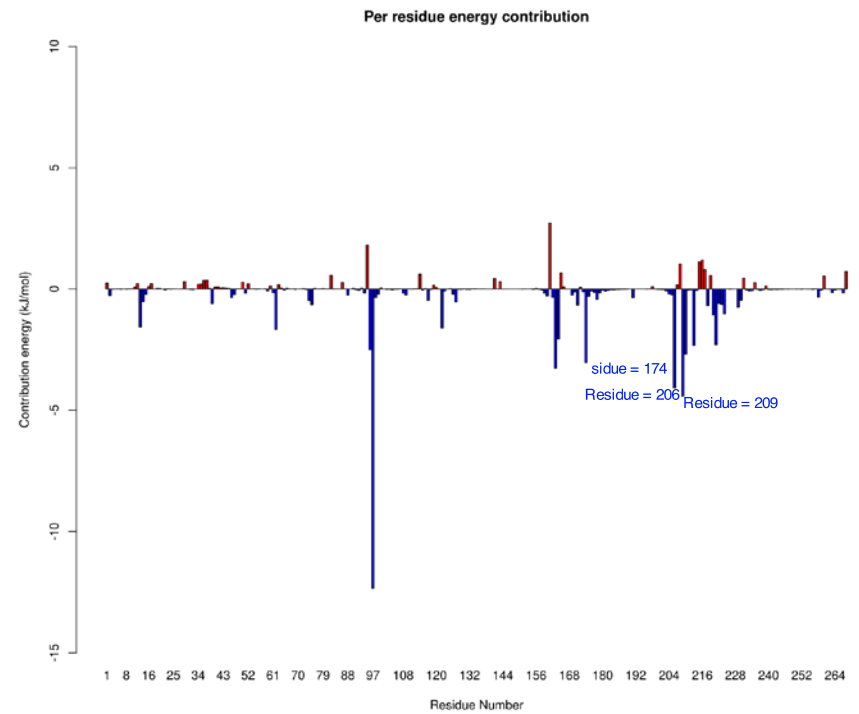

**Figure 11C:** Energetic contribution of the of *TbPTR1* residues in binding. The energies of the *TbPTR1*-RUBi003 complex are given as kilojoules per mole. A)  $\Delta_E_{MM}$ ,  $\Delta_G_{polar}$ ,  $\Delta_G_{nonpolar}$  and  $\Delta_G_{binding}$  as a function of time B) Binding energy contribution energy for each residue.

A)

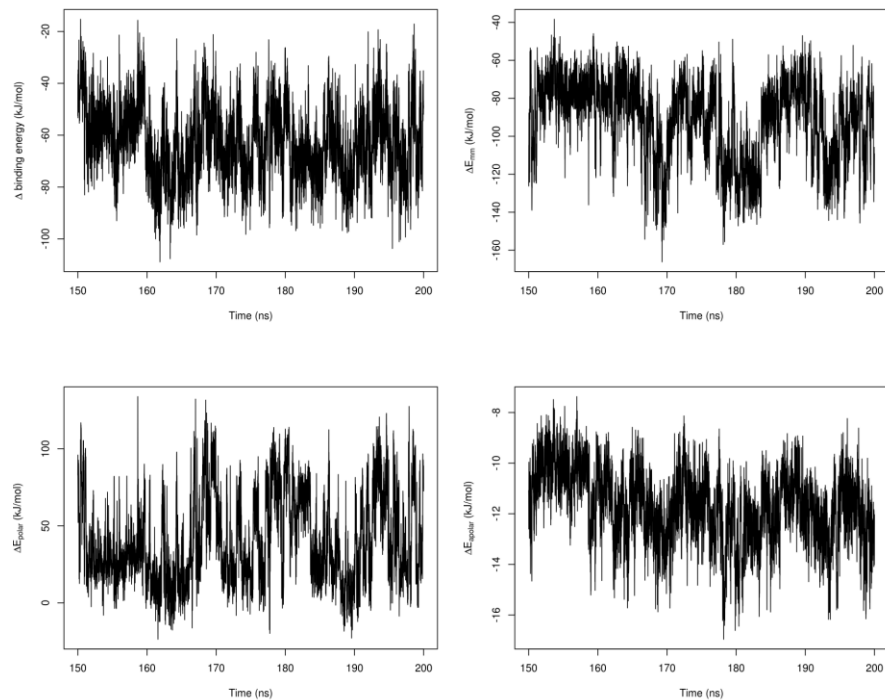

B)

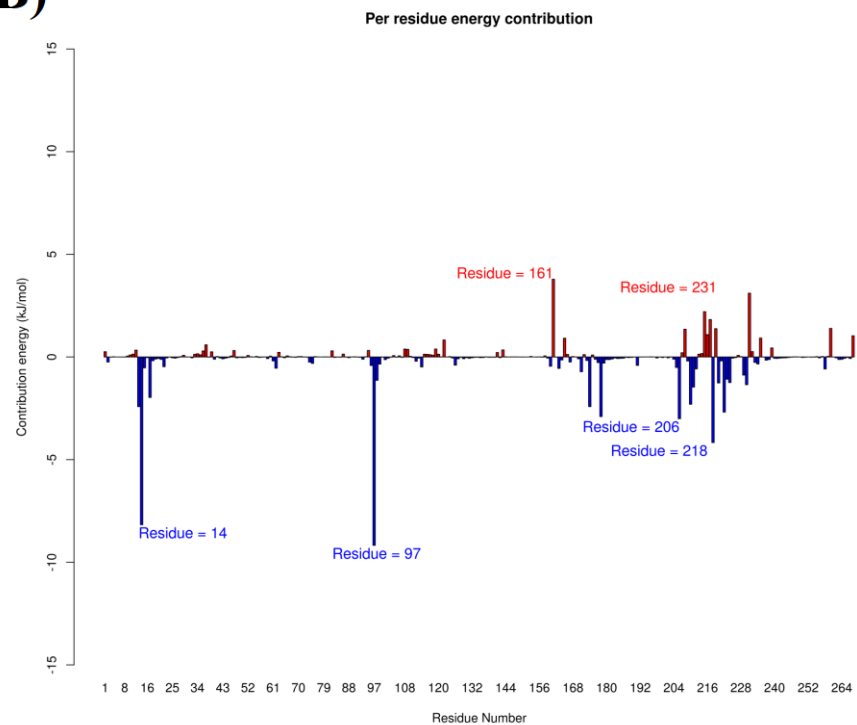

**Figure 11D:** Energetic contribution of the of *TbPTR1* residues in binding. The energies of the *TbPTR1*-RUBi004 complex are given as kilojoules per mole. A)  $\Delta E_{MM}$ ,  $\Delta G_{polar}$ ,  $\Delta G_{nonpolar}$  and  $\Delta G_{binding}$  as a function of time B) Binding energy contribution energy for each residue.

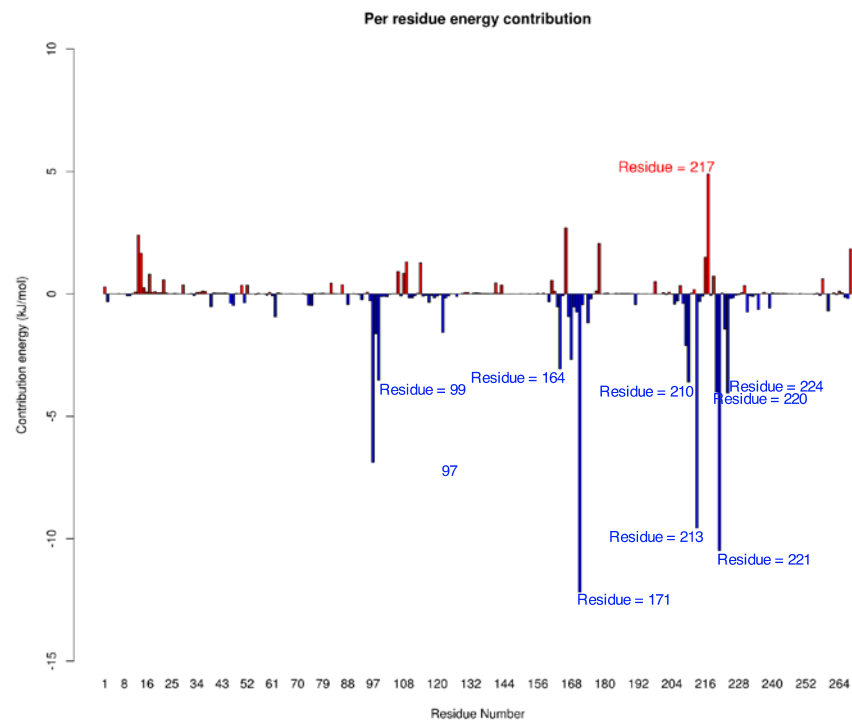

**Figure 11E:** Energetic contribution of the of *TbPTR1* residues in binding. The energies of the *TbPTR1*-RUBi005 complex are given as kilojoules per mole. A)  $\Delta\_E\_MM$ ,  $\Delta\_G\_polar$ ,  $\Delta\_G\_nonpolar$  and  $\Delta\_G\_binding$  as a function of time B) Binding energy contribution energy for each residue.

A)

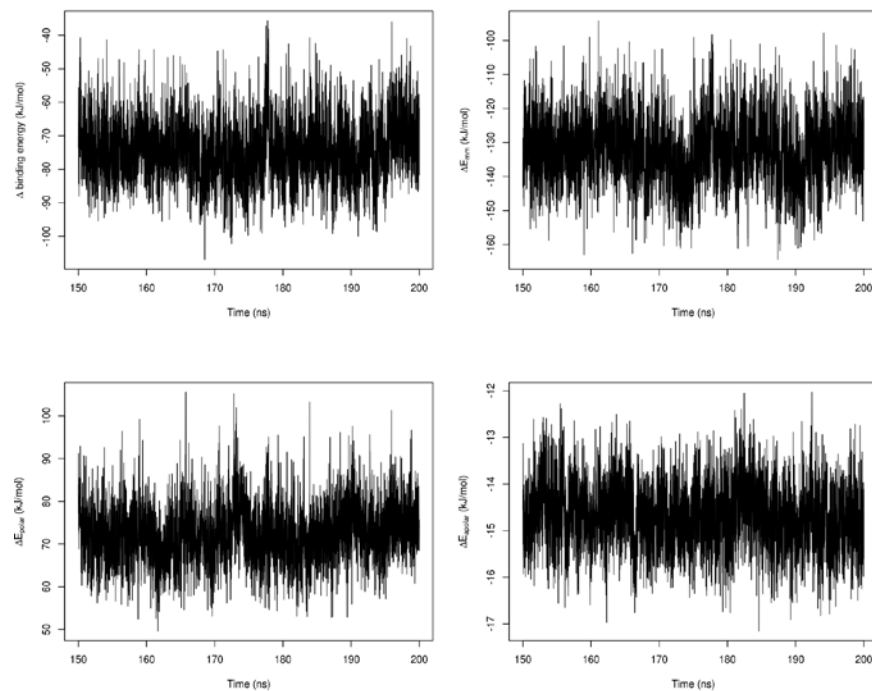

B)

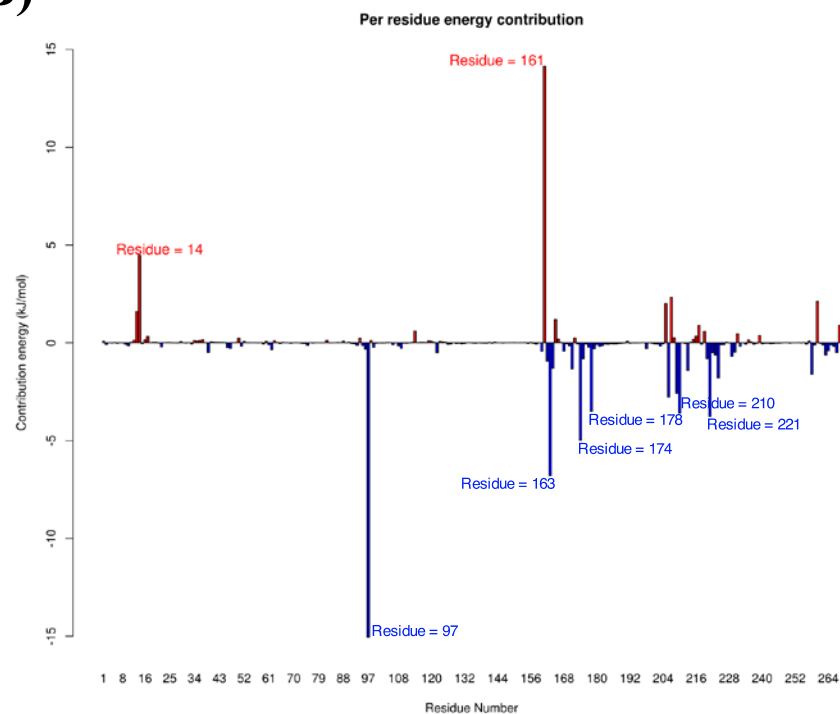

**Figure 11F:** Energetic contribution of the of *TbPTR1* residues in binding. The energies of the *TbPTR1*-RUBi006 complex are given as kilojoules per mole. A)  $\Delta E_{\text{MM}}$ ,  $\Delta G_{\text{polar}}$ ,  $\Delta G_{\text{nonpolar}}$  and  $\Delta G_{\text{binding}}$  as a function of time B) Binding energy contribution energy for each residue.

A)

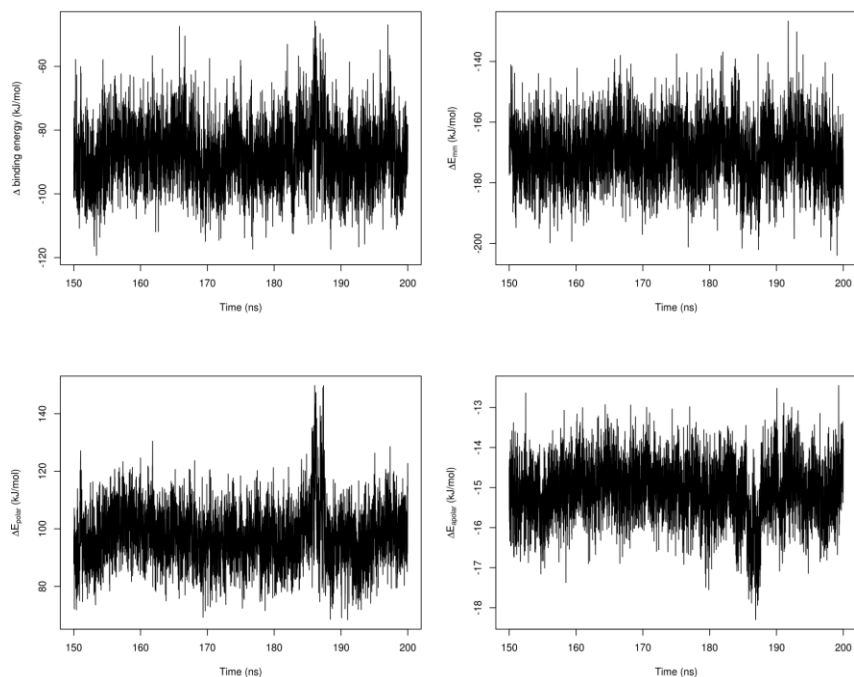

B)

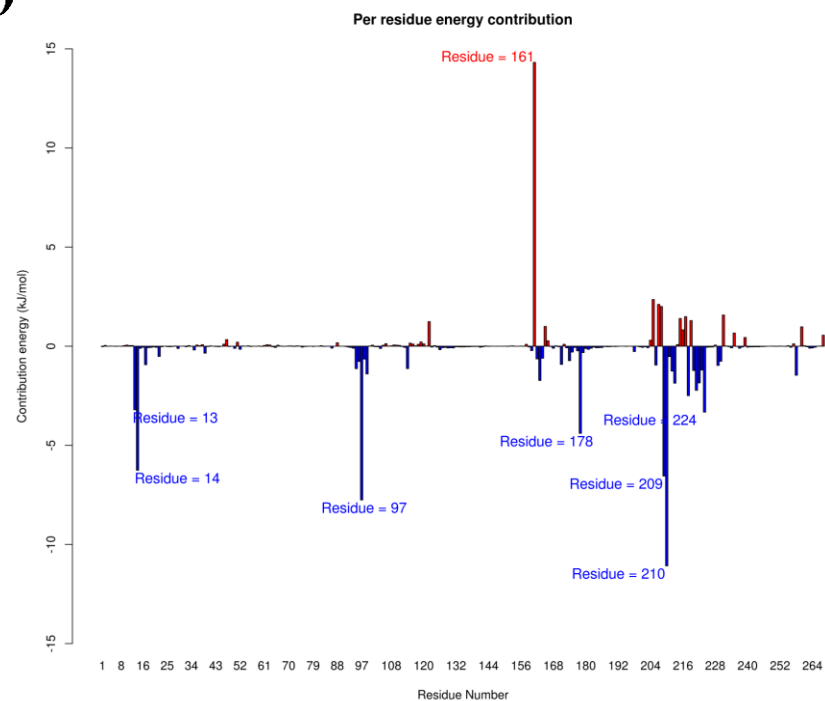

**Figure 11G:** Energetic contribution of the of *TbPTR1* residues in binding. The energies of the *TbPTR1*-RUBi007 complex are given as kilojoules per mole. A)  $\Delta E_{MM}$ ,  $\Delta E_{polar}$ ,  $\Delta E_{nonpolar}$  and  $\Delta E_{binding}$  as a function of time B) Binding energy contribution energy for each residue.

**A)**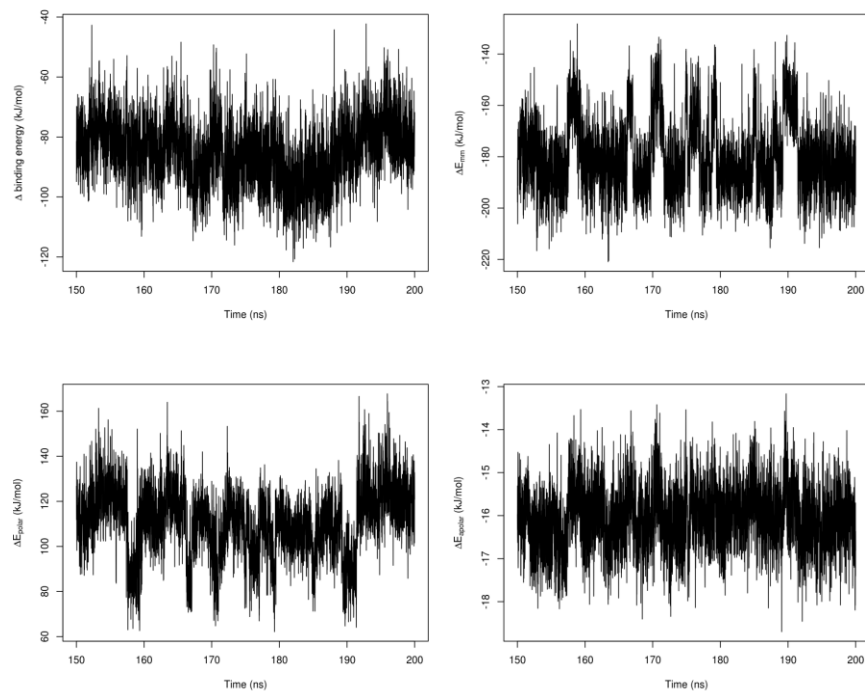**B)**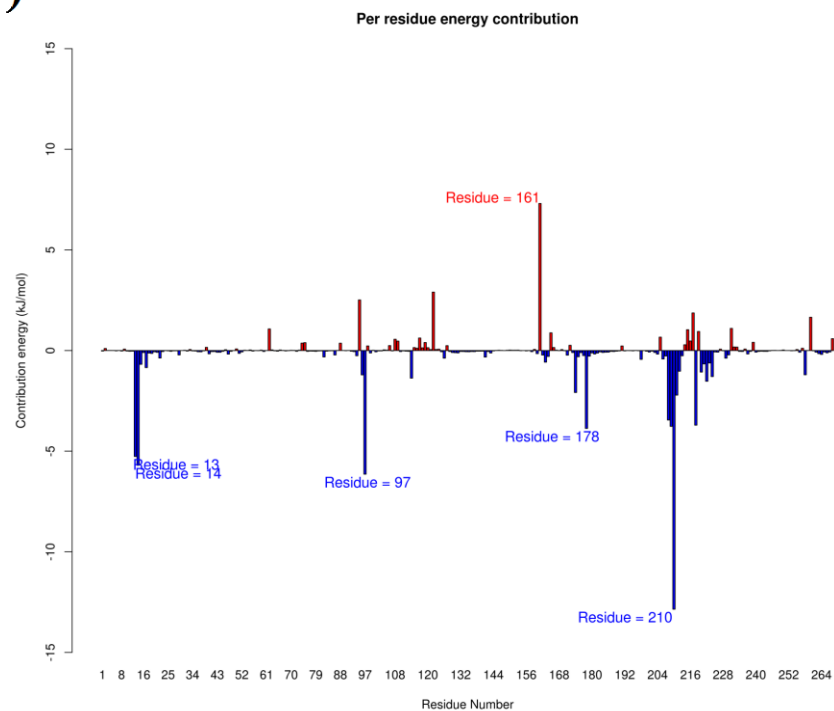

**Figure 11H:** Energetic contribution of the of *TbPTR1* residues in binding. The energies of the *TbPTR1*-RUBi008 complex are given as kilojoules per mole. A)  $\Delta E_{\text{MM}}$ ,  $\Delta G_{\text{polar}}$ ,  $\Delta G_{\text{nonpolar}}$  and  $\Delta G_{\text{binding}}$  as a function of time B) Binding energy contribution energy for each residue.

A)

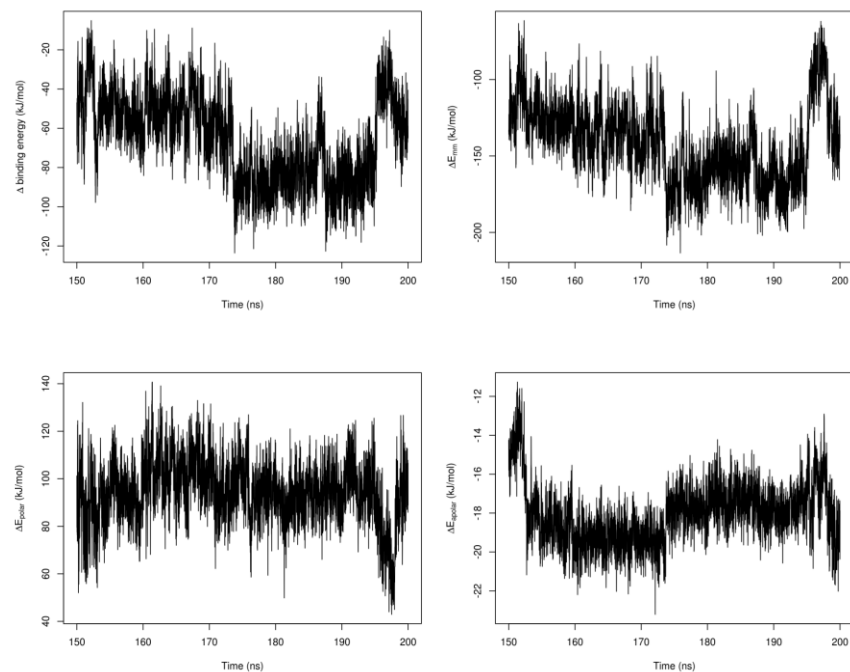

B)

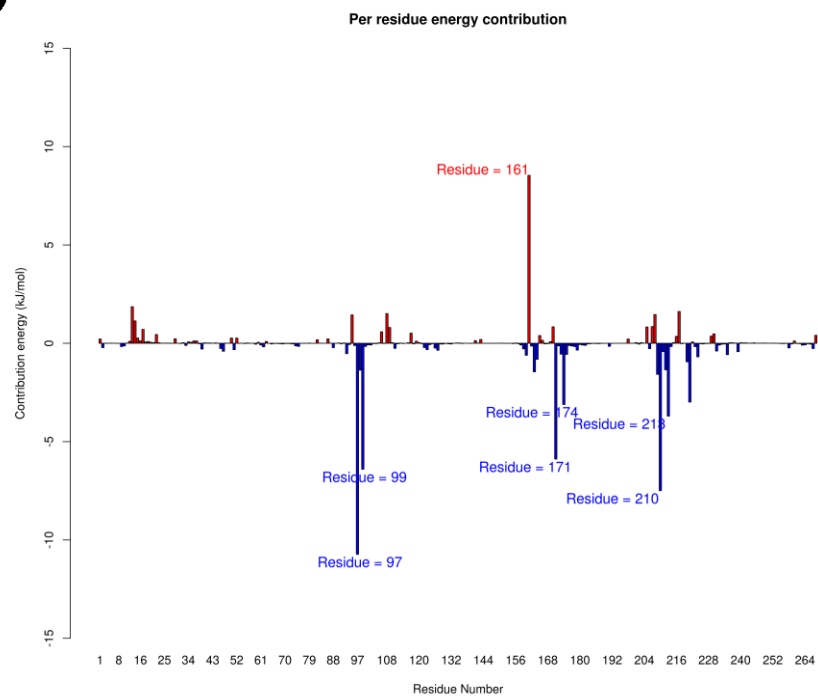

**Figure 11I:** Energetic contribution of the of *TbPTR1* residues in binding. The energies of the *TbPTR1*-RUBi009 complex are given as kilojoules per mole. A)  $\Delta E_{\text{MM}}$ ,  $\Delta E_{\text{polar}}$ ,  $\Delta E_{\text{nonpolar}}$  and  $\Delta E_{\text{binding}}$  as a function of time B) Binding energy contribution energy for each residue.

**A)**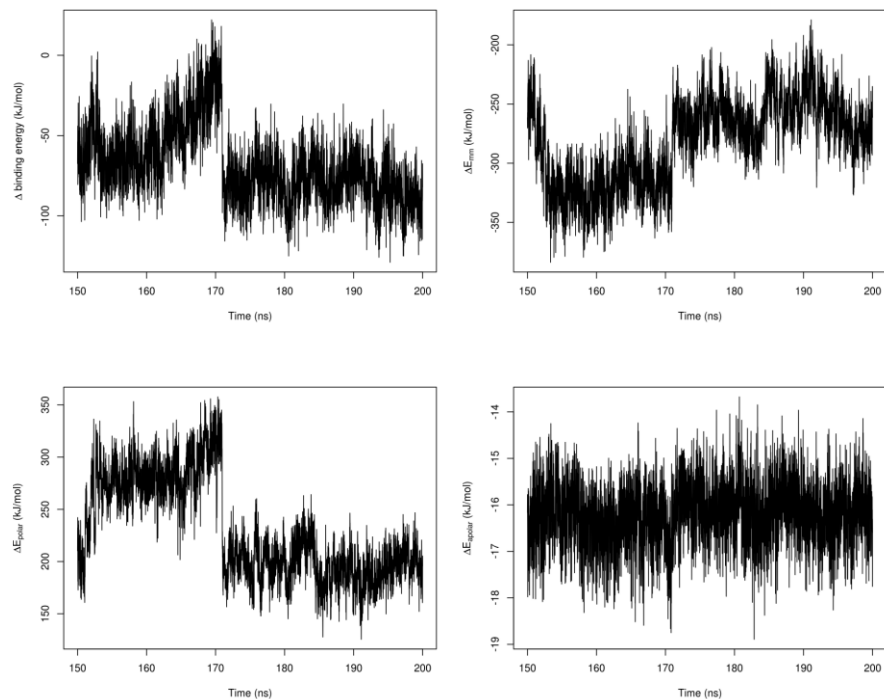**B)**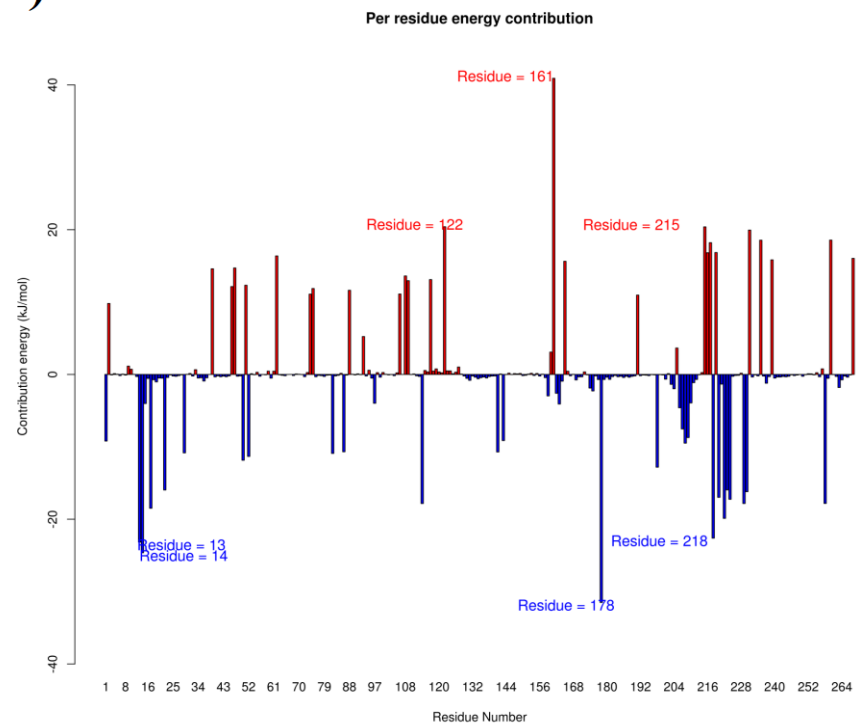

**Figure 11J:** Energetic contribution of the of *Tb*PTR1 residues in binding. The energies of the *Tb*PTR1-RUBi010 complex are given as kilojoules per mole. A)  $\Delta_{\text{E\_MM}}$ ,  $\Delta_{\text{G\_polar}}$ ,  $\Delta_{\text{G\_nonpolar}}$  and  $\Delta_{\text{G\_binding}}$  as a function of time B) Binding energy contribution energy for each residue.



A)

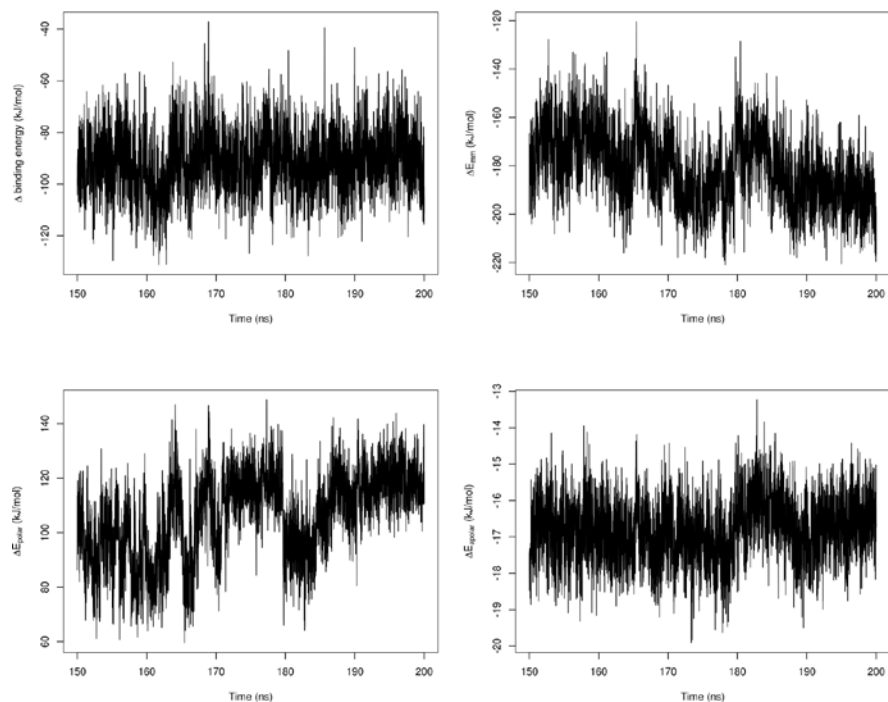

B)

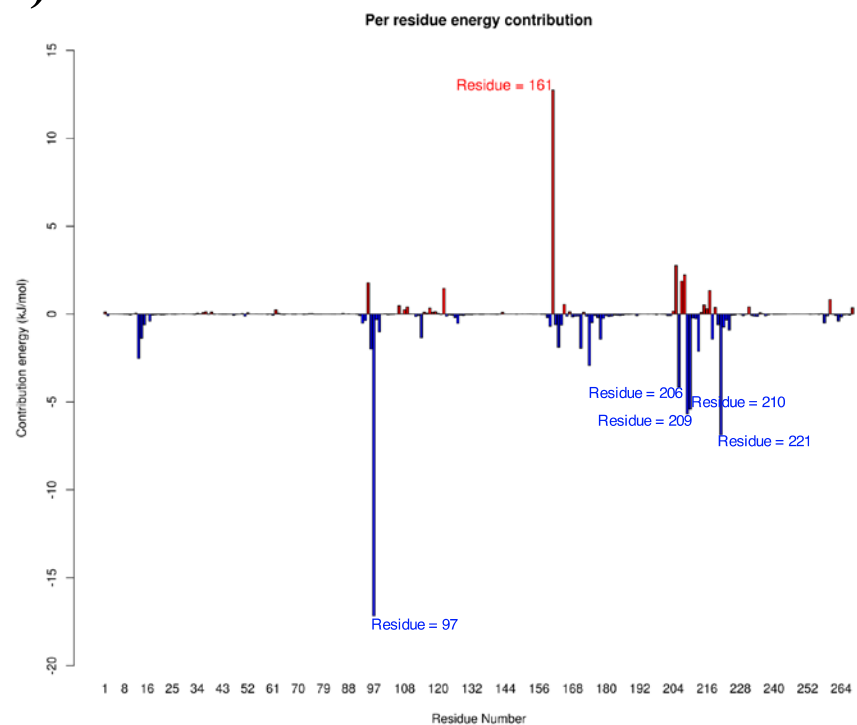

**Figure 11K:** Energetic contribution of the of *TbPTR1* residues in binding. The energies of the *TbPTR1*-RUBi011 complex are given as kilojoules per mole. A)  $\Delta E_{\text{MM}}$ ,  $\Delta G_{\text{polar}}$ ,  $\Delta G_{\text{nonpolar}}$  and  $\Delta G_{\text{binding}}$  as a function of time B) Binding energy contribution energy for each residue.

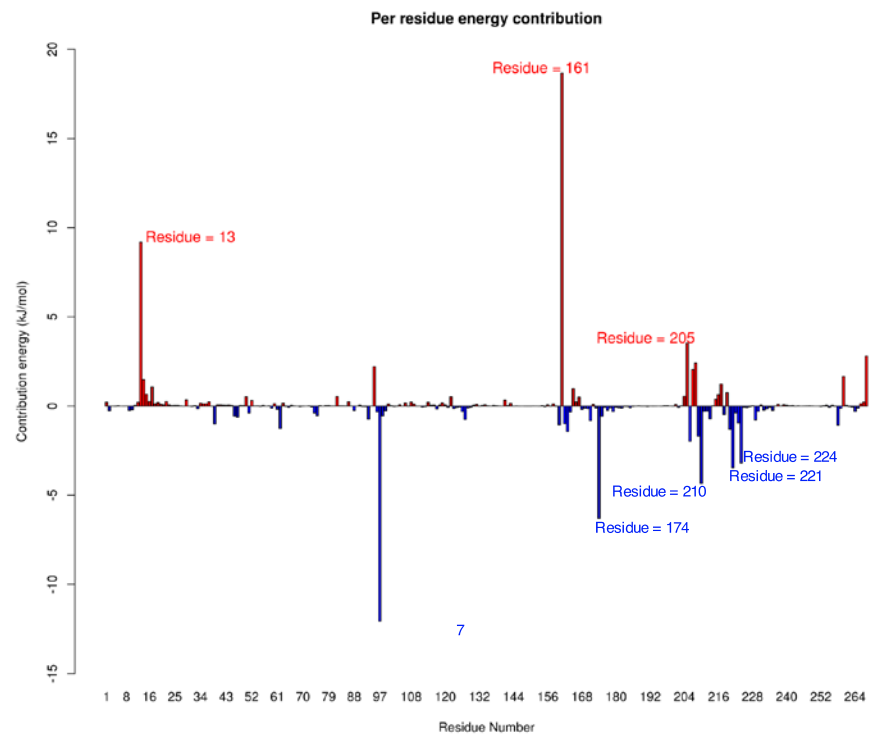

**Figure 11L:** Energetic contribution of the of *Tb*PTR1 residues in binding. The energies of the *Tb*PTR1-RUBi012 complex are given as kilojoules per mole. A)  $\Delta\_E\_MM$ ,  $\Delta\_G\_polar$ ,  $\Delta\_G\_nonpolar$  and  $\Delta\_G\_binding$  as a function of time B) Binding energy contribution energy for each residue.

**A)**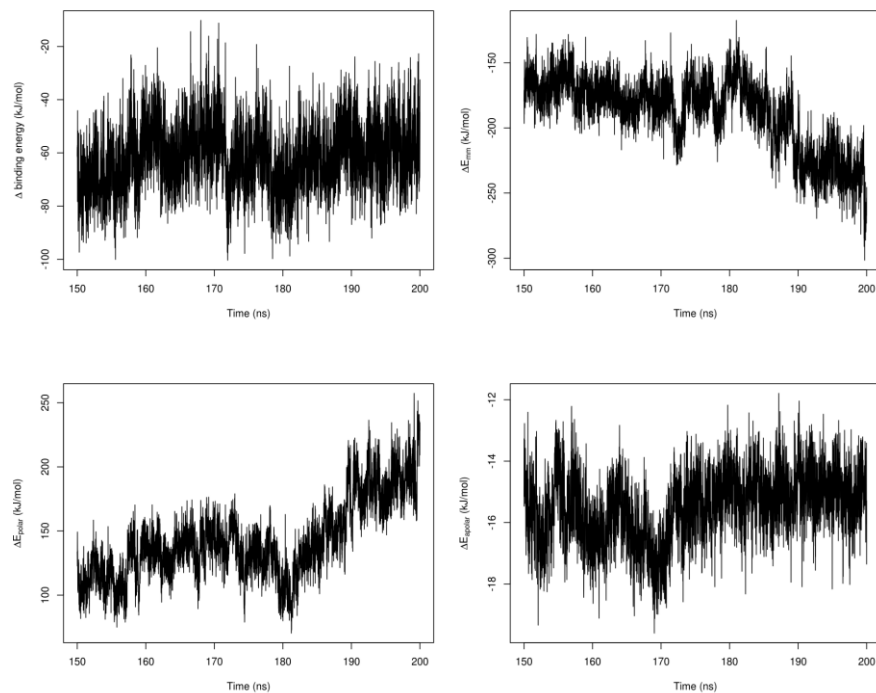**B)**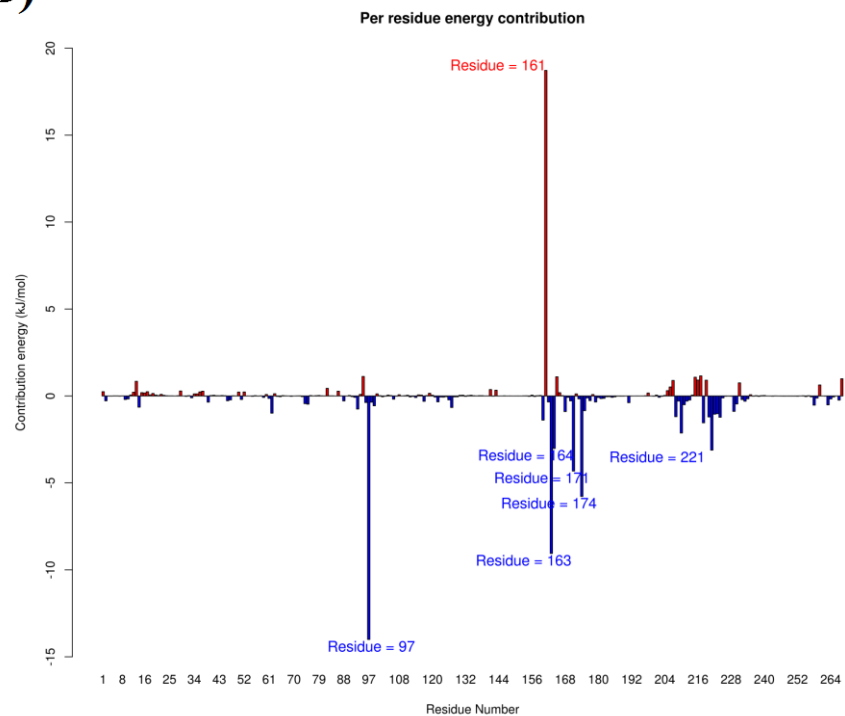

**Figure 11M:** Energetic contribution of the of *TbPTR1* residues in binding. The energies of the *TbPTR1*-RUBi013 complex are given as kilojoules per mole. A)  $\Delta E_{\text{MM}}$ ,  $\Delta E_{\text{polar}}$ ,  $\Delta E_{\text{nonpolar}}$  and  $\Delta E_{\text{binding}}$  as a function of time B) Binding energy contribution energy for each residue.

A)

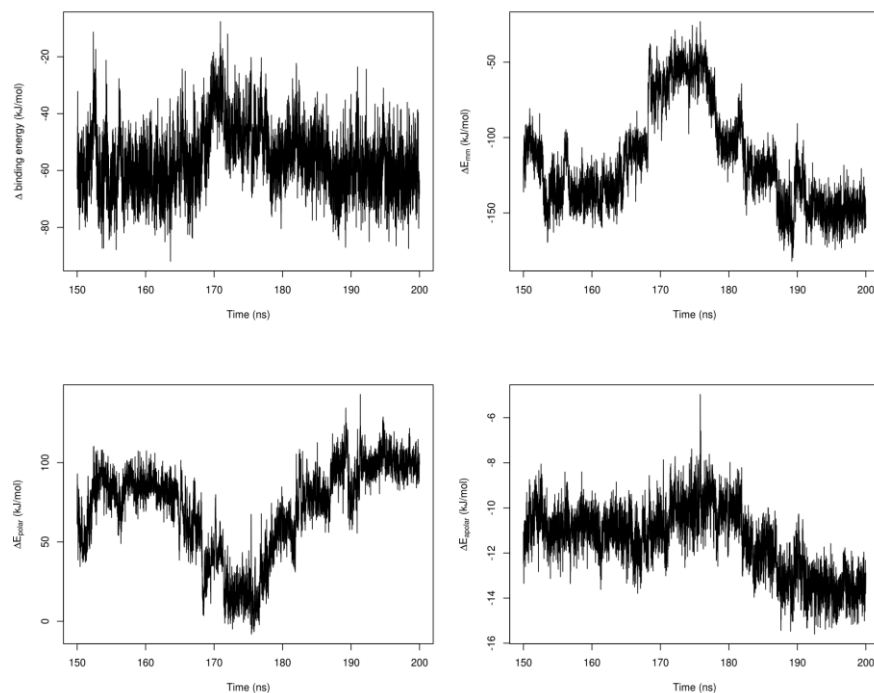

B)

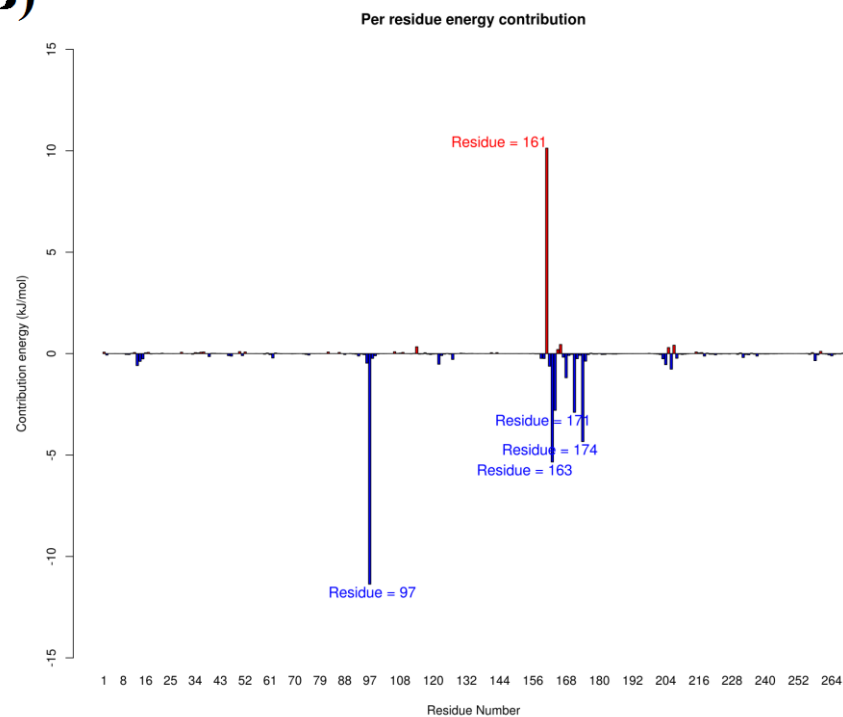

**Figure 11N:** Energetic contribution of the of *Tb*PTR1 residues in binding. The energies of the *Tb*PTR1-RUBi014 complex are given as kilojoules per mole. A)  $\Delta E_{MM}$ ,  $\Delta E_{polar}$ ,  $\Delta E_{nonpolar}$  and  $\Delta E_{binding}$  as a function of time B) Binding energy contribution energy for each residue.

A)

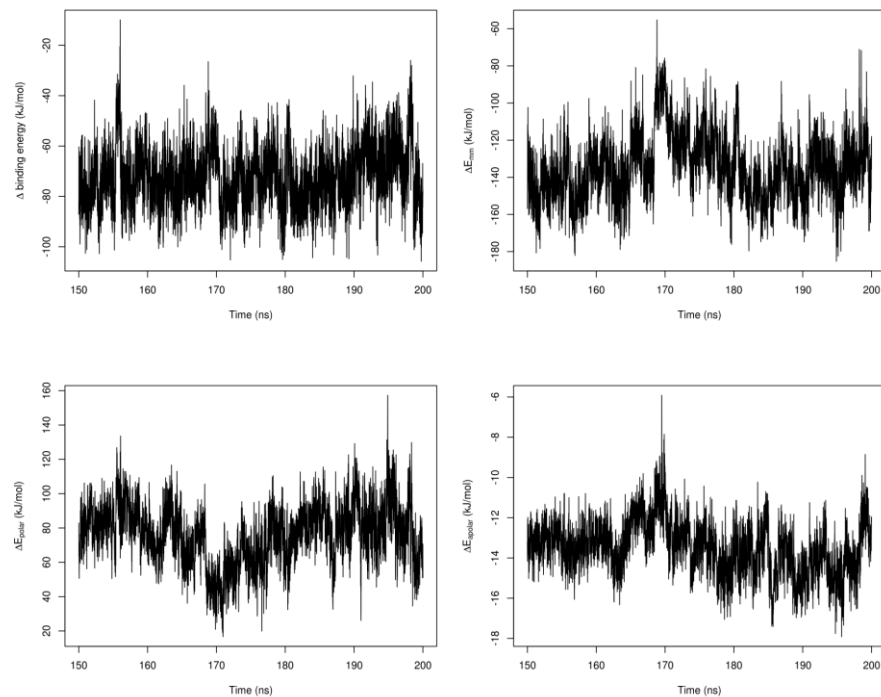

B)

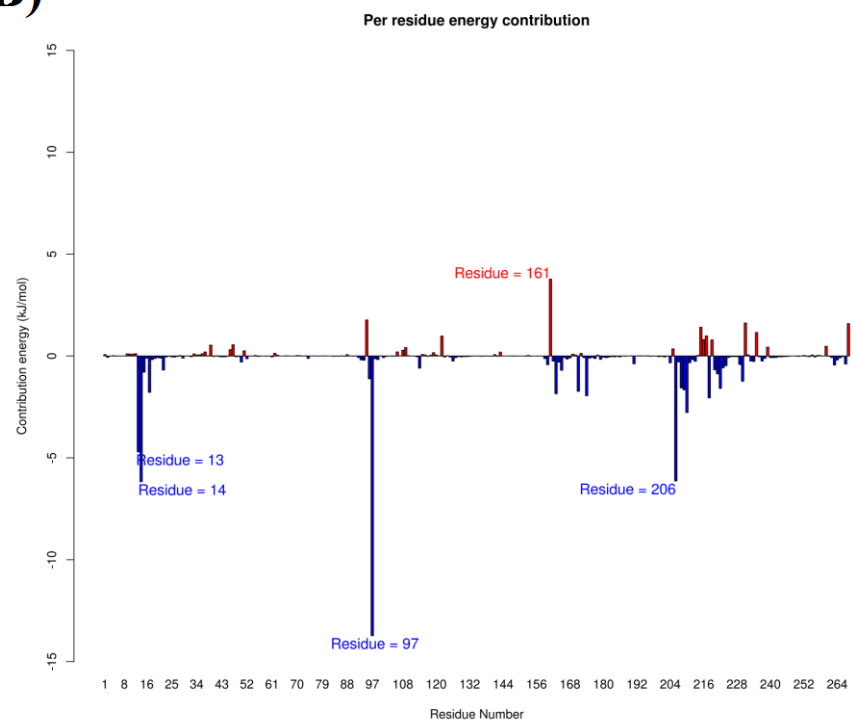

**Figure 110:** Energetic contribution of the of *TbPTR1* residues in binding. The energies of the *TbPTR1*-RUBi015 complex are given as kilojoules per mole. A)  $\Delta\_E\_MM$ ,  $\Delta\_G\_polar$ ,  $\Delta\_G\_nonpolar$  and  $\Delta\_G\_binding$  as a function of time B) Binding energy contribution energy for each residue.

**A)**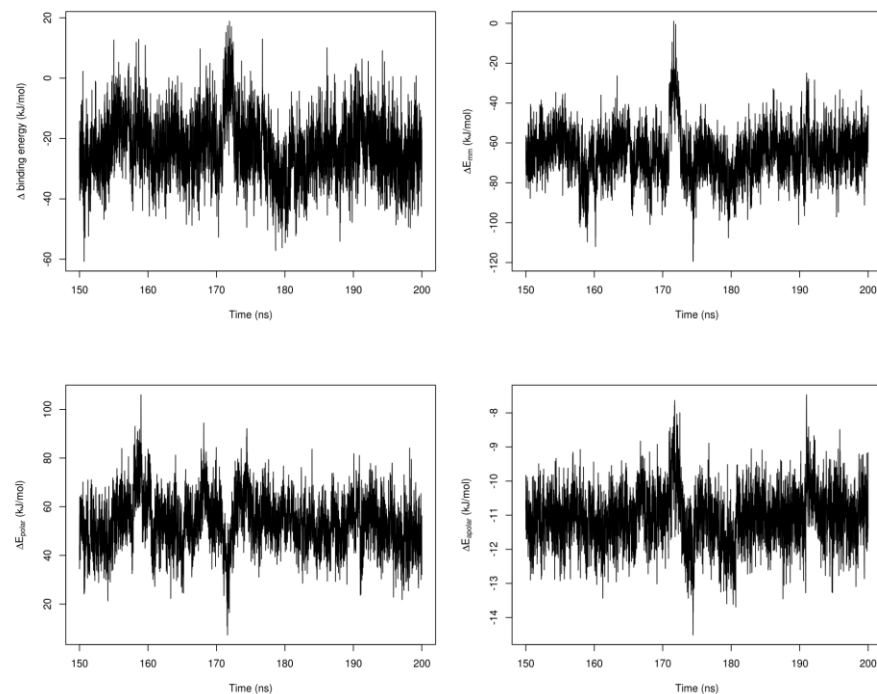**B)**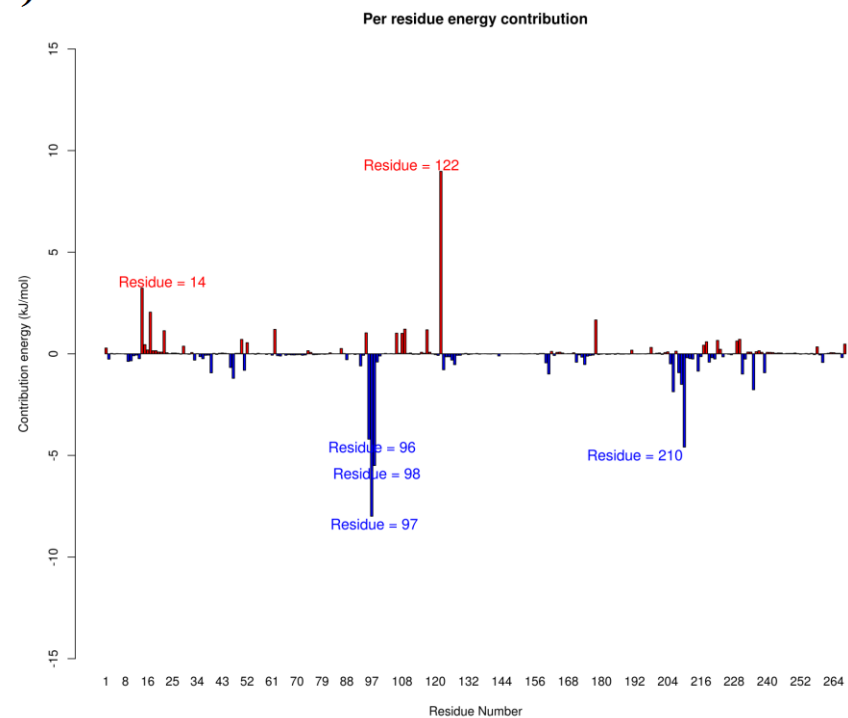

**Figure 11P:** Energetic contribution of the of *Tb*PTR1 residues in binding. The energies of the *Tb*PTR1-RUBi016 complex are given as kilojoules per mole. A)  $\Delta E_{\text{MM}}$ ,  $\Delta E_{\text{polar}}$ ,  $\Delta E_{\text{nonpolar}}$  and  $\Delta E_{\text{binding}}$  as a function of time B) Binding energy contribution energy for each residue.

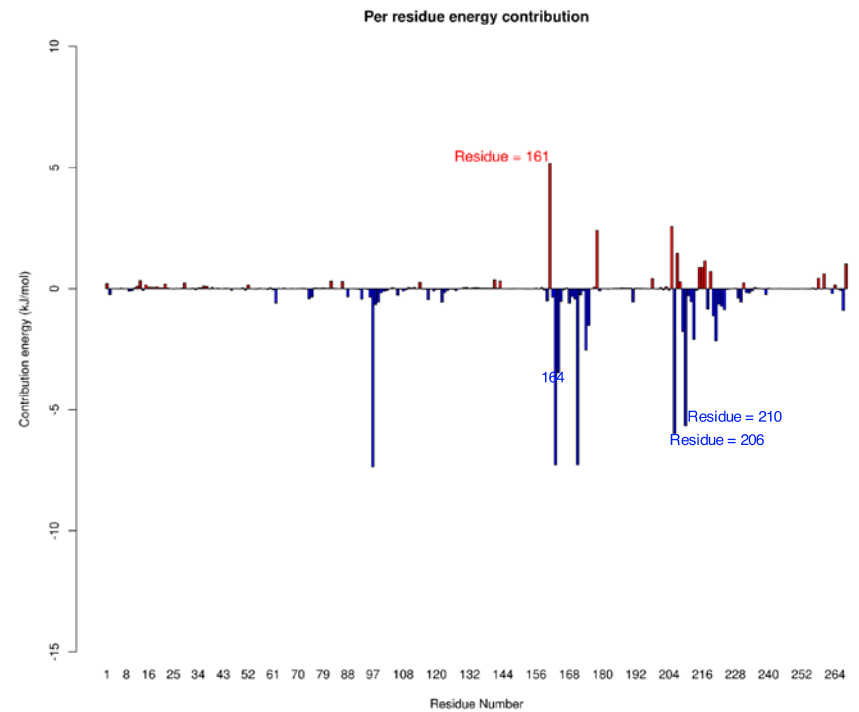

**Figure 11R:** Energetic contribution of the of *Tb*PTR1 residues in binding. The energies of the *Tb*PTR1-RUBi017 complex are given as kilojoules per mole. A)  $\Delta_E_{MM}$ ,  $\Delta_G_{polar}$ ,  $\Delta_G_{nonpolar}$  and  $\Delta_G_{binding}$  as a function of time B) Binding energy contribution energy for each residue.

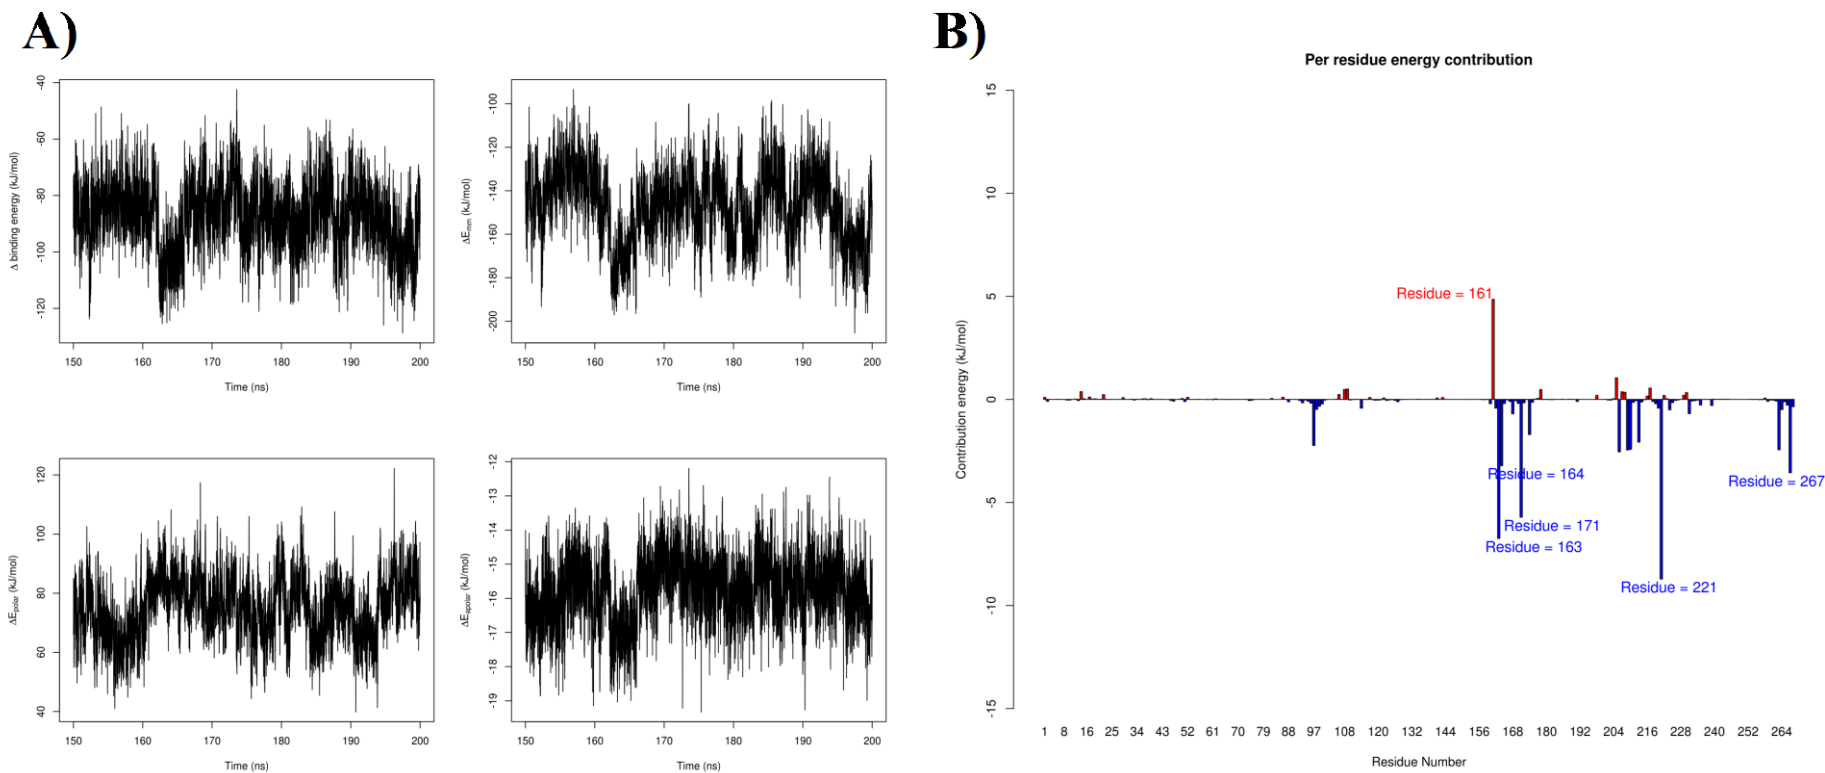

**Figure 11S:** Energetic contribution of the of *TbPTR1* residues in binding. The energies of the *TbPTR1*-RUBi018 complex are given as kilojoules per mole. A)  $\Delta E_{MM}$ ,  $\Delta G_{polar}$ ,  $\Delta G_{nonpolar}$  and  $\Delta G_{binding}$  as a function of time B) Binding energy contribution energy for each residue.



Supplementary Figure S12: Cytotoxicity IC<sub>50</sub>s for RUBi004 and RUBi014

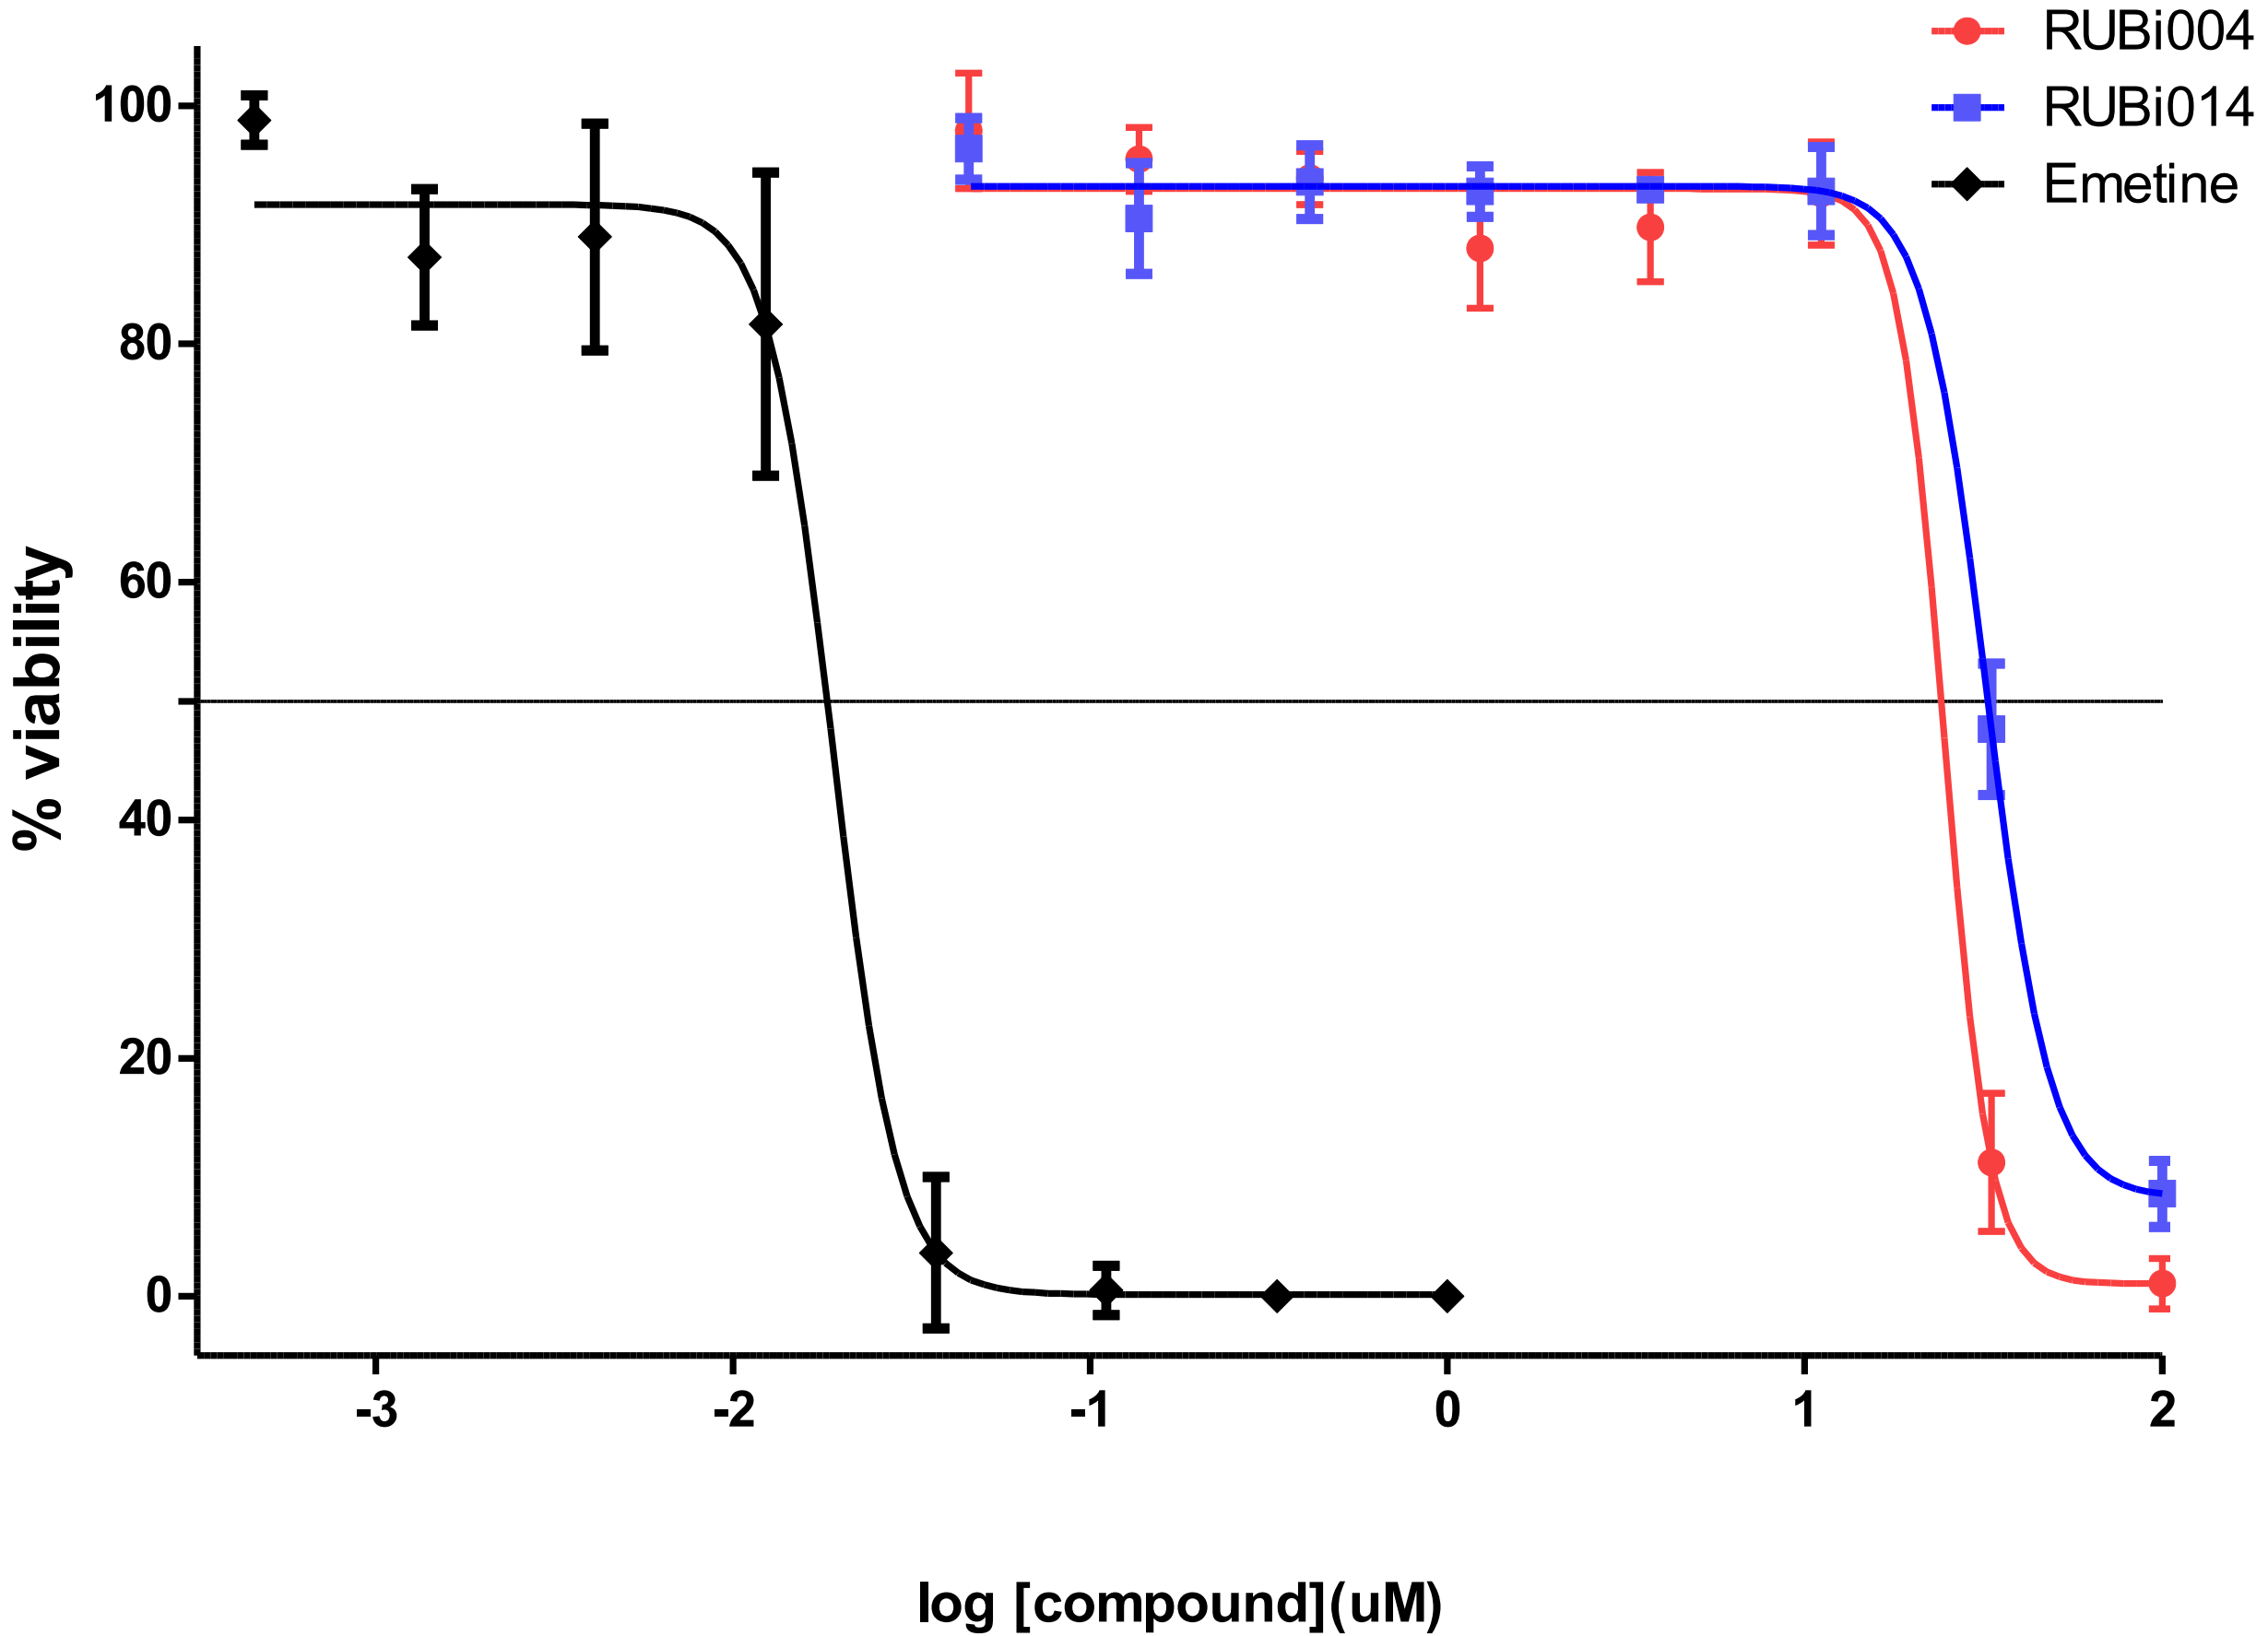

**Supplementary Figure S13:** Per residue Root mean square fluctuations (RMSF), average Betweenness Centrality (BC) and average shortest path (L) of *TbPTR1* residues.

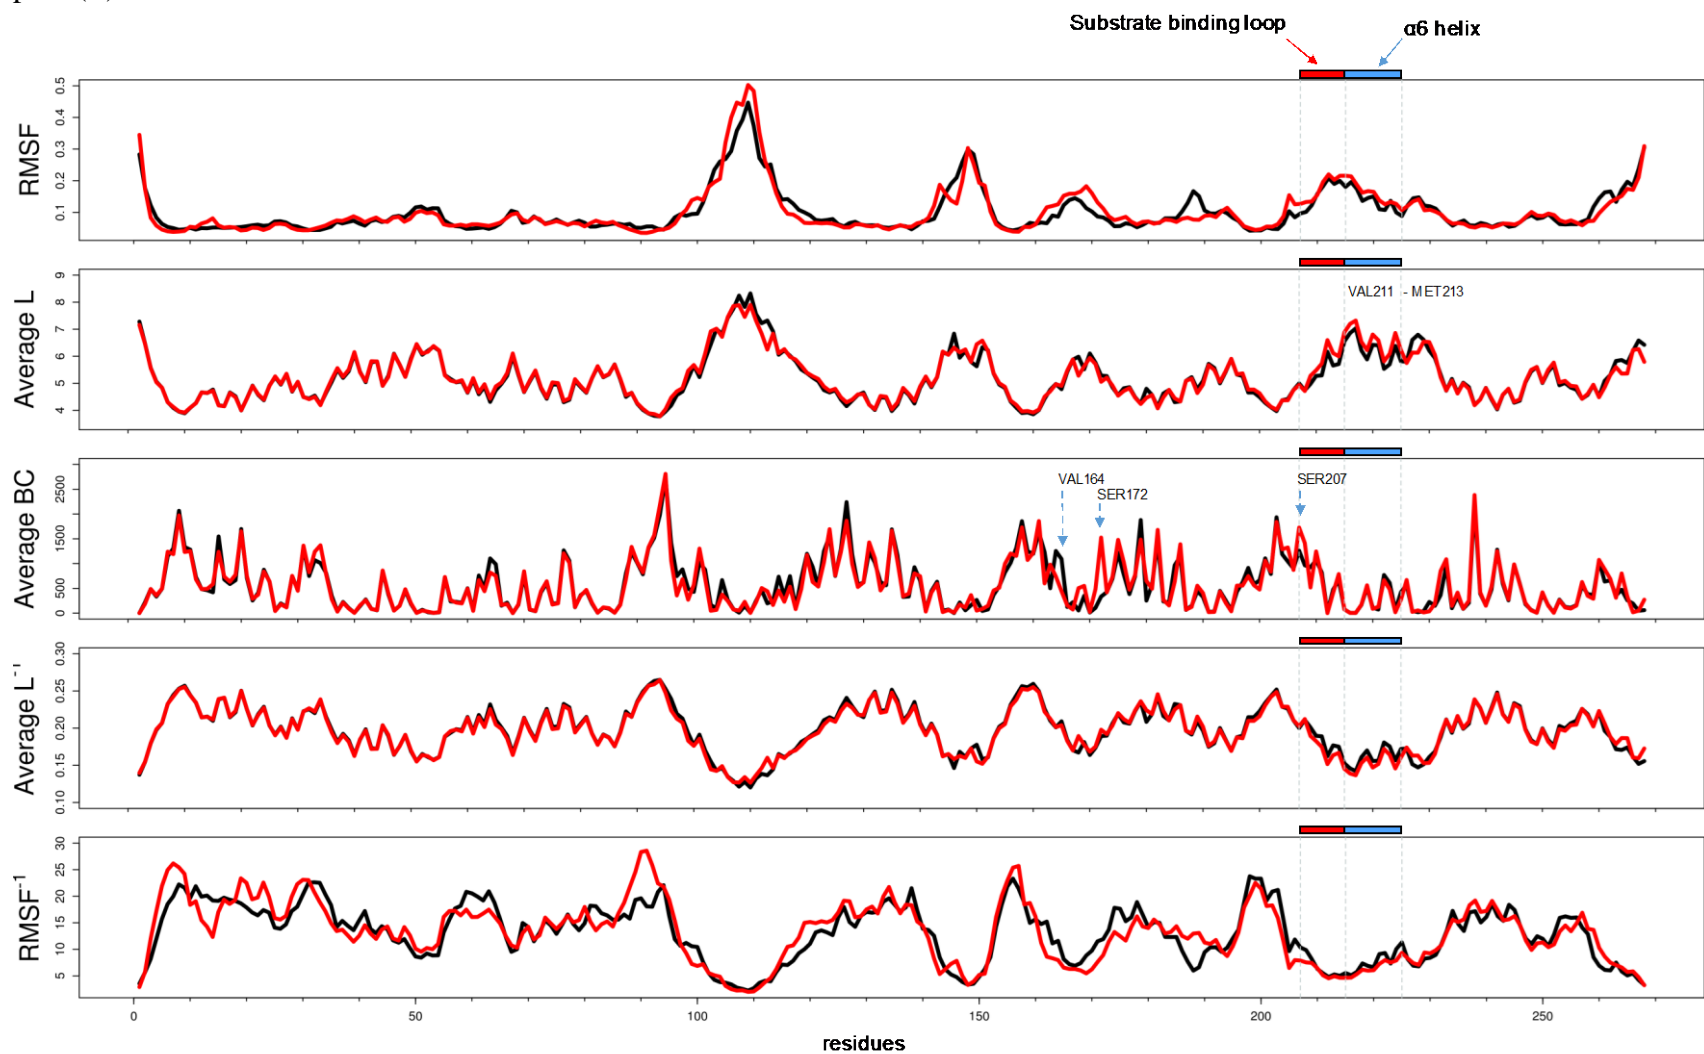

**Figure 13A:** The RMSF, average BC, average L,  $RMSF^{-1}$ , and average  $L^{-1}$  of the backbone protein in the protein-ligand complex shown as a function of time. The apo protein was colored black and the *TbPTR1*-RUBi004 complex red.

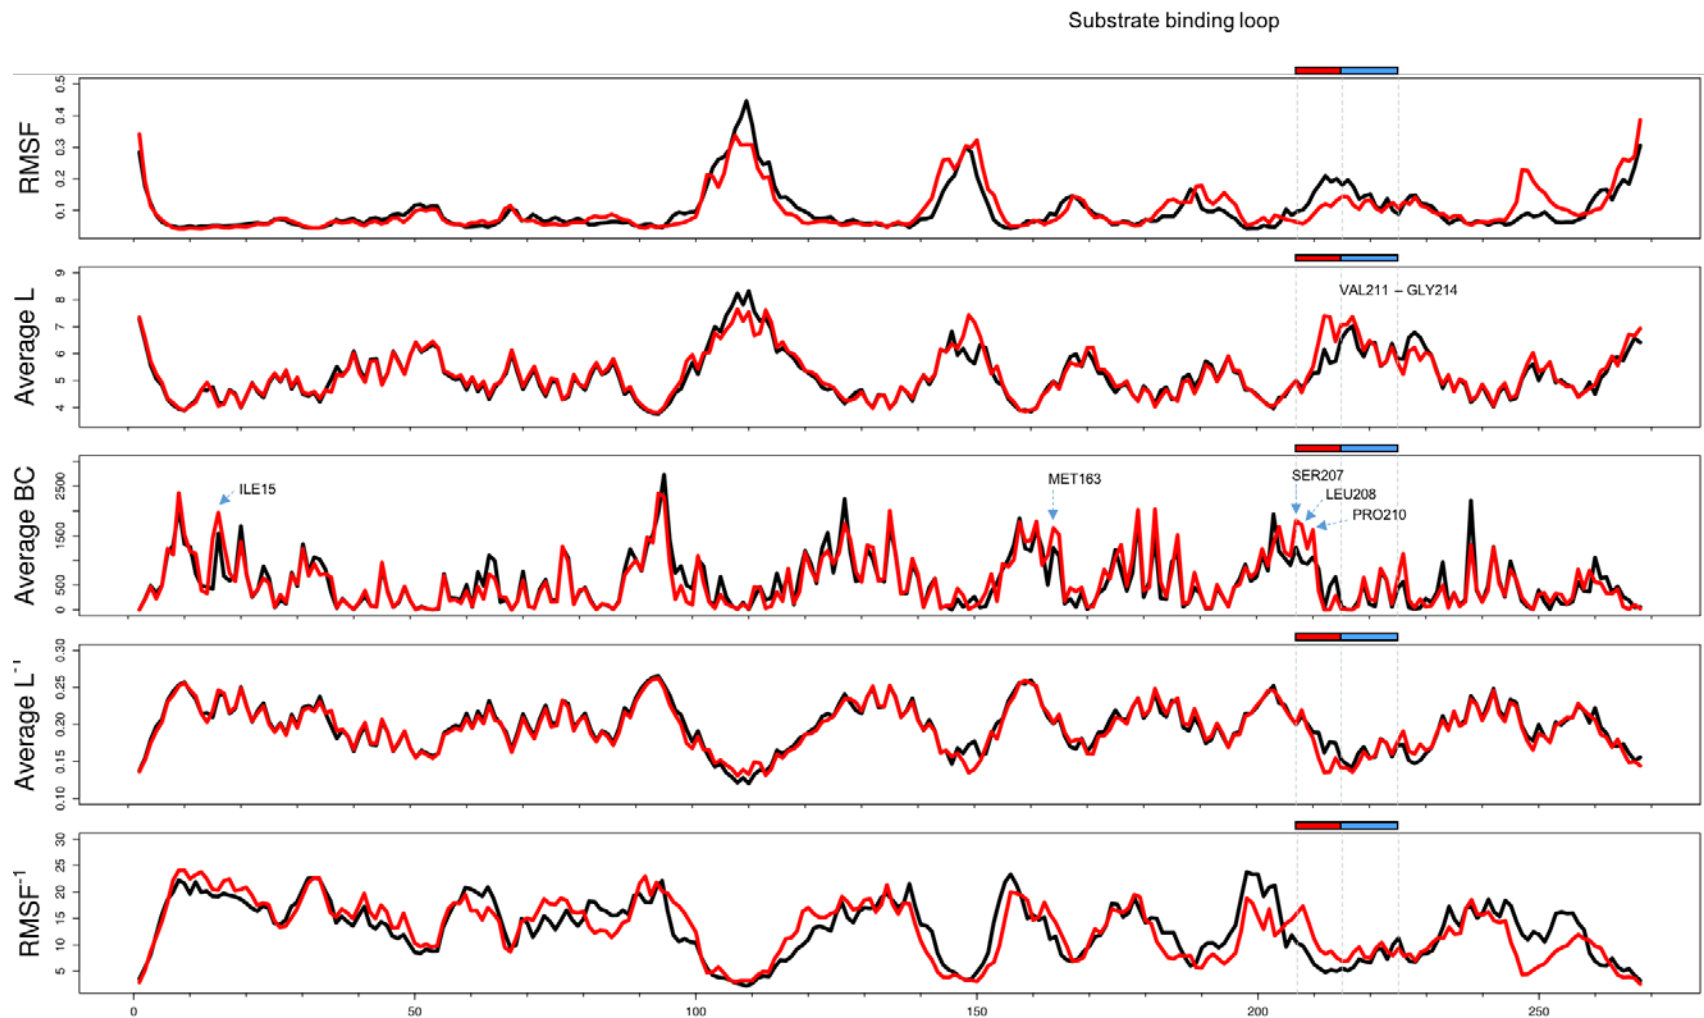

**Figure 13B:** The RMSF, average BC, average L,  $RMSF^{-1}$ , and average  $L^{-1}$  of the backbone protein in the protein-ligand complex shown as a function of time. The apo protein was colored black and the *Tb*PTR1-RUBi007 complex red.

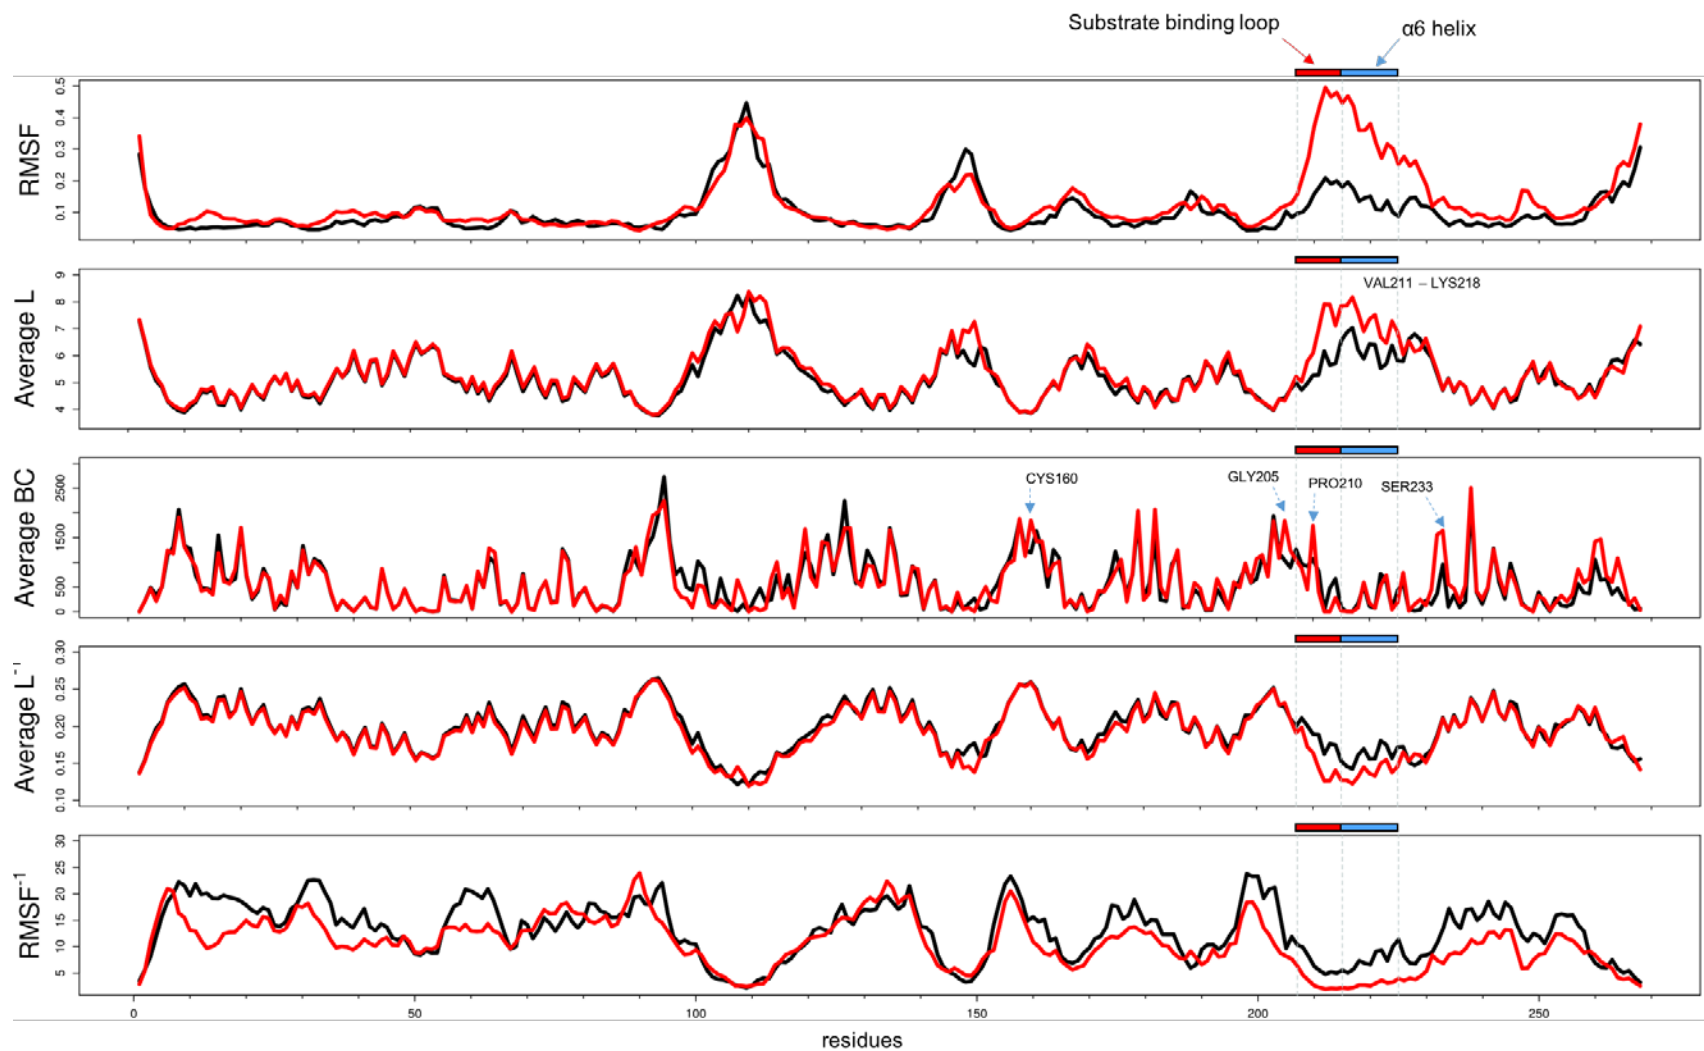

**Figure 13C:** The RMSF, average BC, average L, RMSF $^{-1}$ , and average L $^{-1}$  of the backbone protein in the protein-ligand complex shown as a function of time. The apo protein was colored black and the *Tb*PTR1-RUBi014 complex red.

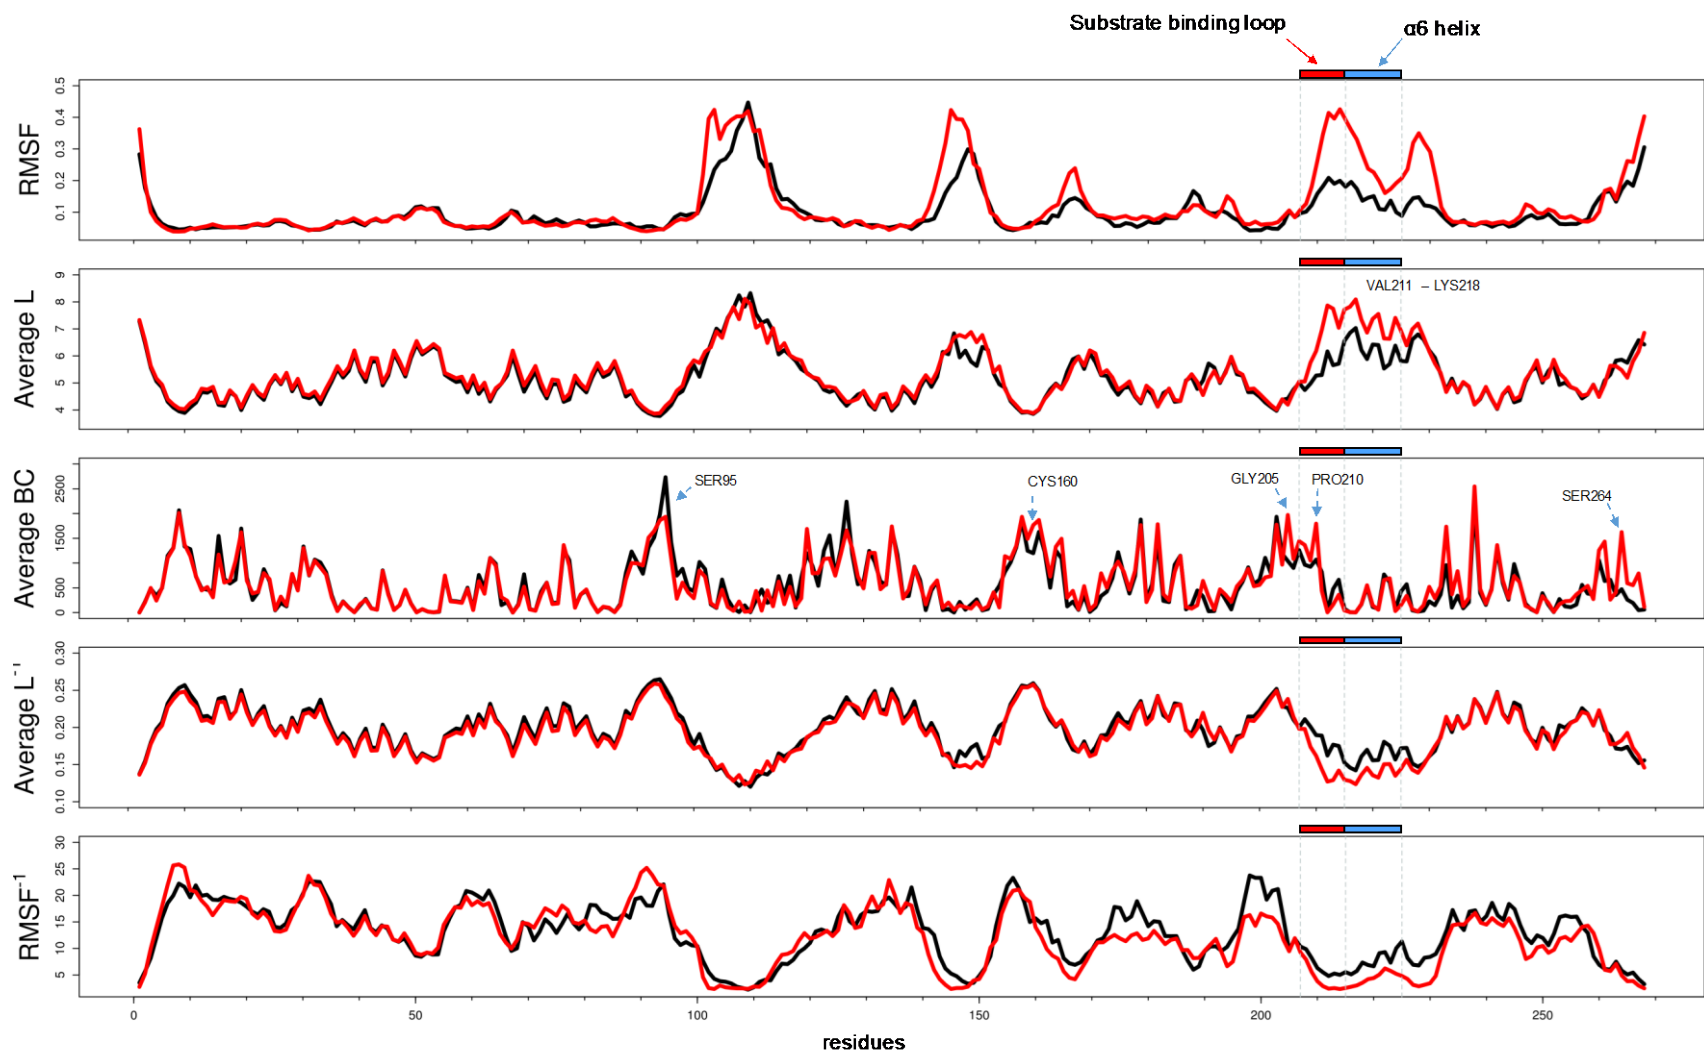

**Figure 13D:** The RMSF, average BC, average L, RMSF<sup>-1</sup>, and average L<sup>-1</sup> of the backbone protein in the protein-ligand complex shown as a function of time. The apo protein was colored black and the *Tb*PTR1-RUBi016 complex red.

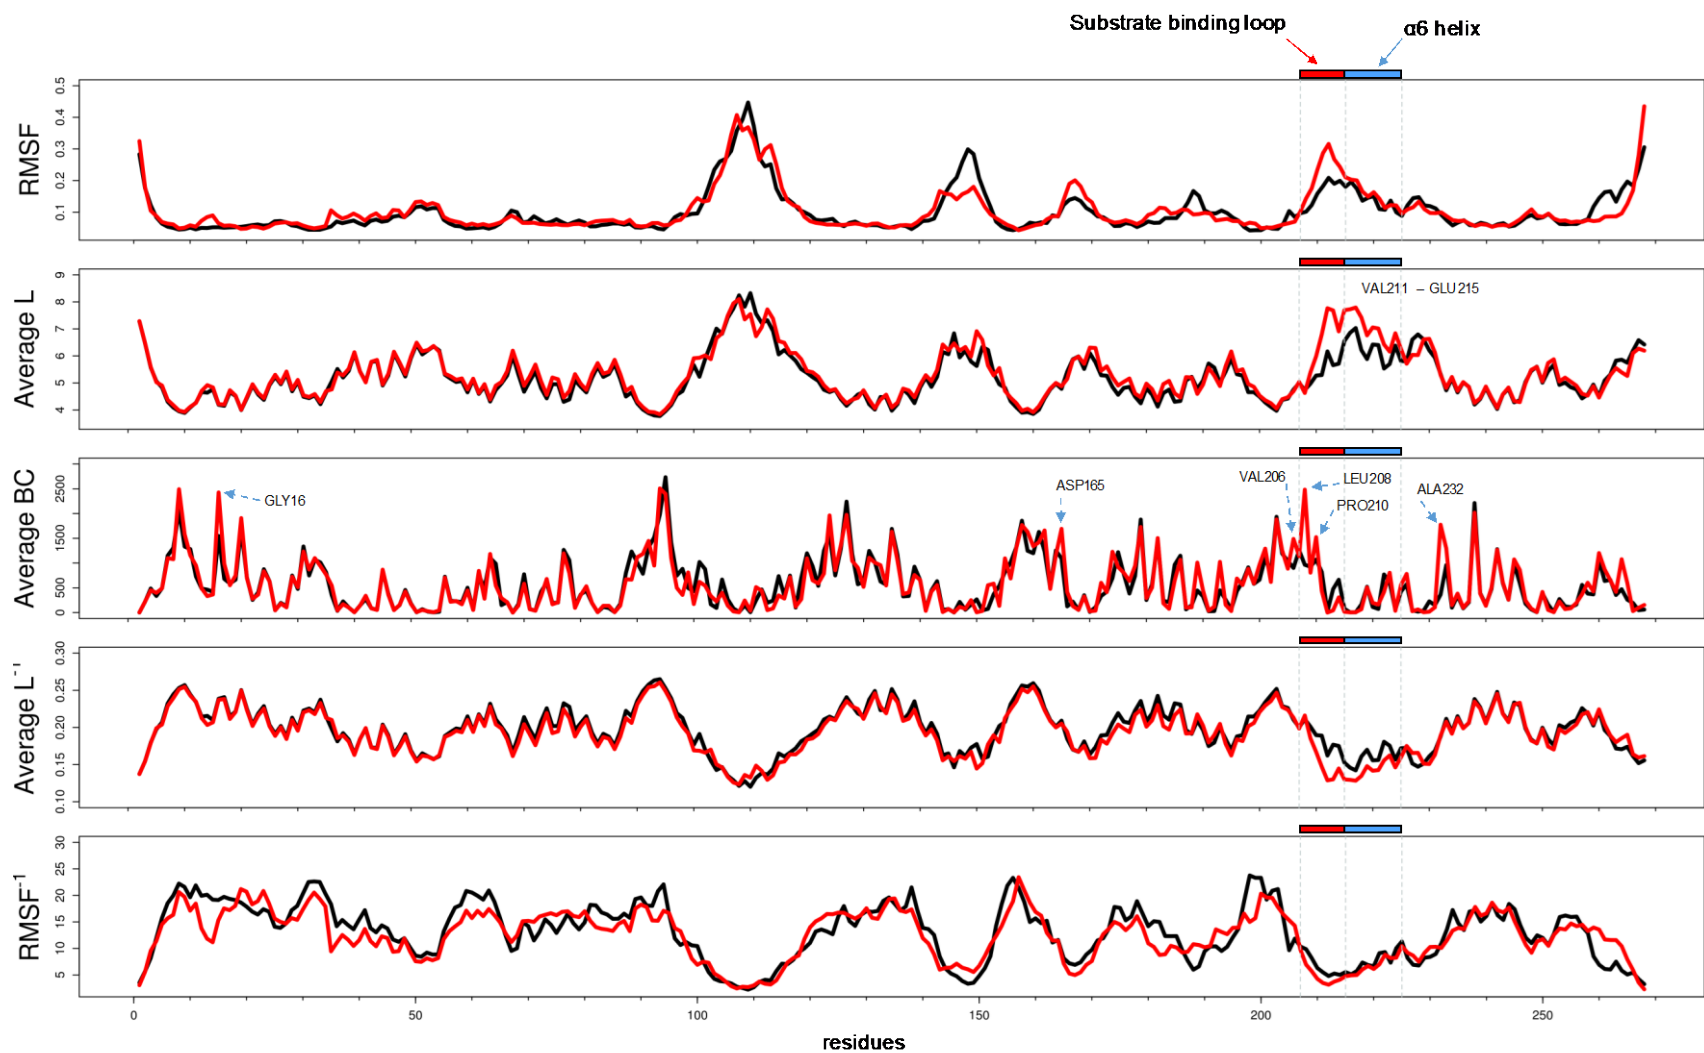

**Figure 13E:** The RMSF, average BC, average L, RMSF<sup>-1</sup>, and average L<sup>-1</sup> of the backbone protein in the protein-ligand complex shown as a function of time. The apo protein was colored black and the *Tb*PTR1-RUBi018 complex red.

**Supplementary Figure S14: 2D interaction diagram around selected residues**

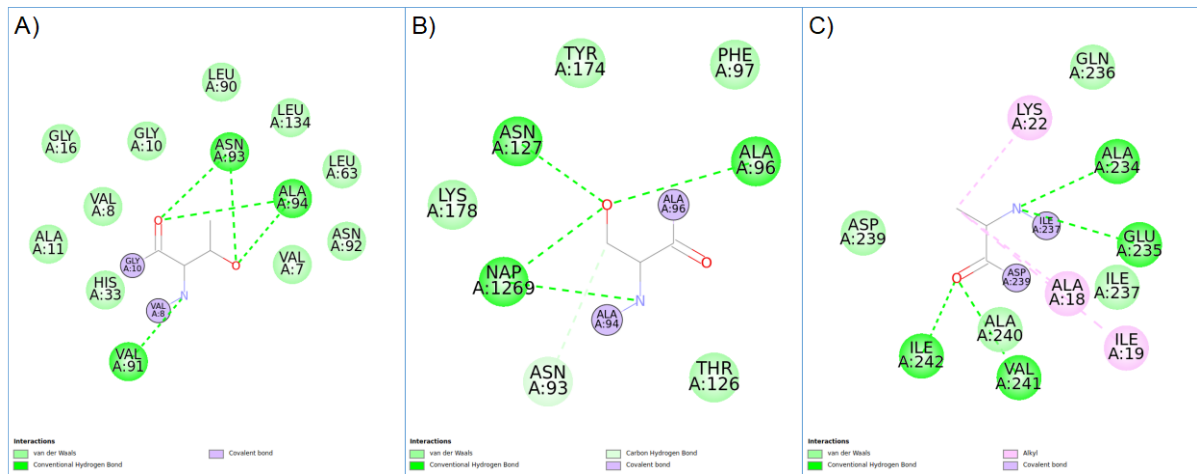

**Figure 1:** 2D interaction network around residues in *TbPTR1* (PDB:2X9N). A) THR9, B) SER95, and C) ALA238

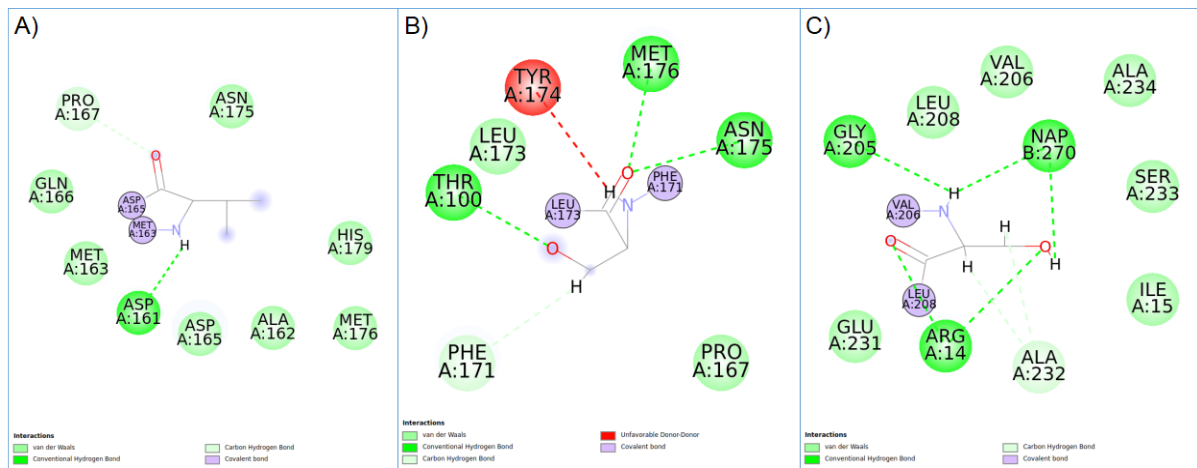

**Figure 2:** 2D interaction network around residues RUBi004-*TbPTR1* complex (PDB:2X9N). A) VAL164, B) SER172, and C) SER207

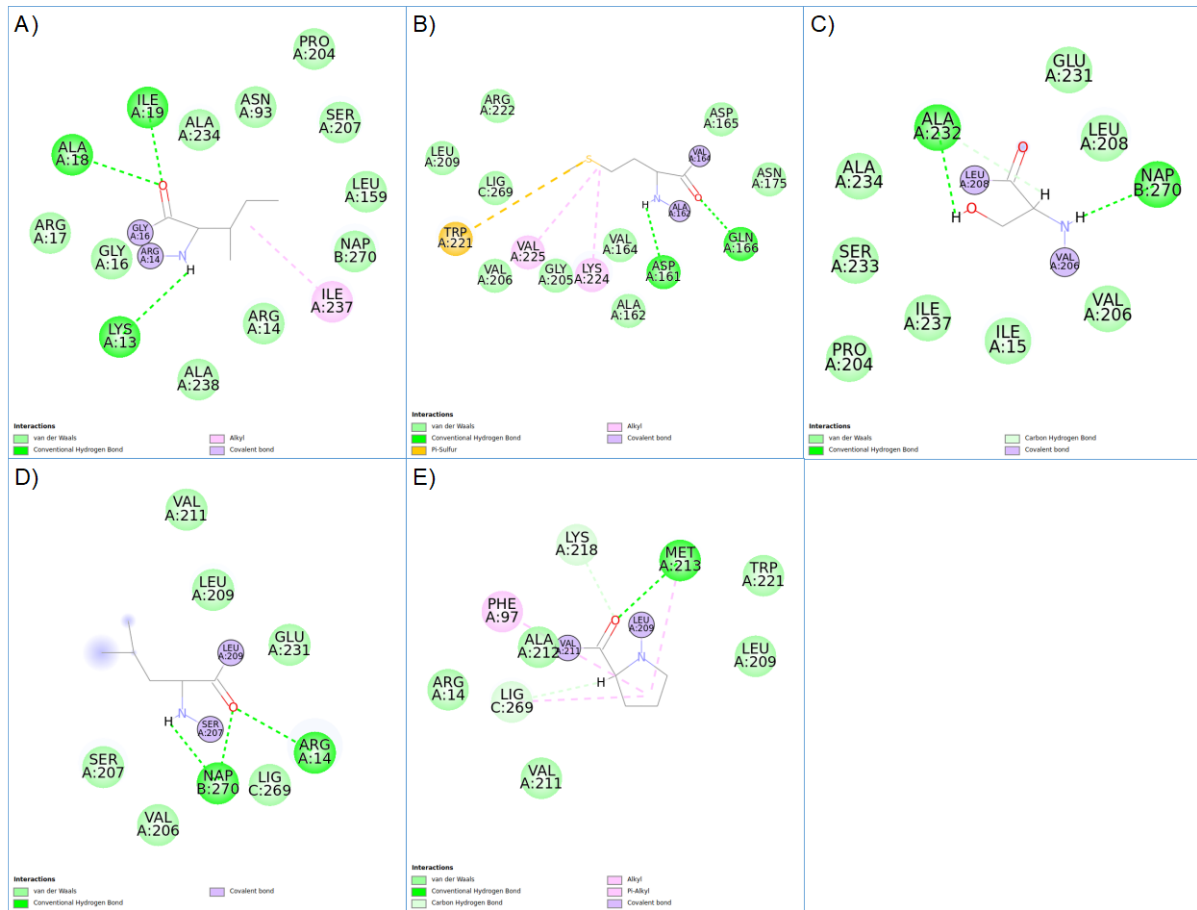

**Figure 3:** 2D interaction network around residues RUBi007-*TbPTR1* complex (PDB:2X9N). A) ILE15, B) MET163, C) SER207, D) LEU208, and E) PRO210



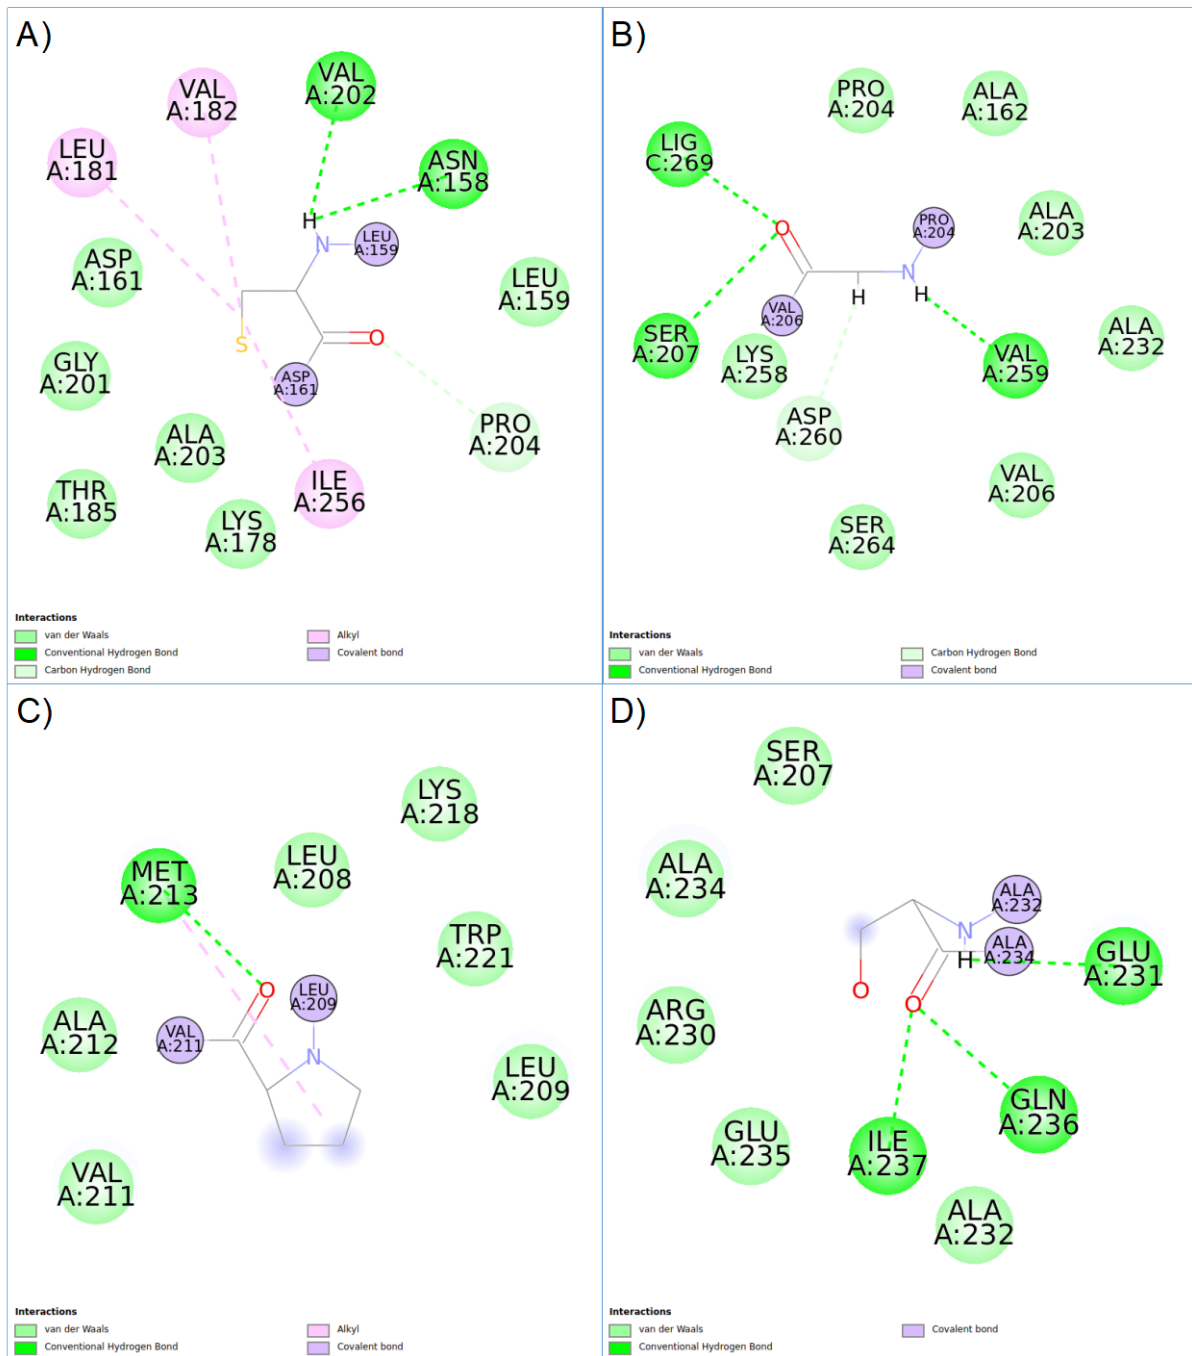

**Figure 4:** 2D interaction network around residues RUBi014-*TbPTR1* complex (PDB:2X9N). A) CYS160, B) GLY205, C) PRO210, and D) SER233

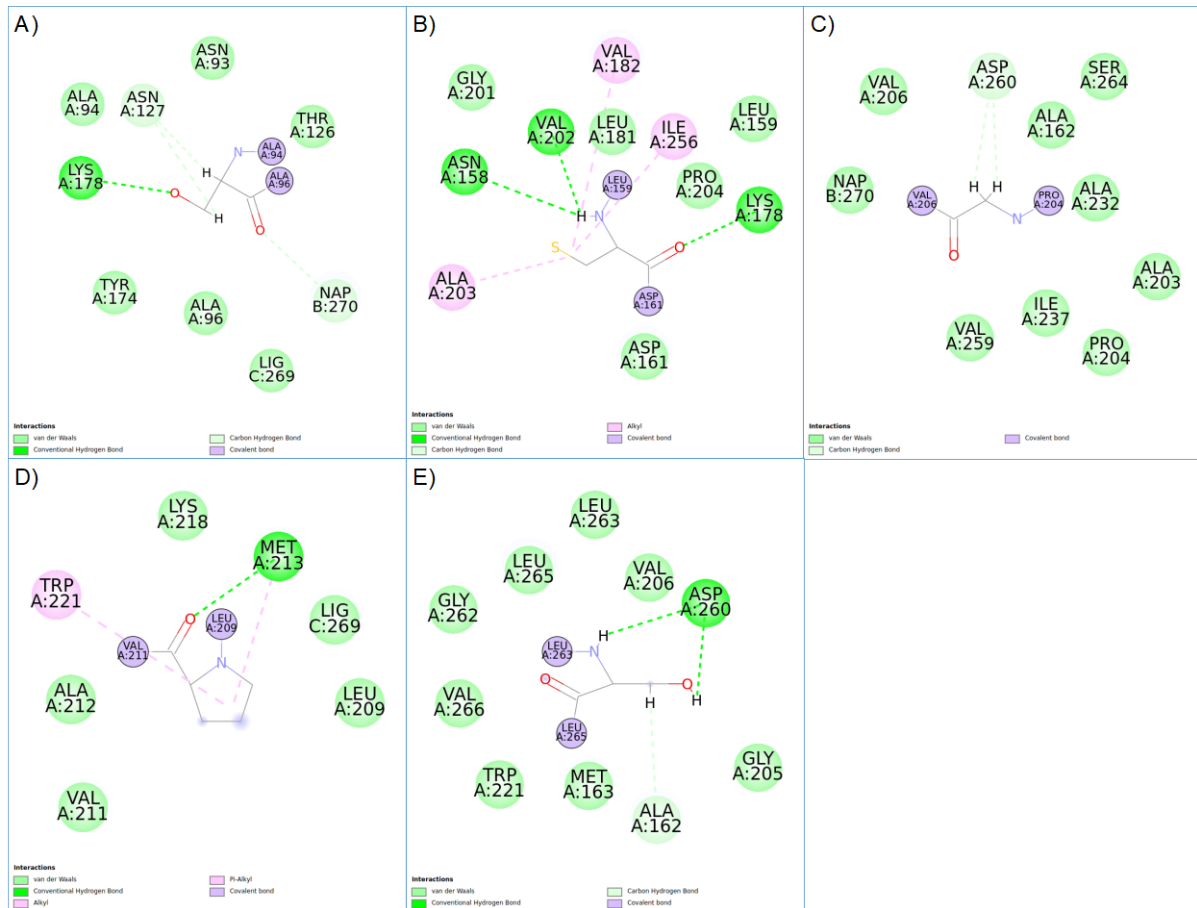

**Figure 5:** 2D interaction network around residues RUBi016-*TbPTR1* complex (PDB:2X9N). A) SER95, B) CYS160, C) GLY205, D) PRO210, and E) SER264

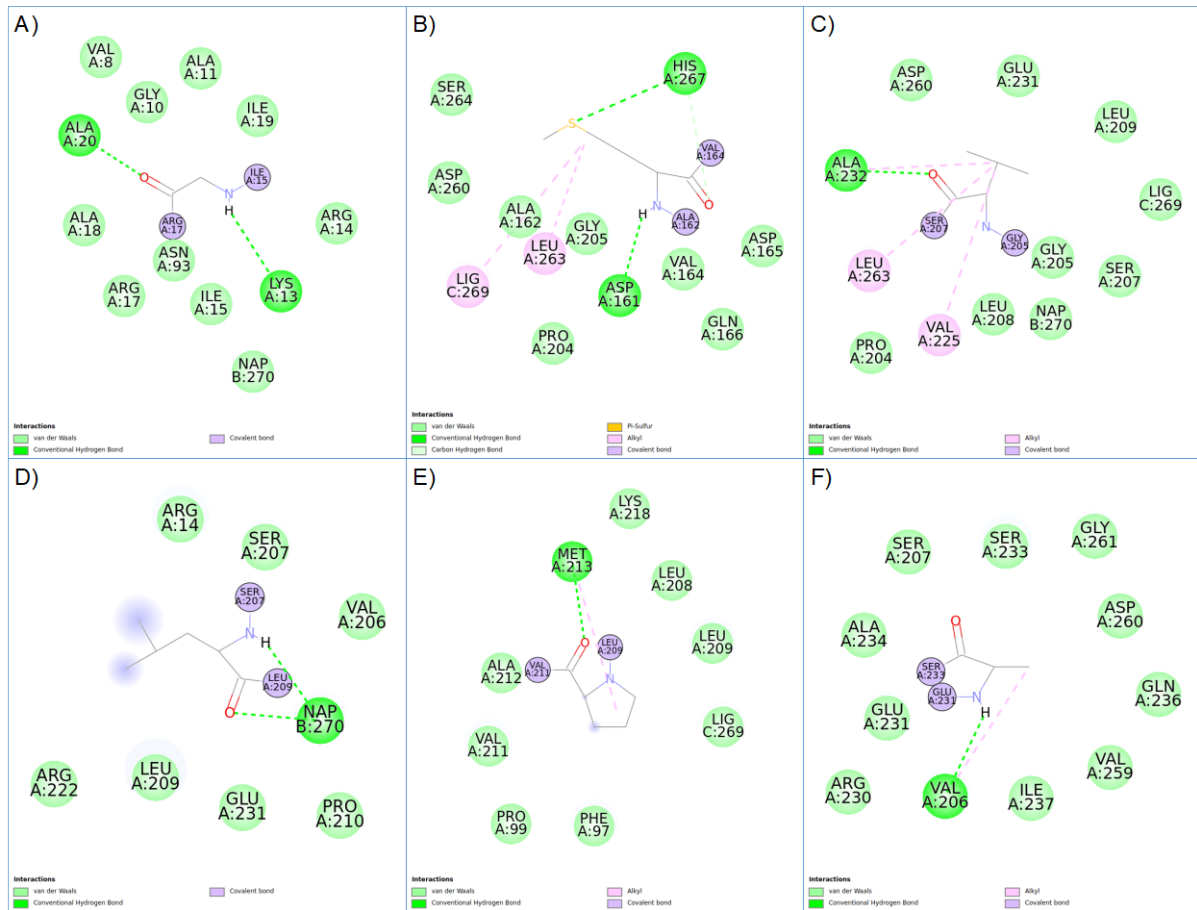

**Figure 6:** 2D interaction network around residues RUBi018-7bPTR1 complex (PDB:2X9N). A) GLY16, B) ASP165, C) VAL206, D) LEU208, E) PRO210, and F) ALA232

**Supplementary Figure S15:** Validation of *T. brucei* and *T. cruzi* PTR1 homology models using z-DOPE score and residue score using ProSA. The structural validation of *Tb*PTR1 is shown in A) and B) while that of *Tc*PTR1 in C) and D). Both models show overall reliable structural conformations.

A)

**Overall model quality**

Z-Score: **-6.64**

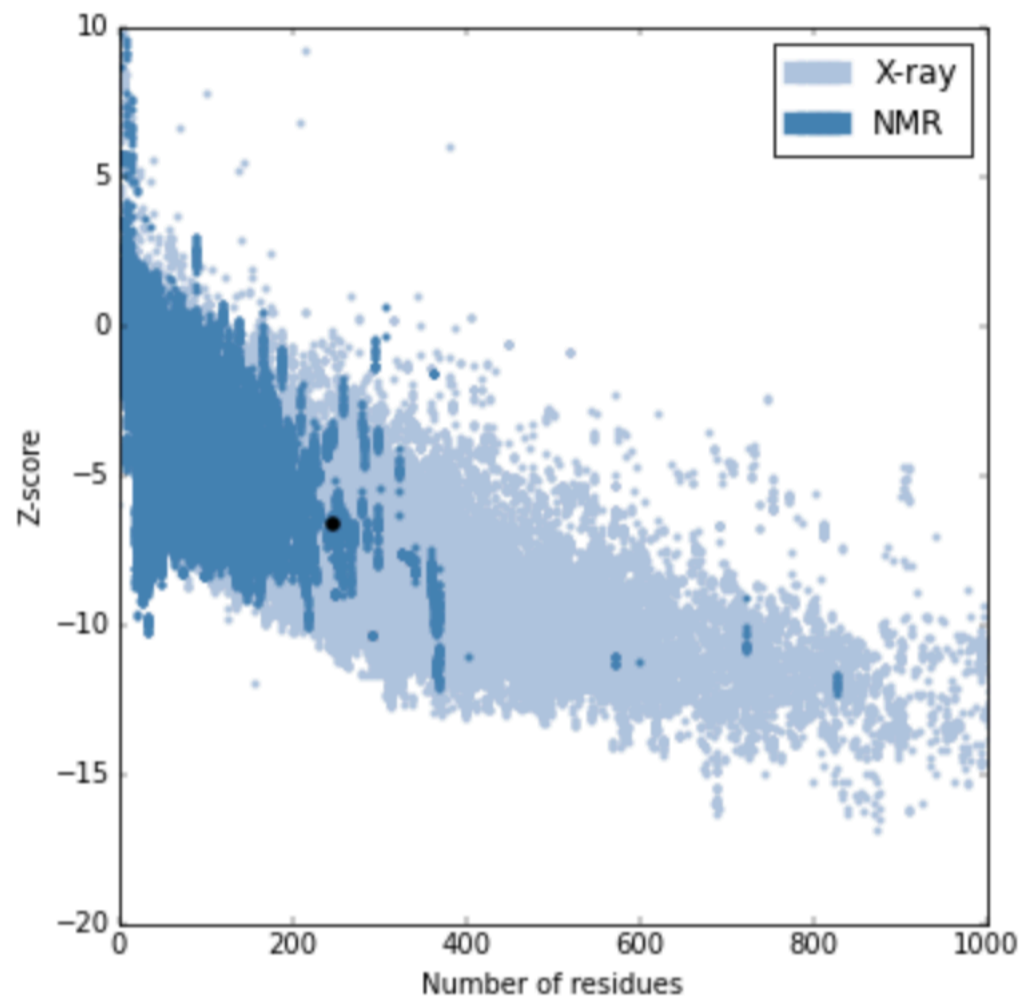

B)

**Local model quality**

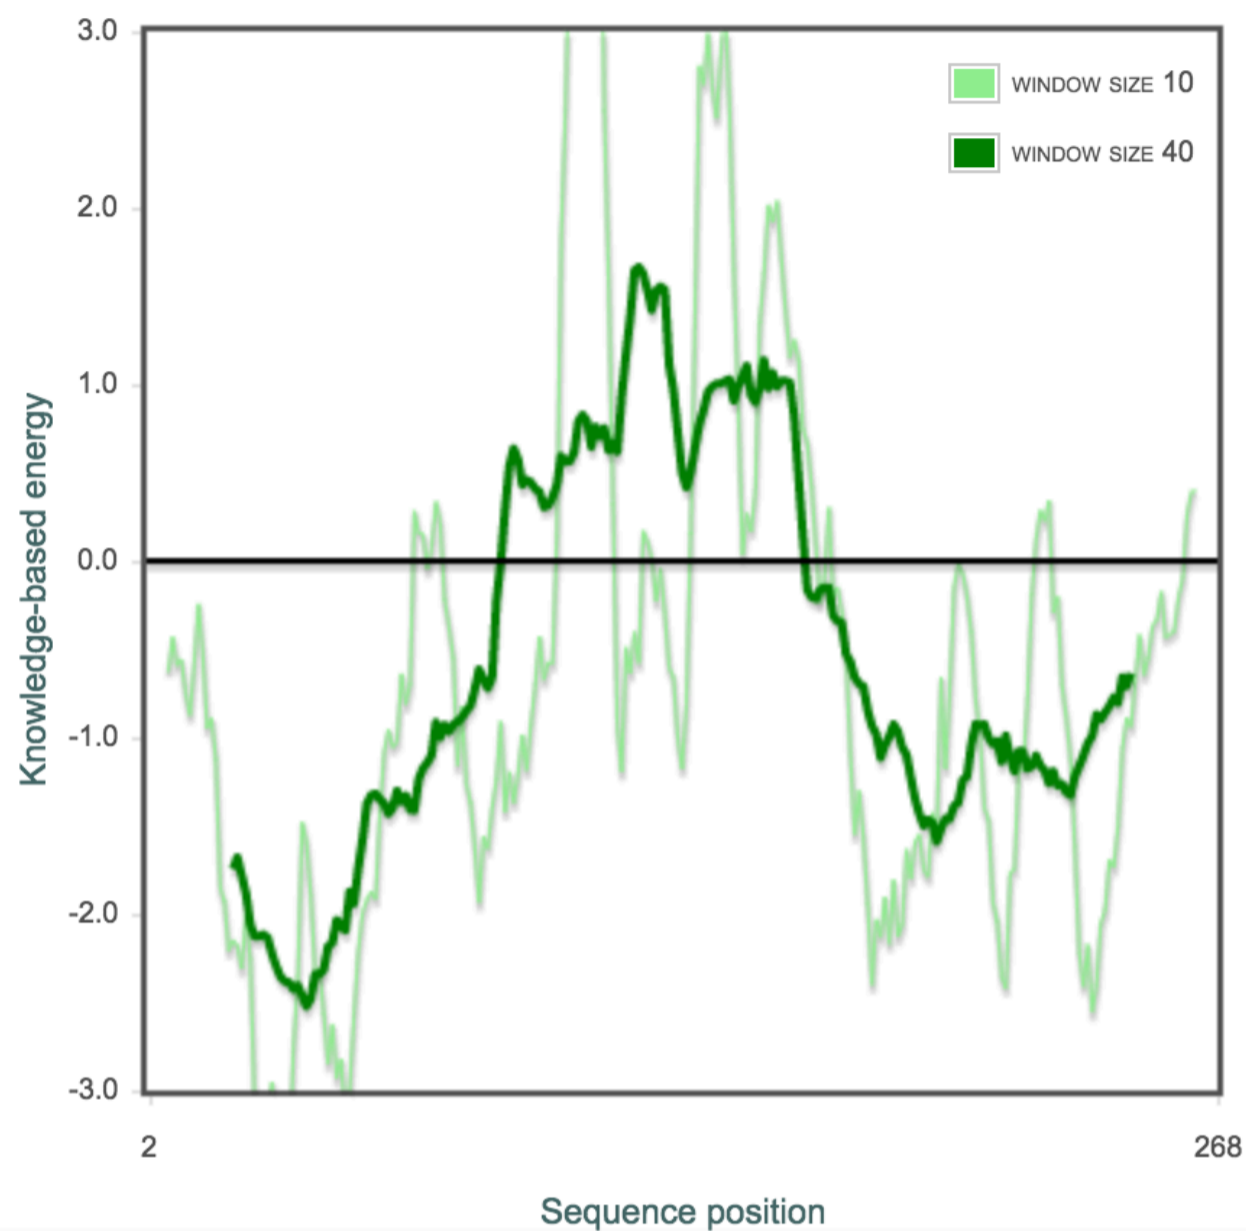

C)

**Overall model quality**

Z-Score: **-8.78**

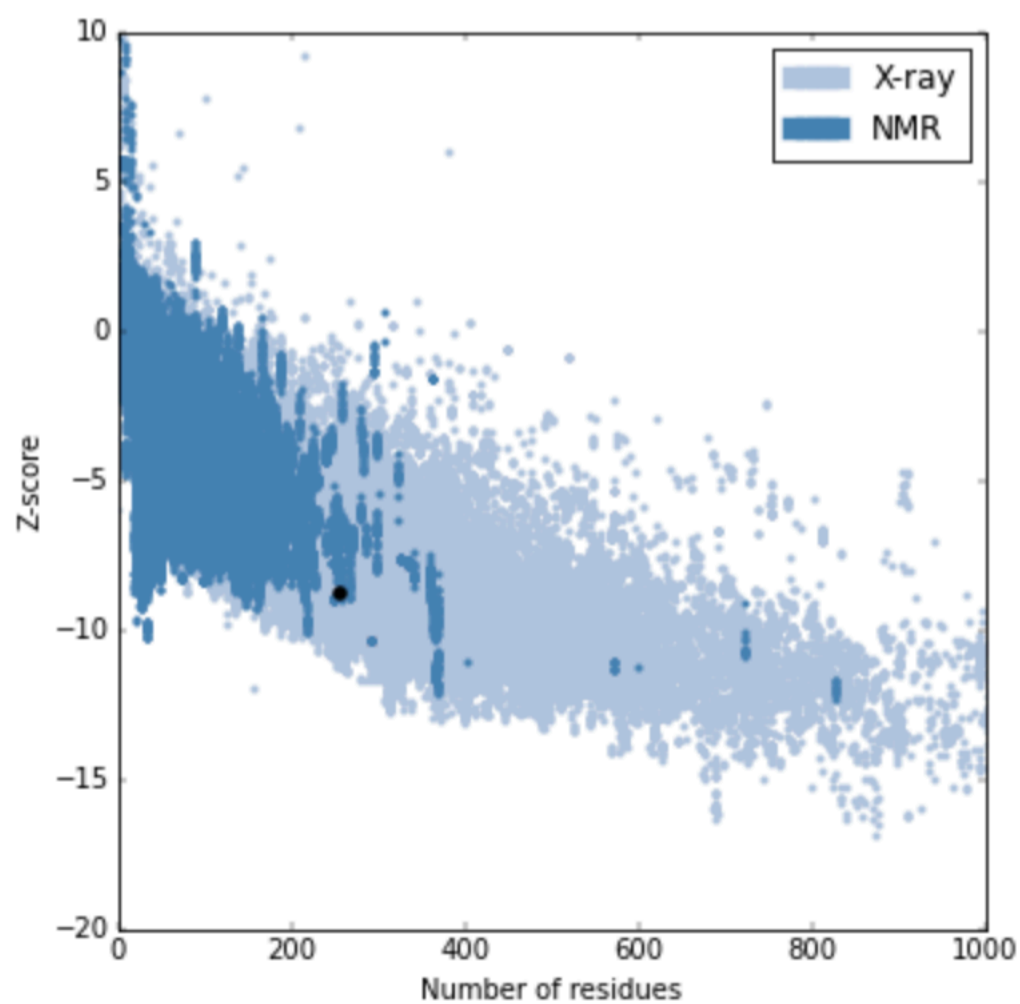

D)

**Local model quality**

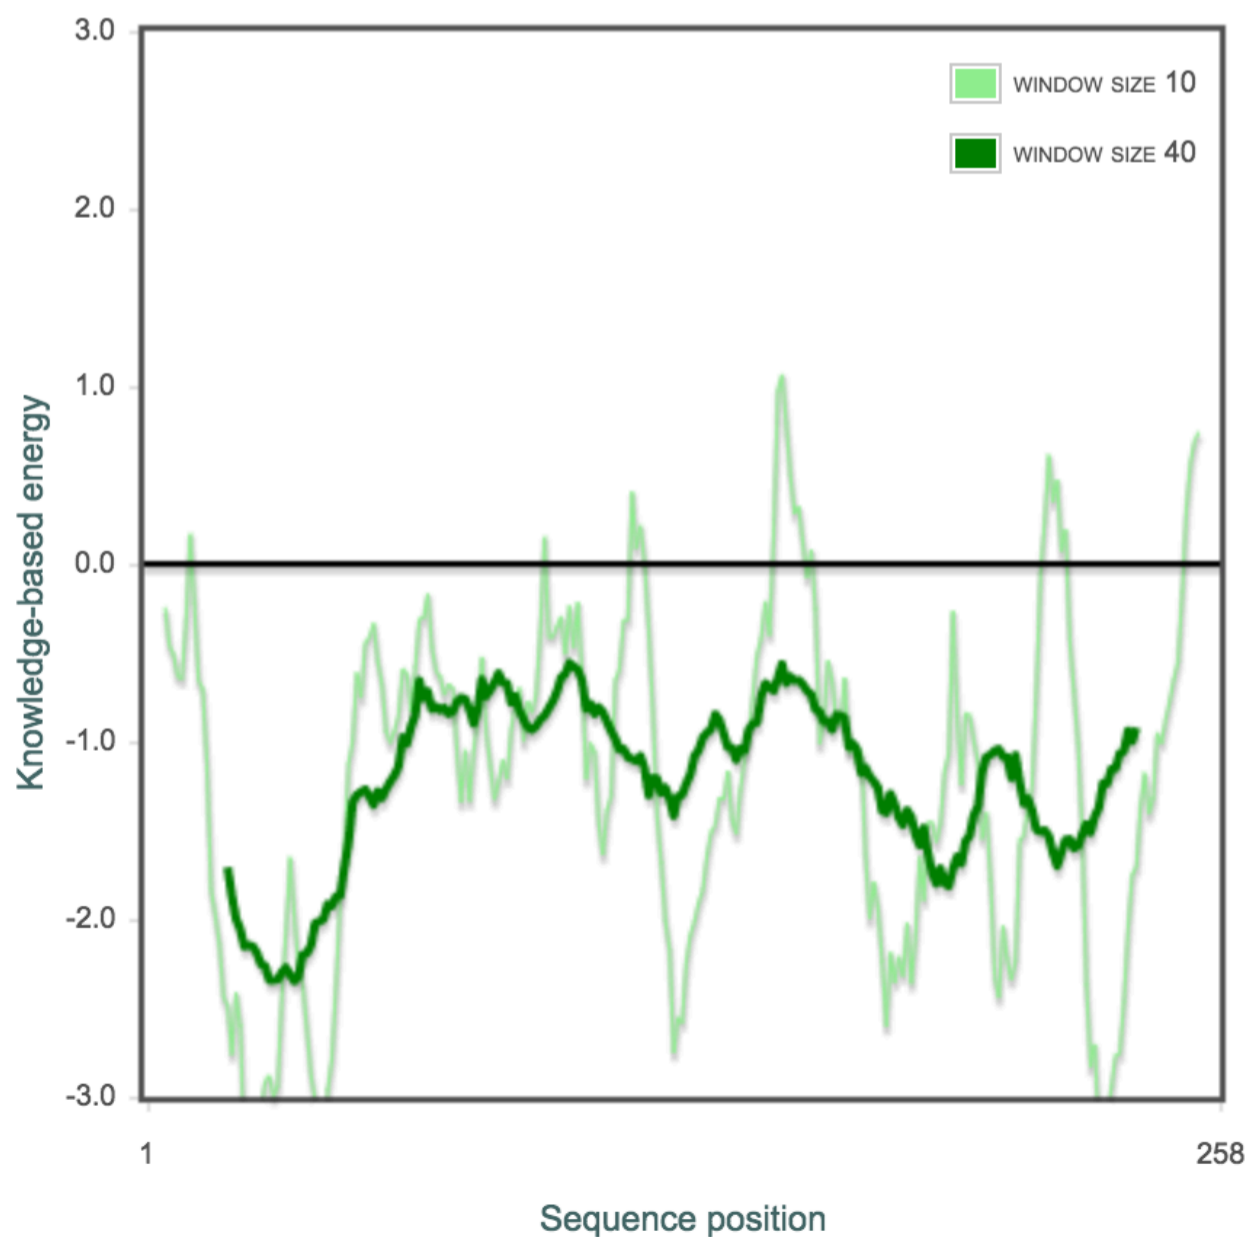

**Table S1:** Binding modes of top *Tb*PTR1 docked compounds

| Compound       | Binding mode                                                                        | Interacting residues                                                               | Autodock Vina (Kcal/mol) | Xscore (Kcal/mol) |
|----------------|-------------------------------------------------------------------------------------|------------------------------------------------------------------------------------|--------------------------|-------------------|
| RUBi001        | 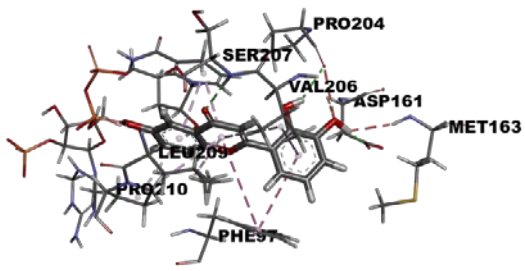   | PHE97,<br>ASP161,<br>MET163,<br>PRO204,<br>VAL206,<br>SER207,<br>LEU209,<br>PRO210 | -10.1                    | -8.3              |
| RUBi002        |    | LYS13,<br>ARG14,<br>ALA96,<br>PHE97,<br>LEU208,<br>PRO210,<br>VAL211,<br>ALA212    | -10.2                    | -8.8              |
| RUBi003        |  | PHE97,<br>MET163,<br>TYR174,<br>VAL206                                             | -9.1                     | -8.2              |
| <b>RUBi004</b> |  | LYS13,<br>PHE97,<br>TYR98,<br>TYR174                                               | -10.3                    | -8.8              |
| RUBi005        |  | PHE97,<br>MET163,<br>CYS168,<br>PHE171,<br>PRO210,<br>ALA212,<br>MET213,<br>TRP221 | -9.0                     | -8.6              |

|         |  |                                                                                              |       |      |
|---------|--|----------------------------------------------------------------------------------------------|-------|------|
| RUBi006 |  | SER95,<br>PHE97,<br>ASP161,<br>TYR174,<br>PRO210,<br>TRP221                                  | -10.2 | -8.1 |
| RUBi007 |  | ARG14,<br>PHE97,<br>GLY205,<br>PRO210,<br>ALA212,<br>TRP221                                  | -9.6  | -8.0 |
| RUBi008 |  | LYS13,<br>ARG14,<br>PHE97,<br>LEU208,<br>LEU209,<br>PRO210                                   | -8.5  | -7.8 |
| RUBi009 |  | PHE97,<br>PRO99,<br>MET163,<br>PHE171,<br>TRP221                                             | -8.9  | -7.7 |
| RUBi010 |  | ILE15,<br>ASN93,<br>MET163,<br>TYR174,<br>VAL206,<br>SER207,<br>LEU208,<br>LEU209,<br>TRP221 | -6.9  | -7.9 |

|                |                                                                                     |                                                                                                                         |      |      |
|----------------|-------------------------------------------------------------------------------------|-------------------------------------------------------------------------------------------------------------------------|------|------|
| RUBi011        | 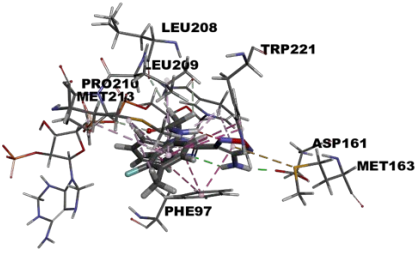   | PHE97,<br>ASP161,<br>MET163,<br>LEU208,<br>LEU209,<br>PRO210,<br>MET213,<br>TRP221                                      | -9.7 | -8.8 |
| RUBi012        |    | PHE97                                                                                                                   | -9.1 | -8.2 |
| RUBi013        |   | PHE97,<br>ASP161,<br>MET163,<br>VAL164,<br>CYS168,<br><br>PHE171,<br>TYR174,<br>GLY205,<br>VAL206,<br>TRP221,<br>LYS224 | -8.7 | -8.4 |
| <b>RUBi014</b> |  | ASP161,<br>MET163,<br>TYR174,<br>ASN175,<br>PRO204,<br>GLY205                                                           | -9.7 | -8.2 |
| RUBi015        |  | PHE97,<br>VAL206,<br>PRO210                                                                                             | -9.1 | -7.9 |

|         |                                                                                    |                                                   |      |       |
|---------|------------------------------------------------------------------------------------|---------------------------------------------------|------|-------|
| RUBi016 | 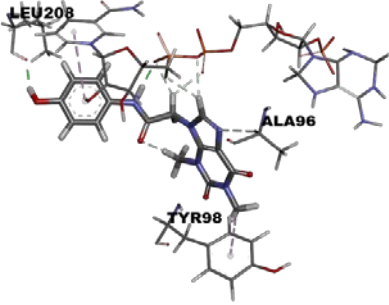  | ALA96,<br>TYR98,<br>LEU208                        | -8.9 | -7.53 |
| RUBi017 |   | PHE97,<br>MET163,<br>VAL164,<br>PHE171            | -8.8 | -8.7  |
| RUBi018 |  | PHE97,<br>MET163,<br>CYS168,<br>PHE171,<br>HIS267 | -8.4 | -8.8  |



**Table S2.** The IUPAC names of the top *TbPTR1* docking compounds

| Compound Information |                                                                                                           |                         |
|----------------------|-----------------------------------------------------------------------------------------------------------|-------------------------|
| Code Name            | IUPAC Name                                                                                                | Database ID             |
| RUBi001              | 2-(2,3-dihydroxyphenyl)-6-hydroxychromen-4-one                                                            | ZINC00057846            |
| RUBi002              | N-(2,6-dimethylphenyl)-2-(1-hydroxy-7-methoxy-9-oxo-xanthen-3-yl)oxyacetamide                             | ZINC08992677            |
| RUBi003              | 2-(4-Hydroxyphenyl)ethyl 4-hydroxy-3-methoxybenzoate                                                      | SANC00368               |
| RUBi004              | N'-{[1-(2,4-dimethylphenyl)-3-methyl-5-oxo-1,5-dihydro-4H-pyrazol-4-ylidene]methyl}-3-nitrobenzohydrazide | ZINC00809143            |
| RUBi005              | 2-nitro-N-({2-[(2-methylphenoxy)acetyl]hydrazino}carbothioyl)benzamide                                    | ZINC02690799            |
| RUBi006              | 1,4,6-Trihydroxy-3-methoxy-8-methyl-9H-xanthen-9-one                                                      | SANC00470               |
| RUBi007              | N-(4-methoxyphenyl)-2-[(4-oxo-5-phenyl-4,5-dihydro-1H-pyrazolo[3,4-d]pyrimidin-6-yl)sulfanyl]acetamide    | ZINC00630525            |
| RUBi008              | [3-Methoxy-4-(3-methyl-benzyloxy)-benzyl]-(1H-[1,2,4]triazol-3-yl)-amine                                  | ZINC06556964            |
| RUBi009              | N-{2-[(2-chlorobenzyl)oxy]ethyl}-2-(1,3-dimethyl-2,6-dioxo-1,2,3,6-tetrahydro-9H-purin-9-yl)acetamide     | ZINC02177983            |
| RUBi010              | 2-[[2-oxo-2-(1-pyrrolidinyl)ethyl]sulfanyl]-1,3-benzothiazol-6-ylamine                                    | ZINC00359797            |
| RUBi011              | 2-[2-(4-amino-1,2,5-oxadiazol-3-yl)-1H-benzimidazol-1-yl]-N-(3-fluoro-4-methylphenyl)acetamide            | ZINC00677623            |
| RUBi012              | 1-cyclohexyl-3-(4-sulfamoylphenyl)urea                                                                    | ZINC01003765            |
| RUBi013              | 3-[[5-methyl-3-isoxazolyl]amino]sulfonyl]-N-(1,3,4-thiadiazol-2-yl)benzamide                              | ZINC02184332            |
| RUBi014              | 2-(3,4-dihydroxyphenyl)-5,7-dihydroxy-3,4-dihydro-2H-1-benzopyran-4-one                                   | ZINC0058117 / SANC00320 |
| RUBi015              | N-(3-hydroxyphenyl)-2-(1-oxido-3-oxo-3,4-dihydro-2H-1,4-benzothiazin-2-yl)-2-oxoacetamide                 | ZINC04671320            |
| RUBi016              | 2-(1,3-dimethyl-2,6-dioxo-1,2,3,6-tetrahydro-9H-purin-9-yl)-N-(4-hydroxyphenyl)acetamide                  | ZINC00612219            |
| RUBi017              | 2-nitro-N-({2-[(2-nitrophenyl)formamido]propyl}benzamide                                                  | ZINC04523829            |
| RUBi018              | 2-[2-(cyclopentylidenehydrazono)-4-hydroxy-2,5-dihydro-1,3-thiazol-5-yl]-N-phenylacetamide                | ZINC04313814            |

**Table S3:** The Pearson correlation coefficients for RMSF vs Average L, Average BC vs 1/(Average L), and Average BC vs 1/(RMSF).

|               | <b>Pearson correlation coefficient</b> |                                  |                             |
|---------------|----------------------------------------|----------------------------------|-----------------------------|
| <b>System</b> | <b>RMSF vs Average L</b>               | <b>Average BC vs 1/Average L</b> | <b>Average BC vs 1/RMSF</b> |
| Apo protein   | 0.716                                  | 0.742                            | 0.434                       |
| RUBi004       | 0.743                                  | 0.664                            | 0.424                       |
| RUBi007       | 0.714                                  | 0.682                            | 0.505                       |
| RUBi014       | 0.714                                  | 0.632                            | 0.326                       |
| RUBi016       | 0.761                                  | 0.636                            | 0.383                       |
| RUBi018       | 0.808                                  | 0.646                            | 0.443                       |

**Table S4:** Protein structures used in molecular docking

| <b>Enzyme</b>                               | <b>ORGANISM</b>                  | <b>UNIPROT</b> | <b>PDB</b> | <b>Resolution (Angstroms)</b>      | <b>Chains</b> | <b>Residues</b> | <b>RMS<br/>(Protein vs 2X9N)</b> |
|---------------------------------------------|----------------------------------|----------------|------------|------------------------------------|---------------|-----------------|----------------------------------|
| Pteridine reductase 1                       | <i>Trypanosoma brucei brucei</i> | O76290         | 2X9N       | 1.15                               | A,B,C,D       | 288             | 0                                |
| Pteridine reductase 1                       | <i>Trypanosoma cruzi</i>         | O44029         | -          | Homology model based on 1MXH (2.2) | A,B,C,D       | 276             | 0.5                              |
| Pteridine reductase 1                       | <i>Leishmania major</i>          | Q01782         | 1E92       | 2.2                                | A,B,C,D       | 288             | 0.5                              |
| Dehydrogenase/reductase SDR family member 4 | <i>Homo sapiens</i>              | Q9BTZ2         | 3O4R       | 1.7                                | A,B,C,D       | 261             | 1.6                              |
| Dihydrofolate reductase                     | <i>Trypanosoma brucei brucei</i> | Q27783         | 3QFX       | 2.2                                | A, B          | 241             | 13.5                             |

**Table S5:** Molecular Docking Parameters for Autodock Vina

| <b>Parameter</b> | <b><i>T. brucei</i> PTR1<br/>(PDB: 2X9N)</b> | <b><i>T. cruzi</i> PTR1<br/>homology model</b> | <b><i>L. major</i> PTR1<br/>(PDB: 1E92)</b> | <b><i>H. Sapiens</i> DHRS4<br/>(PDB: 3O4R)</b> | <b><i>T. brucei</i><br/>(PDB: 3QFX)</b> |
|------------------|----------------------------------------------|------------------------------------------------|---------------------------------------------|------------------------------------------------|-----------------------------------------|
| Protein center X | 30.859                                       | 15.330                                         | 11.600                                      | 29.790                                         | -19.789                                 |
| Protein center Y | -0.064                                       | 32.050                                         | 45.880                                      | 2.200                                          | 23.569                                  |
| Protein center Z | 92.956                                       | -0.021                                         | 69.630                                      | 17.480                                         | 8.146                                   |
| Box size X       | 126                                          | 126                                            | 126                                         | 126                                            | 126                                     |
| Box size Y       | 126                                          | 126                                            | 126                                         | 126                                            | 126                                     |
| Box size Z       | 126                                          | 126                                            | 126                                         | 126                                            | 126                                     |
| Energy range     | 4                                            | 4                                              | 4                                           | 4                                              | 4                                       |
| Exhaustiveness   | 120                                          | 120                                            | 120                                         | 120                                            | 120                                     |
| CPU              | 24                                           | 24                                             | 24                                          | 24                                             | 24                                      |
